# Supplementary material for: In vitrostudy of polydopamine nanoparticles as protective antioxidant agents in fibroblasts derived from ARSACS patients
Source: Royal Society of Chemistry journal article supplement (doi:10.1039/d2bm00729k), 2022-01-01
Supplement: d2bm00729k1.pdf [file d2bm00729k1.pdf]

## SUPPORTING INFORMATION

### *In vitro* study of polydopamine nanoparticles as protective antioxidant agents in fibroblasts derived from ARSACS patients

*Matteo Battaglini*<sup>1\*</sup>, *Alessio Carmignani*<sup>1,2</sup>, *Chiara Martinelli*<sup>1</sup>, *Jamila Colica*<sup>1</sup>, *Attilio Marino*<sup>1</sup>,  
*Stefano Doccini*<sup>3</sup>, *Valentina Mollo*<sup>4</sup>, *Francesca Santoro*<sup>4</sup>, *Martina Bartolucci*<sup>5</sup>, *Andrea Petretto*<sup>5</sup>,  
*Filippo Maria Santorelli*<sup>3</sup>, *Gianni Ciofani*<sup>1\*</sup>

<sup>1</sup> Istituto Italiano di Tecnologia, Smart Bio-Interfaces, Viale Rinaldo Piaggio 34, 56025 Pontedera, Italy

<sup>2</sup> Sant'Anna School of Advanced Studies, The Biorobotics Institute, Viale Rinaldo Piaggio 34, 56025 Pontedera, Italy

<sup>3</sup> IRCCS Fondazione Stella Maris, Molecular Medicine for Neurodegenerative and Neuromuscular Diseases Unit, Via dei Giacinti 3, 56128 Pisa, Italy

<sup>4</sup> Istituto Italiano di Tecnologia, Center for Advanced Biomaterials for Health Care, Largo Barsanti e Matteucci 53, 80125 Napoli, Italy

<sup>5</sup> IRCCS Istituto Giannina Gaslini, Core Facilities-Clinical Proteomics and Metabolomics, Via Gerolamo Gaslini 5, 16147 Genova, Italy

\*Corresponding authors: [matteo.battaglini@iit.it](mailto:matteo.battaglini@iit.it); [gianni.ciofani@iit.it](mailto:gianni.ciofani@iit.it)

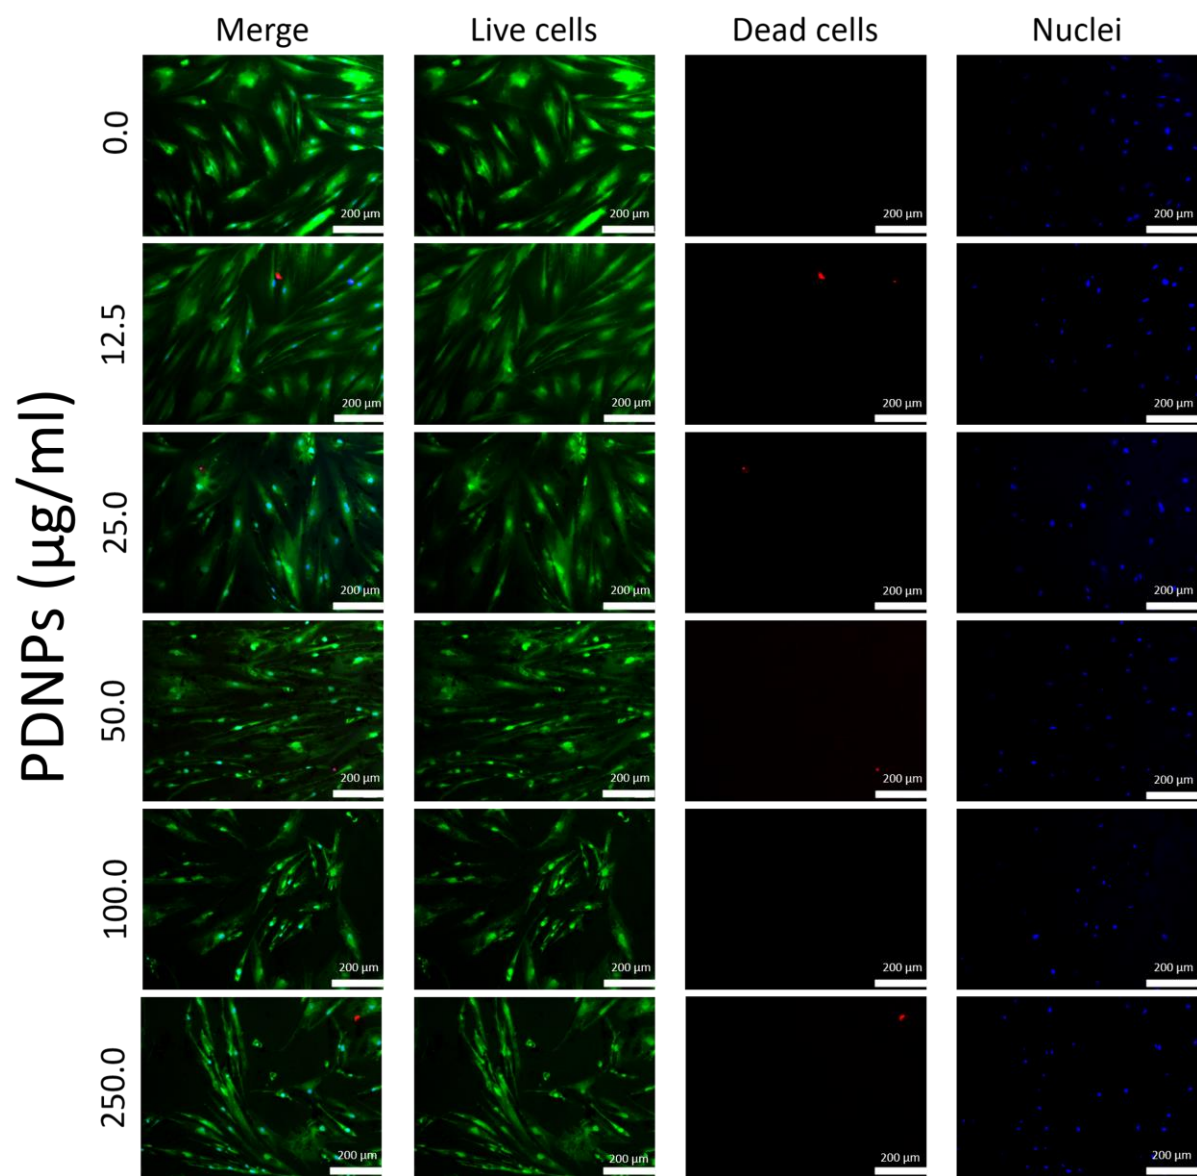

Figure S1. Representative epifluorescence images showing results of Live/Dead assay performed on healthy fibroblasts treated with increasing concentrations of PDNPs (in green live cells, in red dead cells, in blue nuclei).

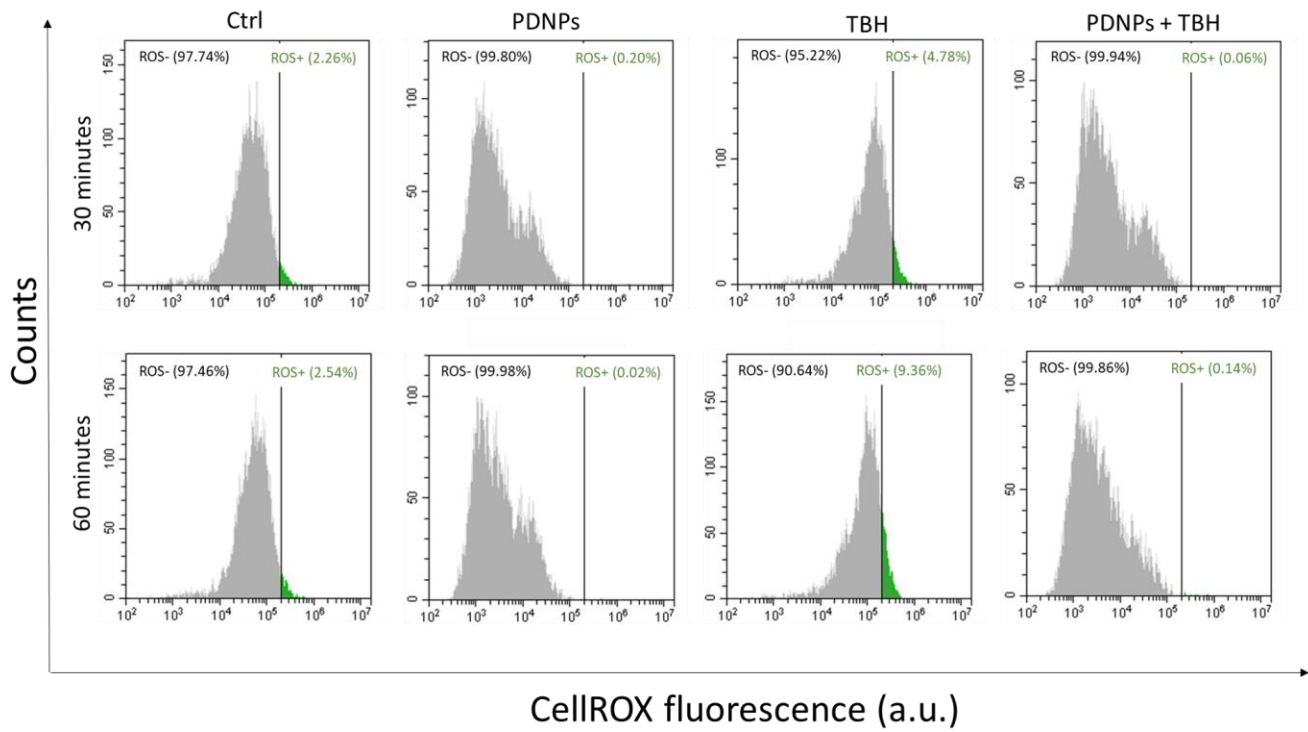

Figure S2. Representative histograms of flow cytometry analysis showing ROS levels in fibroblasts derived from healthy subjects (in grey ROS- cells, in green ROS+ cells) in the different experimental conditions.

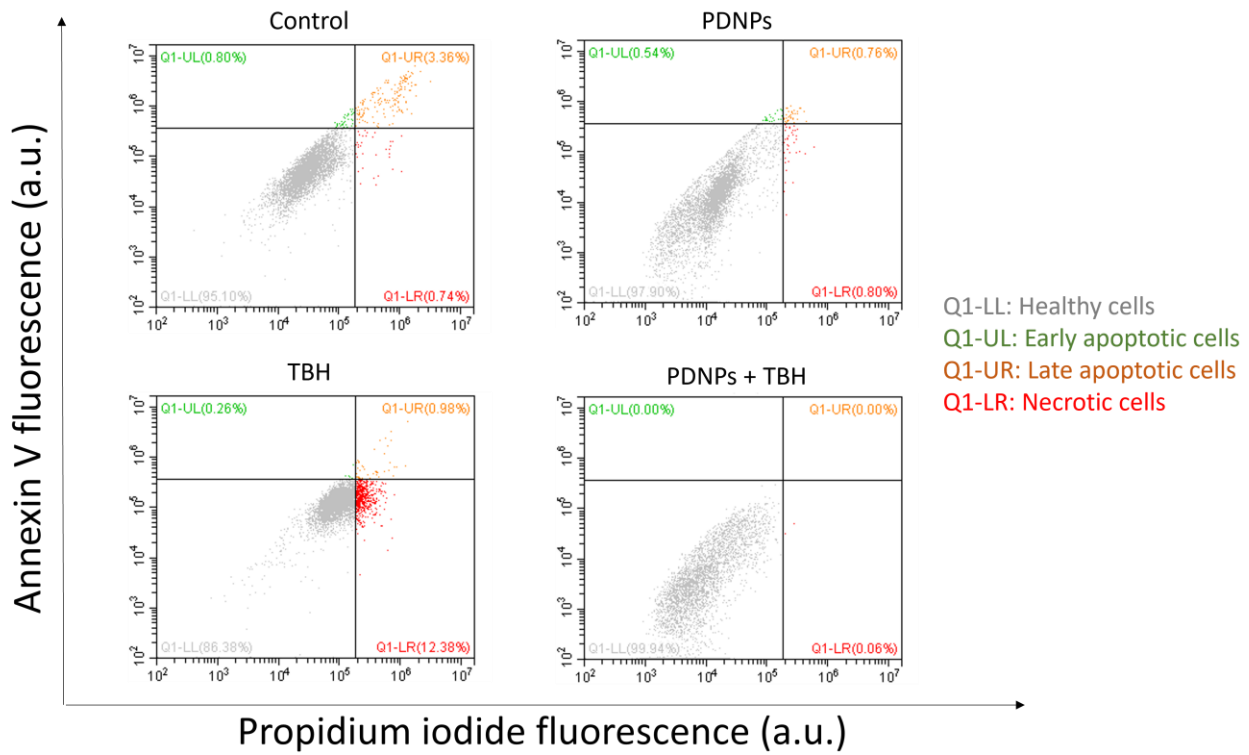

Figure S3. Representative dot plots of flow cytometry analysis showing the apoptosis/necrosis levels of fibroblasts derived from healthy subjects (in gray healthy cells, in green early apoptotic cells, in orange late apoptotic cells, in red necrotic cells) in the different experimental conditions.

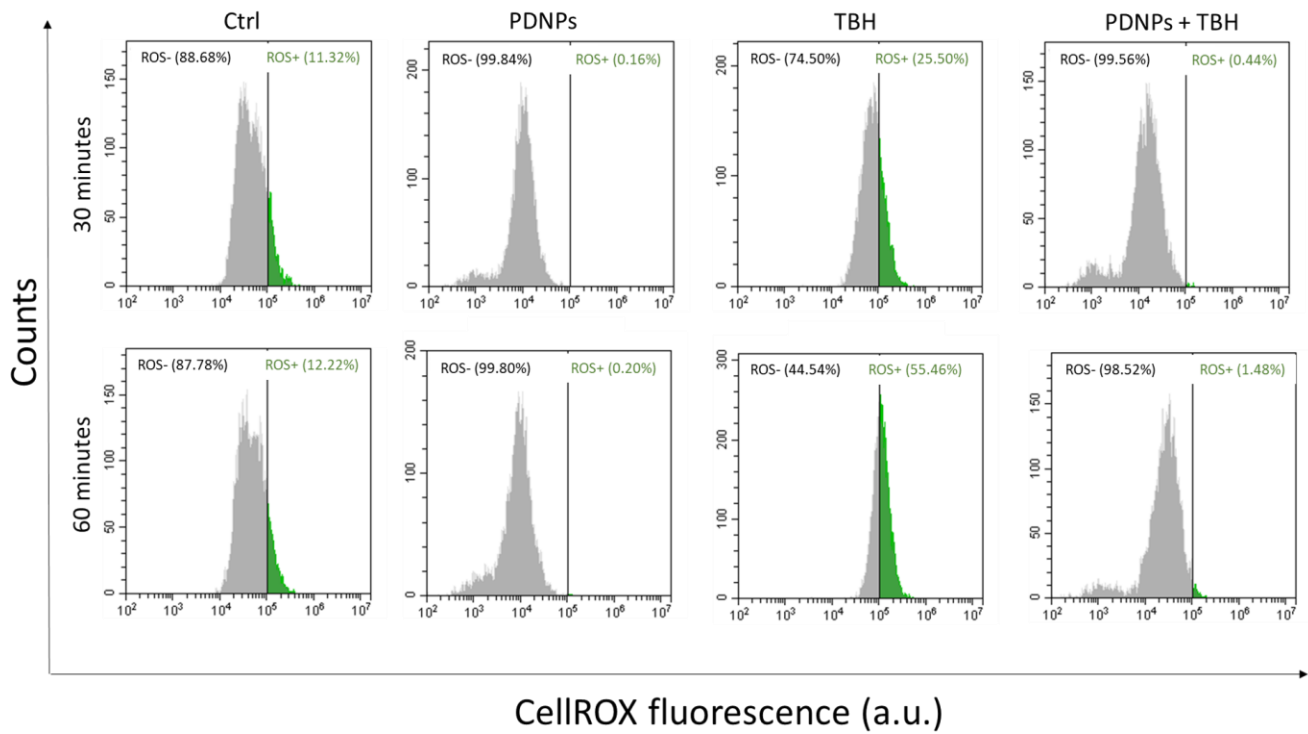

Figure S4. Representative histograms of flow cytometry analysis showing the ROS levels of fibroblasts derived from ARSACS patients (in grey ROS- cells, in green ROS+ cells) in the different experimental conditions.

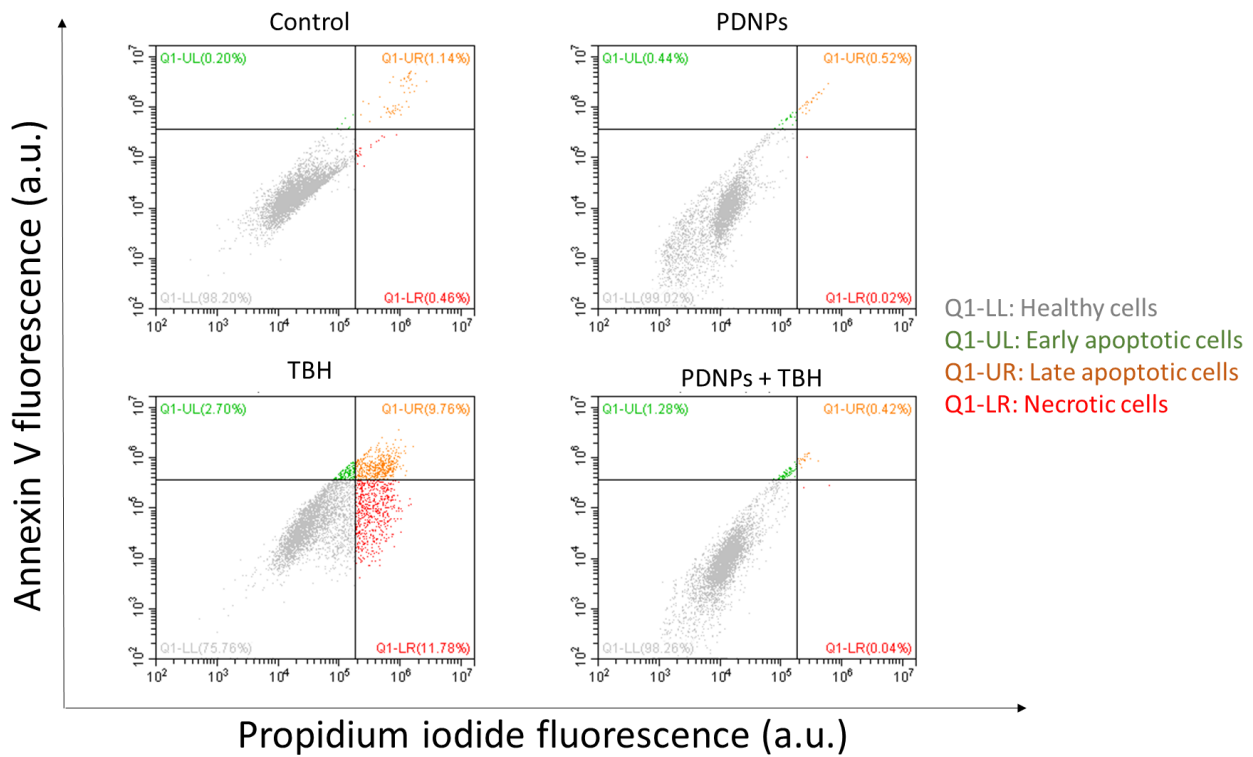

Figure S5. Representative dot plots of flow cytometry analysis showing the apoptosis/necrosis levels of fibroblasts derived from ARSACS patients (in grey healthy cells, in green early apoptotic cells, in orange late apoptotic cells, in red necrotic cells) in the different experimental conditions.

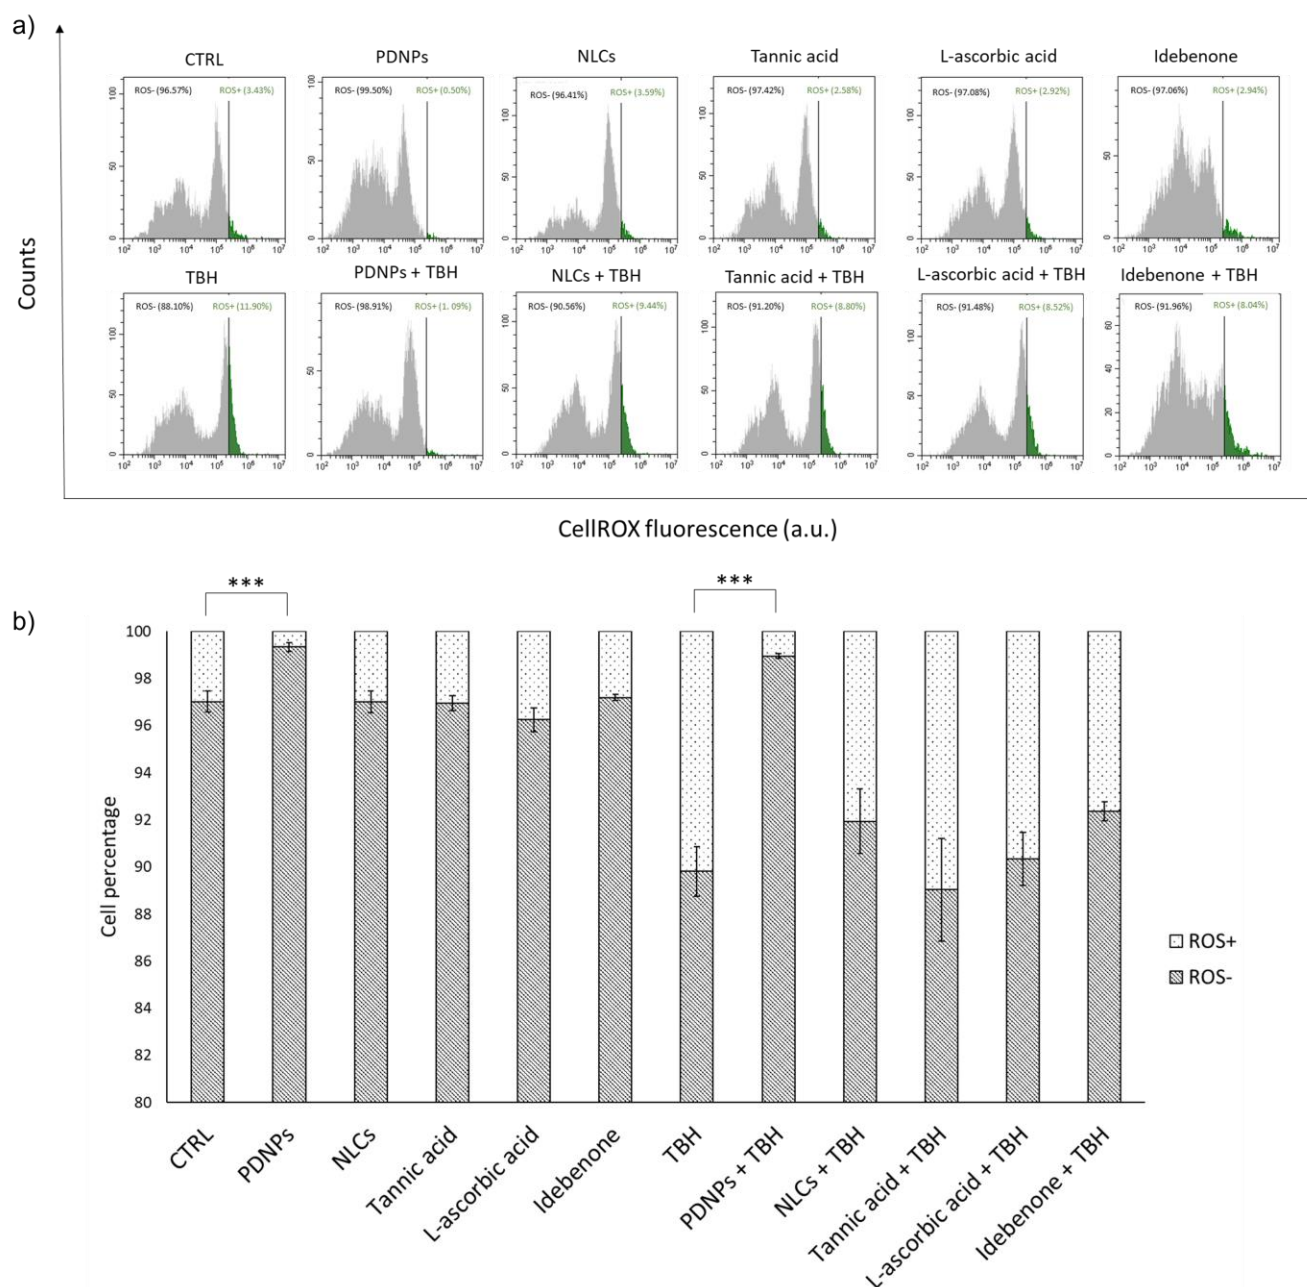

Figure S6. a) representative histograms of flow cytometry analysis showing ROS levels in fibroblasts derived from healthy subjects (in grey ROS- cells, in green ROS+ cells) in the different experimental conditions. b) Quantitative analysis of the antioxidant properties of PDNPs, NLCs, tannic acid, L-ascorbic acid, and idebenone on healthy fibroblasts. The plots show the % of ROS positive (ROS+) and ROS negative (ROS-) cells assessed by flow cytometry through CellRox<sup>TM</sup> staining (\*\*\*)  $p < 0.001$ ).



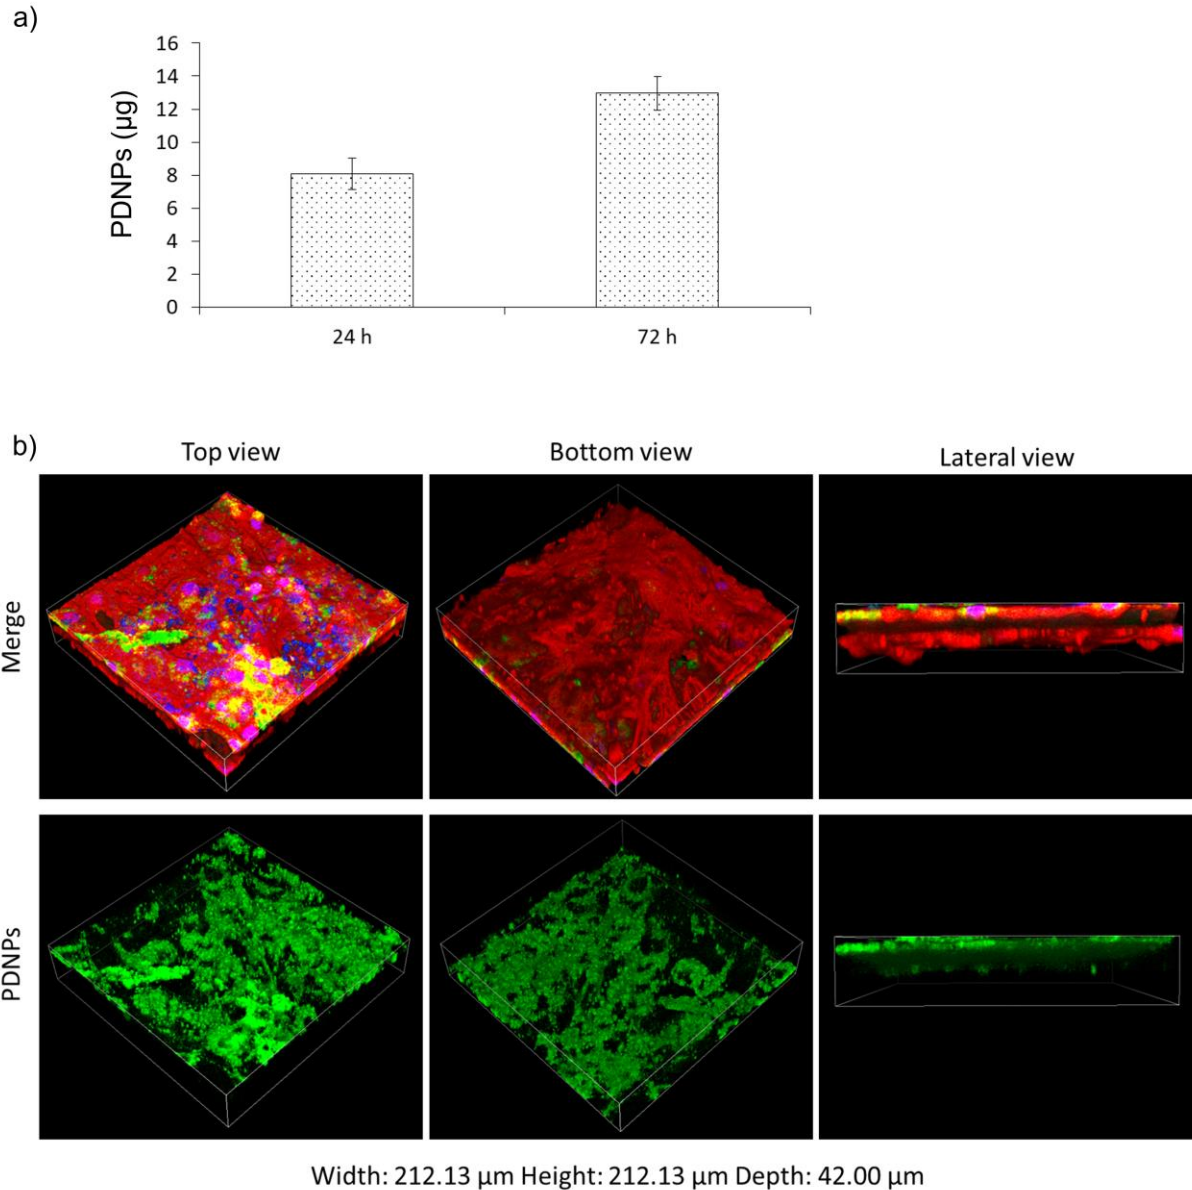

Figure S7. a) Amount of PDNPs able to cross the BBB *in vitro* model (PDNPs assessed in the basolateral side of the trans-well inserts after 24 and 72 h of incubation). b) 3D rendering obtained through confocal imaging of a representative trans-well insert seeded with bEnd.3 brain endothelial cells on the apical side (top view) and C8-D1A astrocytes on the basolateral side (bottom view) of the membrane. The co-cultures were treated with DiO stained PDNPs for 72 h in the apical compartment (f-actin in red, nuclei in blue, PDNPs in green).



Table S1. Clusters of differentially expressed proteins (healthy cells)

| Cluster       | Gene names | Protein names                                                                                                       |
|---------------|------------|---------------------------------------------------------------------------------------------------------------------|
| Cluster -1266 | FDPS       | Farnesyl pyrophosphate synthase                                                                                     |
| Cluster -1266 | AIMP1      | Aminoacyl tRNA synthase complex-interacting multifunctional protein 1;Endothelial monocyte-activating polypeptide 2 |
| Cluster -1266 | SPG20      | Spartin                                                                                                             |
| Cluster -1266 | SSR3       | Translocon-associated protein subunit gamma                                                                         |
| Cluster -1266 | WASF2      | Wiskott-Aldrich syndrome protein family member 2                                                                    |
| Cluster -1266 | RBM3       | RNA-binding protein 3                                                                                               |
| Cluster -1266 | PIN1       | Peptidyl-prolyl cis-trans isomerase NIMA-interacting 1                                                              |
| Cluster -1266 | SRM        | Spermidine synthase                                                                                                 |
| Cluster -1266 | TRIOBP     | TRIO and F-actin-binding protein                                                                                    |
| Cluster -1266 | HSPB6      | Heat shock protein beta-6                                                                                           |
| Cluster -1266 | PUF60      | Poly(U)-binding-splicing factor PUF60                                                                               |
| Cluster -1266 | UNC45A     | Protein unc-45 homolog A                                                                                            |
| Cluster -1266 | ANXA6      | Annexin                                                                                                             |
| Cluster -1266 | RING1;RNF2 | E3 ubiquitin-protein ligase RING1;E3 ubiquitin-protein ligase RING2                                                 |
| Cluster -1266 | SNRPE      | Small nuclear ribonucleoprotein E                                                                                   |
| Cluster -1266 | TXLNA      | Alpha-taxilin                                                                                                       |
| Cluster -1266 | SCOC       | Short coiled-coil protein                                                                                           |
| Cluster -1266 | API5       | Apoptosis inhibitor 5                                                                                               |
| Cluster -1266 | CLMP       | CXADR-like membrane protein                                                                                         |
| Cluster -1250 | ACTR10     | Actin-related protein 10                                                                                            |
| Cluster -1250 | MYCBP      | C-Myc-binding protein                                                                                               |
| Cluster -1250 | SAP18      | Histone deacetylase complex subunit SAP18                                                                           |
| Cluster -1250 | STK38      | Serine/threonine-protein kinase 38                                                                                  |
| Cluster -1250 | NHP2L1     | NHP2-like protein 1;NHP2-like protein 1, N-terminally processed                                                     |
| Cluster -1250 | GPS1       | COP9 signalosome complex subunit 1                                                                                  |
| Cluster -1250 | COPS5      | COP9 signalosome complex subunit 5                                                                                  |
| Cluster -1250 | CAB39      | Calcium-binding protein 39                                                                                          |
| Cluster -1250 | CAPG       | Macrophage-capping protein                                                                                          |
| Cluster -1250 | ACPI       | Low molecular weight phosphotyrosine protein phosphatase                                                            |
| Cluster -1250 | METAP2     | Methionine aminopeptidase 2                                                                                         |
| Cluster -1250 | ARPC1A     | Actin-related protein 2/3 complex subunit 1A                                                                        |
| Cluster -1250 | THOP1      | Thimet oligopeptidase                                                                                               |
| Cluster -1250 | HNRNPC     | Heterogeneous nuclear ribonucleoproteins C1/C2                                                                      |
| Cluster -1250 | UBXN1      | UBX domain-containing protein 1                                                                                     |

|               |                    |                                                                                                                       |
|---------------|--------------------|-----------------------------------------------------------------------------------------------------------------------|
| Cluster -1250 | CSRP2              | Cysteine and glycine-rich protein 2                                                                                   |
| Cluster -1250 | DCTN4              | Dynactin subunit 4                                                                                                    |
| Cluster -1250 | LACTB2             | Beta-lactamase-like protein 2                                                                                         |
| Cluster -1250 | CPPED1             | Serine/threonine-protein phosphatase CPPED1                                                                           |
| Cluster -1250 | YWHAH              | 14-3-3 protein eta                                                                                                    |
| Cluster -1250 | NT5C               | 5(3)-deoxyribonucleotidase, cytosolic type                                                                            |
| Cluster -1250 | CLTA               | Clathrin light chain A                                                                                                |
| Cluster -1250 | TCEB2              | Transcription elongation factor B polypeptide 2                                                                       |
| Cluster -1250 | SRP9;DKFZp564M2223 | Signal recognition particle 9 kDa protein                                                                             |
| Cluster -1250 | HDGFRP2            | Hepatoma-derived growth factor-related protein 2                                                                      |
| Cluster -1250 | CALU               | Calumenin                                                                                                             |
| Cluster -1250 | EIF1AX;EIF1AY      | Eukaryotic translation initiation factor 1A, X-chromosomal;Eukaryotic translation initiation factor 1A, Y-chromosomal |
| Cluster -1250 | PRRC2C             | Protein PRRC2C                                                                                                        |
| Cluster -1250 | CFL2               | Cofilin-2                                                                                                             |
| Cluster -1250 | C1orf123           | UPF0587 protein C1orf123                                                                                              |
| Cluster -1250 | DYNC2H1            | Cytoplasmic dynein 2 heavy chain 1                                                                                    |
| Cluster -1250 | ACTBL2             | Beta-actin-like protein 2                                                                                             |
| Cluster -1250 | FHL1               | Four and a half LIM domains protein 1                                                                                 |
| Cluster -1250 | IFI35              | Interferon-induced 35 kDa protein                                                                                     |
| Cluster -1250 | PPP1R18            | Phostensin                                                                                                            |
| Cluster -1250 | RPS19              | 40S ribosomal protein S19                                                                                             |
| Cluster -1250 | PCBP1              | Poly(rC)-binding protein 1                                                                                            |
| Cluster -1250 | ATP6V1G1           | V-type proton ATPase subunit G 1                                                                                      |
| Cluster -1250 | STX7               | Syntaxin-7                                                                                                            |
| Cluster -1250 | CDC37              | Hsp90 co-chaperone Cdc37;Hsp90 co-chaperone Cdc37, N-terminally processed                                             |
| Cluster -1250 | UBE2M              | NEDD8-conjugating enzyme Ubc12                                                                                        |
| Cluster -1250 | RPL8               | 60S ribosomal protein L8                                                                                              |
| Cluster -1250 | USP14              | Ubiquitin carboxyl-terminal hydrolase 14;Ubiquitin carboxyl-terminal hydrolase                                        |
| Cluster -1250 | IST1               | IST1 homolog                                                                                                          |
| Cluster -1250 | FAS                | Tumor necrosis factor receptor superfamily member 6                                                                   |
| Cluster -1250 | DAZAP1             | DAZ-associated protein 1                                                                                              |
| Cluster -1250 | PALM2;PALM2-AKAP2  | Paralemmin-2                                                                                                          |
| Cluster -1250 | C16orf62           | UPF0505 protein C16orf62                                                                                              |
| Cluster -1250 | MXRA7              | Matrix-remodeling-associated protein 7                                                                                |
| Cluster -1250 | RPS29              | 40S ribosomal protein S29                                                                                             |
| Cluster -1250 | RBMX;RBMXL1        | RNA-binding motif protein, X chromosome;RNA-binding motif protein, X chromosome, N-terminally processed;RNA           |

|               |                     |                                                                                     |
|---------------|---------------------|-------------------------------------------------------------------------------------|
|               |                     | binding motif protein, X-linked-like-1                                              |
| Cluster -1250 | ARPP19              | cAMP-regulated phosphoprotein 19                                                    |
| Cluster -1250 | SLC7A5;SLC7A7       | Large neutral amino acids transporter small subunit 1;Y+L amino acid transporter 1  |
| Cluster -1250 | RPLP2               | 60S acidic ribosomal protein P2                                                     |
| Cluster -1250 | RCC1                | Regulator of chromosome condensation                                                |
| Cluster -1250 | CRIP1               | Cysteine-rich protein 1                                                             |
| Cluster -1250 | C1orf198            | Uncharacterized protein C1orf198                                                    |
| Cluster -1250 | LARP1               | La-related protein 1                                                                |
| Cluster -1250 | NECAP2              | Adaptin ear-binding coat-associated protein 2                                       |
| Cluster -1250 | HGS                 | Hepatocyte growth factor-regulated tyrosine kinase substrate                        |
| Cluster -1250 | CRIP2               | Cysteine-rich protein 2                                                             |
| Cluster -1250 | GRB2                | Growth factor receptor-bound protein 2                                              |
| Cluster -1250 | PFDN2               | Prefoldin subunit 2                                                                 |
| Cluster -1250 | OVCA2               | Ovarian cancer-associated gene 2 protein                                            |
| Cluster -1250 | CAMK2B              | Calcium/calmodulin-dependent protein kinase type II subunit beta                    |
| Cluster -1250 | RPS28               | 40S ribosomal protein S28                                                           |
| Cluster -1250 | TPM1                | N/A                                                                                 |
| Cluster -1250 | H3F3A;H3F3B;HIST3H3 | Histone H3.3;Histone H3;Histone H3.1t                                               |
| Cluster -1250 | APEH                | Acylamino-acid-releasing enzyme                                                     |
| Cluster -1250 | CCDC74A;CCDC74B     | Coiled-coil domain-containing protein 74A;Coiled-coil domain-containing protein 74B |
| Cluster -1250 | PEF1                | Peflin                                                                              |
| Cluster -1250 | HNRNPAB             | Heterogeneous nuclear ribonucleoprotein A/B                                         |
| Cluster -1250 | PCNP                | PEST proteolytic signal-containing nuclear protein                                  |
| Cluster -1250 | NFASC               | Neurofascin                                                                         |
| Cluster -1250 | RPS5                | 40S ribosomal protein S5;40S ribosomal protein S5, N-terminally processed           |
| Cluster -1205 | NEDD8;NEDD8-MDP1    | NEDD8                                                                               |
| Cluster -1205 | EIF5                | Eukaryotic translation initiation factor 5                                          |
| Cluster -1205 | EIF3H               | Eukaryotic translation initiation factor 3 subunit H                                |
| Cluster -1205 | DPP3                | Dipeptidyl peptidase 3                                                              |
| Cluster -1205 | MCTS1               | Malignant T-cell-amplified sequence 1                                               |
| Cluster -1205 | CRKL                | Crk-like protein                                                                    |
| Cluster -1268 | AKR1C3              | Aldo-keto reductase family 1 member C3                                              |
| Cluster -1268 | BASP1               | Brain acid soluble protein 1                                                        |
| Cluster -1268 | ARPC1B              | Actin-related protein 2/3 complex subunit 1B                                        |
| Cluster -1268 | SUMO3               | Small ubiquitin-related modifier 3                                                  |
| Cluster -1268 | UBAP2L              | Ubiquitin-associated protein 2-like                                                 |
| Cluster -1268 | CHMP4B              | Charged multivesicular body protein 4b                                              |

|               |                |                                                                                                                                  |
|---------------|----------------|----------------------------------------------------------------------------------------------------------------------------------|
| Cluster -1268 | RPS6           | 40S ribosomal protein S6                                                                                                         |
| Cluster -1268 | GBP1           | Interferon-induced guanylate-binding protein 1                                                                                   |
| Cluster -1268 | PPP3R1         | Calcineurin subunit B type 1                                                                                                     |
| Cluster -1268 | GSTT1          | Glutathione S-transferase theta-1                                                                                                |
| Cluster -1268 | PFN2           | Profilin-2;Profilin                                                                                                              |
| Cluster -1268 | SCFD1          | Sec1 family domain-containing protein 1                                                                                          |
| Cluster -1268 | VBP1           | Prefoldin subunit 3                                                                                                              |
| Cluster -1268 | PNPO           | Pyridoxine-5-phosphate oxidase                                                                                                   |
| Cluster -1268 | PDXK           | Pyridoxal kinase                                                                                                                 |
| Cluster -1268 | SUGT1          | Suppressor of G2 allele of SKP1 homolog                                                                                          |
| Cluster -1268 | FSCN1          | Fascin                                                                                                                           |
| Cluster -1268 | 02-set         | Septin-2                                                                                                                         |
| Cluster -1268 | RAC1;RAC2;RAC3 | Ras-related C3 botulinum toxin substrate 1;Ras-related C3 botulinum toxin substrate 2;Ras-related C3 botulinum toxin substrate 3 |
| Cluster -1268 | ATIC           | Bifunctional purine biosynthesis protein PURH;Phosphoribosylaminoimidazolecarboxamide formyltransferase;IMP cyclohydrolase       |
| Cluster -1268 | RPL10A         | 60S ribosomal protein L10a                                                                                                       |
| Cluster -1268 | FHL2           | Four and a half LIM domains protein 2                                                                                            |
| Cluster -1268 | KPNA4          | Importin subunit alpha-3                                                                                                         |
| Cluster -1268 | RHOA           | Transforming protein RhoA                                                                                                        |
| Cluster -1268 | HMGB1;HMGB1 P1 | High mobility group protein B1;Putative high mobility group protein B1-like 1                                                    |
| Cluster -1268 | RPL23A         | 60S ribosomal protein L23a                                                                                                       |
| Cluster -1268 | SNRPD3         | Small nuclear ribonucleoprotein Sm D3                                                                                            |
| Cluster -1268 | RELA           | Transcription factor p65                                                                                                         |
| Cluster -1268 | G3BP2          | Ras GTPase-activating protein-binding protein 2                                                                                  |
| Cluster -1268 | CCT5           | T-complex protein 1 subunit epsilon                                                                                              |
| Cluster -1268 | EXOC7          | Exocyst complex component 7                                                                                                      |
| Cluster -1268 | SLC1A4         | Neutral amino acid transporter A                                                                                                 |
| Cluster -1268 | ARPC3          | Actin-related protein 2/3 complex subunit 3                                                                                      |
| Cluster -1268 | GUK1           | Guanylate kinase                                                                                                                 |
| Cluster -1268 | EIF2A          | Eukaryotic translation initiation factor 2A;Eukaryotic translation initiation factor 2A, N-terminally processed                  |
| Cluster -1268 | CORO1B         | Coronin-1B                                                                                                                       |
| Cluster -1268 | ENO2           | Gamma-enolase;Enolase                                                                                                            |
| Cluster -1268 | STIP1          | Stress-induced-phosphoprotein 1                                                                                                  |
| Cluster -1268 | EPN1           | Epsin-1                                                                                                                          |
| Cluster -1268 | UBE2L3         | Ubiquitin-conjugating enzyme E2 L3                                                                                               |
| Cluster -1268 | CASP3          | Caspase-3;Caspase-3 subunit p17;Caspase-3 subunit p12                                                                            |
| Cluster -1268 | AKR1A1         | Alcohol dehydrogenase [NADP(+)]                                                                                                  |

|               |                   |                                                                                                                                                                 |
|---------------|-------------------|-----------------------------------------------------------------------------------------------------------------------------------------------------------------|
| Cluster -1268 | PTGR1             | Prostaglandin reductase 1                                                                                                                                       |
| Cluster -1268 | ARPC5             | Actin-related protein 2/3 complex subunit 5                                                                                                                     |
| Cluster -1268 | LRRC47            | Leucine-rich repeat-containing protein 47                                                                                                                       |
| Cluster -1268 | UAP1              | UDP-N-acetylhexosamine pyrophosphorylase;UDP-N-acetylgalactosamine pyrophosphorylase;UDP-N-acetylglucosamine pyrophosphorylase                                  |
| Cluster -1268 | KARS              | Lysine--tRNA ligase                                                                                                                                             |
| Cluster -1268 | G3BP1             | Ras GTPase-activating protein-binding protein 1                                                                                                                 |
| Cluster -1268 | CAP1              | Adenylyl cyclase-associated protein 1                                                                                                                           |
| Cluster -1268 | PGD               | 6-phosphogluconate dehydrogenase, decarboxylating                                                                                                               |
| Cluster -1268 | CAPN1             | Calpain-1 catalytic subunit                                                                                                                                     |
| Cluster -1268 | TALDO1            | Transaldolase                                                                                                                                                   |
| Cluster -1268 | RRBP1             | Ribosome-binding protein 1                                                                                                                                      |
| Cluster -1268 | ILF3              | Interleukin enhancer-binding factor 3                                                                                                                           |
| Cluster -1268 | ABCE1             | ATP-binding cassette sub-family E member 1                                                                                                                      |
| Cluster -1268 | CNN1              | Calponin-1;Calponin                                                                                                                                             |
| Cluster -1268 | CCT3              | T-complex protein 1 subunit gamma                                                                                                                               |
| Cluster -1268 | USP5              | Ubiquitin carboxyl-terminal hydrolase 5                                                                                                                         |
| Cluster -1268 | PABPC1            | Polyadenylate-binding protein 1;Polyadenylate-binding protein                                                                                                   |
| Cluster -1268 | CMPK1             | UMP-CMP kinase                                                                                                                                                  |
| Cluster -1268 | PA2G4             | Proliferation-associated protein 2G4                                                                                                                            |
| Cluster -1268 | SERBP1            | Plasminogen activator inhibitor 1 RNA-binding protein                                                                                                           |
| Cluster -1268 | DYNCH2            | Cytoplasmic dynein 1 intermediate chain 2                                                                                                                       |
| Cluster -1268 | HNRNPA1;HNRNPA1L2 | Heterogeneous nuclear ribonucleoprotein A1;Heterogeneous nuclear ribonucleoprotein A1, N-terminally processed;Heterogeneous nuclear ribonucleoprotein A1-like 2 |
| Cluster -1268 | CTSL              | Cathepsin L1;Cathepsin L1 heavy chain;Cathepsin L1 light chain                                                                                                  |
| Cluster -1268 | UBA2              | SUMO-activating enzyme subunit 2                                                                                                                                |
| Cluster -1268 | DPYSL3            | Dihydropyrimidinase-related protein 3                                                                                                                           |
| Cluster -1268 | HNRNPA2B1         | Heterogeneous nuclear ribonucleoproteins A2/B1                                                                                                                  |
| Cluster -1268 | ASMTL             | N-acetylserotonin O-methyltransferase-like protein                                                                                                              |
| Cluster -1268 | SSB               | Lupus La protein                                                                                                                                                |
| Cluster -1268 | TPT1              | Translationally-controlled tumor protein                                                                                                                        |
| Cluster -1268 | AKR1C1            | Aldo-keto reductase family 1 member C1                                                                                                                          |
| Cluster -1268 | PPF1A1            | Liprin-alpha-1                                                                                                                                                  |
| Cluster -1268 | MARCKS            | Myristoylated alanine-rich C-kinase substrate                                                                                                                   |
| Cluster -1268 | PRPSAP2           | Phosphoribosyl pyrophosphate synthase-associated protein 2                                                                                                      |
| Cluster -1268 | HSPBP1            | Hsp70-binding protein 1                                                                                                                                         |
| Cluster -1268 | MAP1A             | Microtubule-associated protein 1A;MAP1A heavy chain;MAP1 light chain LC2                                                                                        |

|               |                               |                                                                                                                                             |
|---------------|-------------------------------|---------------------------------------------------------------------------------------------------------------------------------------------|
| Cluster -1268 | LPXN                          | Leupaxin                                                                                                                                    |
| Cluster -1268 | FERMT2                        | Fermitin family homolog 2                                                                                                                   |
| Cluster -1268 | SRSF4;SRSF6                   | Serine/arginine-rich splicing factor 4;Serine/arginine-rich splicing factor 6                                                               |
| Cluster -1268 | PPP1CB                        | Serine/threonine-protein phosphatase PP1-beta catalytic subunit;Serine/threonine-protein phosphatase                                        |
| Cluster -1268 | SEC31A                        | Protein transport protein Sec31A                                                                                                            |
| Cluster -1268 | RPS12                         | 40S ribosomal protein S12                                                                                                                   |
| Cluster -1268 | ANP32B                        | Acidic leucine-rich nuclear phosphoprotein 32 family member B                                                                               |
| Cluster -1268 | PURB                          | Transcriptional activator protein Pur-beta                                                                                                  |
| Cluster -1268 | FAM21A;FAM21 C                | WASH complex subunit FAM21A;WASH complex subunit FAM21C                                                                                     |
| Cluster -1268 | PAK2                          | Serine/threonine-protein kinase PAK 2;PAK-2p27;PAK-2p34                                                                                     |
| Cluster -1268 | TP53I3                        | Quinone oxidoreductase PIG3                                                                                                                 |
| Cluster -1268 | ENOPH1                        | Enolase-phosphatase E1                                                                                                                      |
| Cluster -1268 | ME1                           | NADP-dependent malic enzyme                                                                                                                 |
| Cluster -1268 | UBXN4                         | UBX domain-containing protein 4                                                                                                             |
| Cluster -1268 | ANP32A                        | Acidic leucine-rich nuclear phosphoprotein 32 family member A                                                                               |
| Cluster -1268 | PDCD5                         | Programmed cell death protein 5                                                                                                             |
| Cluster -1268 | UBE2D3;UBE2D 2;UBE2D4;UBE2 D1 | Ubiquitin-conjugating enzyme E2 D3;Ubiquitin-conjugating enzyme E2 D2;Ubiquitin-conjugating enzyme E2 D4;Ubiquitin-conjugating enzyme E2 D1 |
| Cluster -1268 | TMEM189-UBE2V1;UBE2V 1        | Ubiquitin-conjugating enzyme E2 variant 1                                                                                                   |
| Cluster -1268 | STRAP                         | Serine-threonine kinase receptor-associated protein                                                                                         |
| Cluster -1268 | UBQLN1                        | Ubiquilin-1                                                                                                                                 |
| Cluster -1268 | EHD4                          | EH domain-containing protein 4                                                                                                              |
| Cluster -1268 | YWHAQ                         | 14-3-3 protein theta                                                                                                                        |
| Cluster -1268 | CLIC1                         | Chloride intracellular channel protein 1                                                                                                    |
| Cluster -1268 | BIN1                          | Myc box-dependent-interacting protein 1                                                                                                     |
| Cluster -1268 | EHD1                          | EH domain-containing protein 1                                                                                                              |
| Cluster -1268 | COPZ2                         | Coatomer subunit zeta-2                                                                                                                     |
| Cluster -1268 | PSMD9                         | 26S proteasome non-ATPase regulatory subunit 9                                                                                              |
| Cluster -1268 | LTA4H                         | Leukotriene A-4 hydrolase                                                                                                                   |
| Cluster -1268 | NSFL1C                        | NSFL1 cofactor p47                                                                                                                          |
| Cluster -1268 | ASL                           | Argininosuccinate lyase                                                                                                                     |
| Cluster -1268 | CACYBP                        | Calcyclin-binding protein                                                                                                                   |
| Cluster -1268 | GSTM2                         | Glutathione S-transferase Mu 2                                                                                                              |
| Cluster -1268 | ASS1                          | Argininosuccinate synthase                                                                                                                  |
| Cluster -1268 | CDV3                          | Protein CDV3 homolog                                                                                                                        |

|               |          |                                                                                                                               |
|---------------|----------|-------------------------------------------------------------------------------------------------------------------------------|
| Cluster -1268 | CTTN     | Src substrate cortactin                                                                                                       |
| Cluster -1268 | DUSP3    | Dual specificity protein phosphatase 3                                                                                        |
| Cluster -1268 | GCLM     | Glutamate--cysteine ligase regulatory subunit                                                                                 |
| Cluster -1268 | TROVE2   | 60 kDa SS-A/Ro ribonucleoprotein                                                                                              |
| Cluster -1268 | CAPN2    | Calpain-2 catalytic subunit                                                                                                   |
| Cluster -1268 | ANXA1    | Annexin A1;Annexin                                                                                                            |
| Cluster -1268 | COTL1    | Coactosin-like protein                                                                                                        |
| Cluster -1268 | RNH1     | Ribonuclease inhibitor                                                                                                        |
| Cluster -1268 | TXNL1    | Thioredoxin-like protein 1                                                                                                    |
| Cluster -1268 | GPX1     | Glutathione peroxidase 1;Glutathione peroxidase                                                                               |
| Cluster -1268 | EIF3K    | Eukaryotic translation initiation factor 3 subunit K                                                                          |
| Cluster -1268 | MYL9     | Myosin regulatory light polypeptide 9                                                                                         |
| Cluster -1268 | CORO1C   | Coronin-1C;Coronin                                                                                                            |
| Cluster -1268 | TNKS1BP1 | 182 kDa tankyrase-1-binding protein                                                                                           |
| Cluster -1268 | PSMB5    | Proteasome subunit beta type-5                                                                                                |
| Cluster -1268 | CRK      | Adapter molecule crk                                                                                                          |
| Cluster -1268 | TPM4     | Tropomyosin alpha-4 chain                                                                                                     |
| Cluster -1268 | IQGAP1   | Ras GTPase-activating-like protein IQGAP1                                                                                     |
| Cluster -1268 | YWHAG    | 14-3-3 protein gamma;14-3-3 protein gamma, N-terminally processed                                                             |
| Cluster -1268 | MSRA     | Mitochondrial peptide methionine sulfoxide reductase                                                                          |
| Cluster -1268 | PPP1CA   | Serine/threonine-protein phosphatase PP1-alpha catalytic subunit;Serine/threonine-protein phosphatase                         |
| Cluster -1268 | DNPEP    | Aspartyl aminopeptidase                                                                                                       |
| Cluster -1268 | KATNAL2  | Katanin p60 ATPase-containing subunit A-like 2                                                                                |
| Cluster -1268 | EIF4H    | Eukaryotic translation initiation factor 4H                                                                                   |
| Cluster -1268 | RAD23B   | UV excision repair protein RAD23 homolog B                                                                                    |
| Cluster -1268 | 08-set   | Septin-8                                                                                                                      |
| Cluster -1268 | MAP1B    | Microtubule-associated protein 1B;MAP1B heavy chain;MAP1 light chain LC1                                                      |
| Cluster -1268 | CAPZA2   | F-actin-capping protein subunit alpha-2                                                                                       |
| Cluster -1268 | PEPD     | Xaa-Pro dipeptidase                                                                                                           |
| Cluster -1268 | DNPH1    | 2-deoxynucleoside 5-phosphate N-hydrolase 1                                                                                   |
| Cluster -1268 | HN1      | Hematological and neurological expressed 1 protein;Hematological and neurological expressed 1 protein, N-terminally processed |
| Cluster -1268 | PITPNA   | Phosphatidylinositol transfer protein alpha isoform                                                                           |
| Cluster -1268 | PSMB1    | Proteasome subunit beta type-1                                                                                                |
| Cluster -1268 | ACTR3    | Actin-related protein 3                                                                                                       |
| Cluster -1268 | WARS     | Tryptophan--tRNA ligase, cytoplasmic;T1-TrpRS;T2-TrpRS                                                                        |
| Cluster -1268 | PLS3     | Plastin-3                                                                                                                     |
| Cluster -1268 | ACTN1    | Alpha-actinin-1                                                                                                               |



|               |                     |                                                                                                                                 |
|---------------|---------------------|---------------------------------------------------------------------------------------------------------------------------------|
| Cluster -1268 | ACTN4               | Alpha-actinin-4                                                                                                                 |
| Cluster -1268 | UGP2                | UTP--glucose-1-phosphate uridylyltransferase                                                                                    |
| Cluster -1268 | ARPC2               | Actin-related protein 2/3 complex subunit 2                                                                                     |
| Cluster -1268 | PALLD               | Palladin                                                                                                                        |
| Cluster -1268 | CNN3                | Calponin-3                                                                                                                      |
| Cluster -1268 | DSTN                | Destrin                                                                                                                         |
| Cluster -1268 | ESD                 | S-formylglutathione hydrolase                                                                                                   |
| Cluster -1268 | MGLL                | Monoglyceride lipase                                                                                                            |
| Cluster -1268 | LMO7                | LIM domain only protein 7                                                                                                       |
| Cluster -1268 | PSAT1               | Phosphoserine aminotransferase                                                                                                  |
| Cluster -1268 | KTN1                | Kinectin                                                                                                                        |
| Cluster -1268 | UBE2H               | Ubiquitin-conjugating enzyme E2 H                                                                                               |
| Cluster -1268 | SNRPB2              | U2 small nuclear ribonucleoprotein B                                                                                            |
| Cluster -1268 | LMCD1               | LIM and cysteine-rich domains protein 1                                                                                         |
| Cluster -1268 | VAT1                | Synaptic vesicle membrane protein VAT-1 homolog                                                                                 |
| Cluster -1268 | LASP1               | LIM and SH3 domain protein 1                                                                                                    |
| Cluster -1268 | YBX1                | Nuclease-sensitive element-binding protein 1                                                                                    |
| Cluster -1268 | PSMA1               | Proteasome subunit alpha type-1;Proteasome subunit alpha type                                                                   |
| Cluster -1268 | NCL                 | Nucleolin                                                                                                                       |
| Cluster -1268 | ARCN1               | Coatomer subunit delta                                                                                                          |
| Cluster -1268 | PGAM1               | Phosphoglycerate mutase 1                                                                                                       |
| Cluster -1268 | HSPB7;DKFZp779D0968 | Heat shock protein beta-7                                                                                                       |
| Cluster -1268 | BTF3L4              | Transcription factor BTF3 homolog 4;Transcription factor BTF3                                                                   |
| Cluster -1268 | PGM2                | Phosphoglucomutase-2                                                                                                            |
| Cluster -1268 | PPA1                | Inorganic pyrophosphatase                                                                                                       |
| Cluster -1268 | ARHGAP1             | Rho GTPase-activating protein 1                                                                                                 |
| Cluster -1268 | TAGLN2              | Transgelin-2                                                                                                                    |
| Cluster -1268 | PSMA3               | Proteasome subunit alpha type-3                                                                                                 |
| Cluster -1268 | UCHL1               | Ubiquitin carboxyl-terminal hydrolase isozyme L1;Ubiquitin carboxyl-terminal hydrolase                                          |
| Cluster -1268 | YKT6                | Synaptobrevin homolog YKT6                                                                                                      |
| Cluster -1268 | PTGES3              | Prostaglandin E synthase 3                                                                                                      |
| Cluster -1268 | NACA                | Nascent polypeptide-associated complex subunit alpha, muscle-specific form;Nascent polypeptide-associated complex subunit alpha |
| Cluster -1268 | TAGLN               | Transgelin                                                                                                                      |
| Cluster -1268 | EEF1B2              | Elongation factor 1-beta                                                                                                        |
| Cluster -1268 | ST13;ST13P4;ST13P5  | Hsc70-interacting protein;Putative protein FAM10A4;Putative protein FAM10A5                                                     |
| Cluster -1268 | ABRACL              | Costars family protein ABRACL                                                                                                   |

|               |                  |                                                                                                                                         |
|---------------|------------------|-----------------------------------------------------------------------------------------------------------------------------------------|
| Cluster -1268 | MAPRE1           | Microtubule-associated protein RP/EB family member 1                                                                                    |
| Cluster -1268 | RPS21            | 40S ribosomal protein S21                                                                                                               |
| Cluster -1268 | PPIA             | Peptidyl-prolyl cis-trans isomerase A;Peptidyl-prolyl cis-trans isomerase A, N-terminally processed;Peptidyl-prolyl cis-trans isomerase |
| Cluster -1268 | YWHAE            | 14-3-3 protein epsilon                                                                                                                  |
| Cluster -1268 | TPI1             | Triosephosphate isomerase                                                                                                               |
| Cluster -1268 | PRDX2            | Peroxiredoxin-2                                                                                                                         |
| Cluster -1268 | YWHAB            | 14-3-3 protein beta/alpha;14-3-3 protein beta/alpha, N-terminally processed                                                             |
| Cluster -1268 | ALDOA            | Fructose-bisphosphate aldolase A;Fructose-bisphosphate aldolase                                                                         |
| Cluster -1268 | SEPT11;SEPT6     | Septin-11;Septin-6                                                                                                                      |
| Cluster -1268 | PGM1             | Phosphoglucomutase-1                                                                                                                    |
| Cluster -1268 | DBI              | Acyl-CoA-binding protein                                                                                                                |
| Cluster -1268 | RDX              | Radixin                                                                                                                                 |
| Cluster -1268 | VPS29            | Vacuolar protein sorting-associated protein 29                                                                                          |
| Cluster -1268 | PARVA            | Alpha-parvin                                                                                                                            |
| Cluster -1268 | UBE2N;UBE2NL     | Ubiquitin-conjugating enzyme E2 N;Putative ubiquitin-conjugating enzyme E2 N-like                                                       |
| Cluster -1268 | EIF2S3;EIF2S3L   | Eukaryotic translation initiation factor 2 subunit 3;Putative eukaryotic translation initiation factor 2 subunit 3-like protein         |
| Cluster -1268 | HSPA4            | Heat shock 70 kDa protein 4                                                                                                             |
| Cluster -1268 | TKT              | Transketolase                                                                                                                           |
| Cluster -1268 | PSMA7;PSMA8      | Proteasome subunit alpha type-7;Proteasome subunit alpha type-7-like                                                                    |
| Cluster -1268 | NPEPPS           | Puromycin-sensitive aminopeptidase                                                                                                      |
| Cluster -1268 | ARPC4;ARPC4-TLL3 | Actin-related protein 2/3 complex subunit 4                                                                                             |
| Cluster -1268 | NANS             | Sialic acid synthase                                                                                                                    |
| Cluster -1268 | STMN1            | Stathmin                                                                                                                                |
| Cluster -1268 | GYG1             | Glycogenin-1                                                                                                                            |
| Cluster -1268 | RBBP4            | Histone-binding protein RBBP4                                                                                                           |
| Cluster -1268 | GDI2             | Rab GDP dissociation inhibitor beta                                                                                                     |
| Cluster -1268 | TXNDC17          | Thioredoxin domain-containing protein 17                                                                                                |
| Cluster -1268 | NUTF2            | Nuclear transport factor 2                                                                                                              |
| Cluster -1268 | PITPNB           | Phosphatidylinositol transfer protein beta isoform                                                                                      |
| Cluster -1268 | UBE2I            | SUMO-conjugating enzyme UBC9                                                                                                            |
| Cluster -1268 | AHNAK2           | Protein AHNAK2                                                                                                                          |
| Cluster -1268 | PRDX6            | Peroxiredoxin-6                                                                                                                         |
| Cluster -1268 | LDHB             | L-lactate dehydrogenase B chain;L-lactate dehydrogenase                                                                                 |
| Cluster -1268 | TXN              | Thioredoxin                                                                                                                             |
| Cluster -1268 | PRDX1            | Peroxiredoxin-1                                                                                                                         |

|               |                       |                                                                                             |
|---------------|-----------------------|---------------------------------------------------------------------------------------------|
| Cluster -1268 | YWHAZ                 | 14-3-3 protein zeta/delta                                                                   |
| Cluster -1268 | HDGF                  | Hepatoma-derived growth factor                                                              |
| Cluster -1268 | VCL                   | Vinculin                                                                                    |
| Cluster -1268 | PYGB                  | Glycogen phosphorylase, brain form                                                          |
| Cluster -1268 | CALM2;CALM3;<br>CALM1 | N/A                                                                                         |
| Cluster -1268 | GSTP1                 | Glutathione S-transferase P                                                                 |
| Cluster -1268 | CFL1                  | Cofilin-1                                                                                   |
| Cluster -1268 | LDHA                  | L-lactate dehydrogenase A chain                                                             |
| Cluster -1268 | ABHD14B               | Alpha/beta hydrolase domain-containing protein 14B                                          |
| Cluster -1268 | GOT1                  | Aspartate aminotransferase, cytoplasmic                                                     |
| Cluster -1268 | RALA                  | Ras-related protein Ral-A                                                                   |
| Cluster -1268 | PFN1                  | Profilin-1                                                                                  |
| Cluster -1268 | CSTB                  | Cystatin-B                                                                                  |
| Cluster -1268 | EIF1;EIF1B            | Eukaryotic translation initiation factor 1;Eukaryotic translation initiation factor 1b      |
| Cluster -1268 | TCEB1                 | Transcription elongation factor B polypeptide 1                                             |
| Cluster -1268 | TBCA                  | Tubulin-specific chaperone A                                                                |
| Cluster -1268 | GDI1                  | Rab GDP dissociation inhibitor alpha                                                        |
| Cluster -1268 | PSMA6                 | Proteasome subunit alpha type-6;Proteasome subunit alpha type                               |
| Cluster -1268 | TARS                  | Threonine--tRNA ligase, cytoplasmic                                                         |
| Cluster -1268 | PHPT1                 | 14 kDa phosphohistidine phosphatase                                                         |
| Cluster -1268 | PURA                  | Transcriptional activator protein Pur-alpha                                                 |
| Cluster -1268 | PSMB3                 | Proteasome subunit beta type-3                                                              |
| Cluster -1268 | PEBP1                 | Phosphatidylethanolamine-binding protein 1;Hippocampal cholinergic neurostimulating peptide |
| Cluster -1268 | CAST                  | Calpastatin                                                                                 |
| Cluster -1268 | ADH5                  | Alcohol dehydrogenase class-3                                                               |
| Cluster -1268 | RNPEP                 | Aminopeptidase B                                                                            |
| Cluster -1268 | SGTA                  | Small glutamine-rich tetratricopeptide repeat-containing protein alpha                      |
| Cluster -1268 | SF1                   | Splicing factor 1                                                                           |
| Cluster -1268 | PSME1                 | Proteasome activator complex subunit 1                                                      |
| Cluster -1268 | LGALS3                | Galectin-3;Galectin                                                                         |
| Cluster -1268 | SH3BGRL               | SH3 domain-binding glutamic acid-rich-like protein                                          |
| Cluster -1268 | CLTB                  | Clathrin light chain B                                                                      |
| Cluster -1268 | HEBP1                 | Heme-binding protein 1                                                                      |
| Cluster -1268 | NQO1                  | NAD(P)H dehydrogenase [quinone] 1                                                           |
| Cluster -1268 | PDLIM1                | PDZ and LIM domain protein 1                                                                |
| Cluster -1268 | UBE2A                 | Ubiquitin-conjugating enzyme E2 A                                                           |
| Cluster -1268 | EZR                   | Ezrin                                                                                       |

|               |                     |                                                                                               |
|---------------|---------------------|-----------------------------------------------------------------------------------------------|
| Cluster -1268 | NUDC                | Nuclear migration protein nudC                                                                |
| Cluster -1268 | PARK7               | Protein deglycase DJ-1                                                                        |
| Cluster -1268 | ZC3H15              | Zinc finger CCCH domain-containing protein 15                                                 |
| Cluster -1268 | TWF1                | Twinfilin-1                                                                                   |
| Cluster -1268 | BTF3                | Transcription factor BTF3                                                                     |
| Cluster -1268 | AHSA1               | Activator of 90 kDa heat shock protein ATPase homolog 1                                       |
| Cluster -1268 | LSM1                | U6 snRNA-associated Sm-like protein LSM1                                                      |
| Cluster -1268 | PXN                 | Paxillin                                                                                      |
| Cluster -1268 | GPI                 | Glucose-6-phosphate isomerase                                                                 |
| Cluster -1268 | DBNL                | Drebrin-like protein                                                                          |
| Cluster -1268 | SH3BGRL3            | SH3 domain-binding glutamic acid-rich-like protein 3                                          |
| Cluster -1268 | TPM3                | N/A                                                                                           |
| Cluster -1268 | MTPN                | Myotrophin                                                                                    |
| Cluster -1268 | EEA1                | Early endosome antigen 1                                                                      |
| Cluster -1268 | OLA1                | Obg-like ATPase 1                                                                             |
| Cluster -1268 | SWAP70              | Switch-associated protein 70                                                                  |
| Cluster -1268 | PSMB8;PSM8          | Proteasome subunit beta type-8;Proteasome subunit beta type                                   |
| Cluster -1268 | EPS8                | Epidermal growth factor receptor kinase substrate 8                                           |
| Cluster -1268 | GSTM3               | Glutathione S-transferase Mu 3                                                                |
| Cluster -1268 | SYNC                | Syncoilin                                                                                     |
| Cluster -1268 | TMSB4X              | Thymosin beta-4;Hematopoietic system regulatory peptide                                       |
| Cluster -1268 | PSMA5               | Proteasome subunit alpha type-5                                                               |
| Cluster -1268 | UCHL3               | Ubiquitin carboxyl-terminal hydrolase isozyme L3;Ubiquitin carboxyl-terminal hydrolase        |
| Cluster -1268 | CBR1                | Carbonyl reductase [NADPH] 1                                                                  |
| Cluster -1268 | PTMS                | Parathymosin                                                                                  |
| Cluster -1268 | SNRPA               | U1 small nuclear ribonucleoprotein A                                                          |
| Cluster -1268 | GSS                 | Glutathione synthetase                                                                        |
| Cluster -1268 | TPD52L2             | Tumor protein D54                                                                             |
| Cluster -1268 | WDFY1               | WD repeat and FYVE domain-containing protein 1                                                |
| Cluster -1268 | RSU1                | Ras suppressor protein 1                                                                      |
| Cluster -1268 | PGLS                | 6-phosphogluconolactonase                                                                     |
| Cluster -1268 | ATOX1               | Copper transport protein ATOX1                                                                |
| Cluster -1268 | PPP1R7              | Protein phosphatase 1 regulatory subunit 7                                                    |
| Cluster -1268 | EIF4A2              | Eukaryotic initiation factor 4A-II;Eukaryotic initiation factor 4A-II, N-terminally processed |
| Cluster -1268 | GLO1                | Lactoylglutathione lyase                                                                      |
| Cluster -1268 | SET;SETSIP          | Protein SET;Protein SETSIP                                                                    |
| Cluster -1268 | NME2;NME1-NME2;NME1 | Nucleoside diphosphate kinase B;Nucleoside diphosphate kinase                                 |
| Cluster -1268 | AK1                 | Adenylate kinase isoenzyme 1                                                                  |
| Cluster -1268 | SOD1                | Superoxide dismutase [Cu-Zn]                                                                  |

|               |               |                                                                                                                                                |
|---------------|---------------|------------------------------------------------------------------------------------------------------------------------------------------------|
| Cluster -1268 | PNP           | Purine nucleoside phosphorylase                                                                                                                |
| Cluster -1268 | PAWR          | PRKC apoptosis WT1 regulator protein                                                                                                           |
| Cluster -1268 | RAP1GDS1      | Rap1 GTPase-GDP dissociation stimulator 1                                                                                                      |
| Cluster -1268 | SEC24D        | Protein transport protein Sec24D                                                                                                               |
| Cluster -1268 | PPP2R1A       | Serine/threonine-protein phosphatase 2A 65 kDa regulatory subunit A alpha isoform                                                              |
| Cluster -1268 | NAMPT         | Nicotinamide phosphoribosyltransferase                                                                                                         |
| Cluster -1268 | 09-set        | Septin-9                                                                                                                                       |
| Cluster -1268 | LPP           | Lipoma-preferred partner                                                                                                                       |
| Cluster -1268 | FKBP4         | Peptidyl-prolyl cis-trans isomerase FKBP4;Peptidyl-prolyl cis-trans isomerase FKBP4, N-terminally processed                                    |
| Cluster -1268 | LMNA          | Prelamin-A/C;Lamin-A/C                                                                                                                         |
| Cluster -1268 | HSP90AB1      | Heat shock protein HSP 90-beta                                                                                                                 |
| Cluster -1268 | FUBP1         | Far upstream element-binding protein 1                                                                                                         |
| Cluster -1268 | GNB2L1        | Guanine nucleotide-binding protein subunit beta-2-like 1;Guanine nucleotide-binding protein subunit beta-2-like 1, N-terminally processed      |
| Cluster -1268 | HNRNPDL       | Heterogeneous nuclear ribonucleoprotein D-like                                                                                                 |
| Cluster -1268 | DCTN3         | Dynactin subunit 3                                                                                                                             |
| Cluster -1268 | CAND1         | Cullin-associated NEDD8-dissociated protein 1                                                                                                  |
| Cluster -1268 | PAFAH1B2      | Platelet-activating factor acetylhydrolase IB subunit beta                                                                                     |
| Cluster -1268 | UROD          | Uroporphyrinogen decarboxylase                                                                                                                 |
| Cluster -1268 | BLVRA         | Biliverdin reductase A                                                                                                                         |
| Cluster -1268 | G6PD          | Glucose-6-phosphate 1-dehydrogenase                                                                                                            |
| Cluster -1268 | DDB1          | DNA damage-binding protein 1                                                                                                                   |
| Cluster -1268 | GBE1          | 1,4-alpha-glucan-branching enzyme                                                                                                              |
| Cluster -1268 | STAM2         | Signal transducing adapter molecule 2                                                                                                          |
| Cluster -1268 | PSMD10        | 26S proteasome non-ATPase regulatory subunit 10                                                                                                |
| Cluster -1268 | RAN           | GTP-binding nuclear protein Ran                                                                                                                |
| Cluster -1268 | PLEC          | Plectin                                                                                                                                        |
| Cluster -1268 | RPL12         | 60S ribosomal protein L12                                                                                                                      |
| Cluster -1268 | FLNC          | Filamin-C                                                                                                                                      |
| Cluster -1268 | EIF3B         | Eukaryotic translation initiation factor 3 subunit B                                                                                           |
| Cluster -1268 | UBA1          | Ubiquitin-like modifier-activating enzyme 1                                                                                                    |
| Cluster -1268 | RPSA          | 40S ribosomal protein SA                                                                                                                       |
| Cluster -1268 | SYNCRIP       | Heterogeneous nuclear ribonucleoprotein Q                                                                                                      |
| Cluster -1268 | NRBP1         | Nuclear receptor-binding protein                                                                                                               |
| Cluster -1268 | HSP90AB2P     | Putative heat shock protein HSP 90-beta 2                                                                                                      |
| Cluster -1268 | PPP2CA;PPP2CB | Serine/threonine-protein phosphatase 2A catalytic subunit alpha isoform;Serine/threonine-protein phosphatase 2A catalytic subunit beta isoform |
| Cluster -1268 | EIF4A1        | Eukaryotic initiation factor 4A-I                                                                                                              |

|               |             |                                                                                                                         |
|---------------|-------------|-------------------------------------------------------------------------------------------------------------------------|
| Cluster -1268 | LAMTOR5     | Ragulator complex protein LAMTOR5                                                                                       |
| Cluster -1268 | FUS         | RNA-binding protein FUS                                                                                                 |
| Cluster -1268 | EIF3I       | Eukaryotic translation initiation factor 3 subunit I                                                                    |
| Cluster -1268 | PLAA        | Phospholipase A-2-activating protein                                                                                    |
| Cluster -1268 | PLBD2       | Putative phospholipase B-like 2;Putative phospholipase B-like 2 32 kDa form;Putative phospholipase B-like 2 45 kDa form |
| Cluster -1268 | RANBP1      | Ran-specific GTPase-activating protein                                                                                  |
| Cluster -1268 | DDX39B      | Spliceosome RNA helicase DDX39B                                                                                         |
| Cluster -1268 | CNN2        | Calponin-2;Calponin                                                                                                     |
| Cluster -1268 | DAB2        | Disabled homolog 2                                                                                                      |
| Cluster -1268 | HINT1       | Histidine triad nucleotide-binding protein 1                                                                            |
| Cluster -1268 | PKM         | Pyruvate kinase PKM;Pyruvate kinase                                                                                     |
| Cluster -1268 | ARL3        | ADP-ribosylation factor-like protein 3                                                                                  |
| Cluster -1268 | MOB1B;MOB1A | MOB kinase activator 1B;MOB kinase activator 1A                                                                         |
| Cluster -1268 | SGCB        | Beta-sarcoglycan                                                                                                        |
| Cluster -1268 | BAX         | Apoptosis regulator BAX                                                                                                 |
| Cluster -1268 | ARF1        | ADP-ribosylation factor 1                                                                                               |
| Cluster -1268 | SRSF7       | Serine/arginine-rich splicing factor 7                                                                                  |
| Cluster -1268 | ASNA1       | ATPase ASNA1                                                                                                            |
| Cluster -1268 | NNMT        | Nicotinamide N-methyltransferase                                                                                        |
| Cluster -1268 | AP1G1       | AP-1 complex subunit gamma-1                                                                                            |
| Cluster -1268 | NARS        | Asparagine--tRNA ligase, cytoplasmic                                                                                    |
| Cluster -1268 | DCTN2       | Dynactin subunit 2                                                                                                      |
| Cluster -1268 | AP1B1       | AP-1 complex subunit beta-1                                                                                             |
| Cluster -1268 | EEF2        | Elongation factor 2                                                                                                     |
| Cluster -1268 | PSPH        | Phosphoserine phosphatase                                                                                               |
| Cluster -1268 | WDR1        | WD repeat-containing protein 1                                                                                          |
| Cluster -1268 | TPM4        | Tropomyosin alpha-4 chain                                                                                               |
| Cluster -1268 | DNM1L       | Dynamin-1-like protein                                                                                                  |
| Cluster -1268 | FLNA        | Filamin-A                                                                                                               |
| Cluster -1268 | TLN1        | Talin-1                                                                                                                 |
| Cluster -1268 | AKAP2       | A-kinase anchor protein 2                                                                                               |
| Cluster -1268 | HNRNPD      | Heterogeneous nuclear ribonucleoprotein D0                                                                              |
| Cluster -1268 | AHNAK       | Neuroblast differentiation-associated protein AHNAK                                                                     |
| Cluster -1268 | CALD1       | Caldesmon                                                                                                               |
| Cluster -1268 | EEF1D       | Elongation factor 1-delta                                                                                               |
| Cluster -1268 | ZYX         | Zyxin                                                                                                                   |
| Cluster -1268 | CSRP1       | Cysteine and glycine-rich protein 1                                                                                     |
| Cluster -1268 | CLIC4       | Chloride intracellular channel protein 4                                                                                |
| Cluster -1268 | S100A11     | Protein S100-A11;Protein S100-A11, N-terminally processed                                                               |

|               |           |                                                                                                                                                                 |
|---------------|-----------|-----------------------------------------------------------------------------------------------------------------------------------------------------------------|
| Cluster -1268 | MAP4      | Microtubule-associated protein 4;Microtubule-associated protein                                                                                                 |
| Cluster -1268 | RAB11FIP5 | Rab11 family-interacting protein 5                                                                                                                              |
| Cluster -1268 | MSN       | Moesin                                                                                                                                                          |
| Cluster -1268 | LIMA1     | LIM domain and actin-binding protein 1                                                                                                                          |
| Cluster -1268 | FAM129B   | Niban-like protein 1                                                                                                                                            |
| Cluster -1268 | UBLCP1    | Ubiquitin-like domain-containing CTD phosphatase 1                                                                                                              |
| Cluster -1268 | FAM114A1  | Protein NOXP20                                                                                                                                                  |
| Cluster -1268 | AKAP12    | A-kinase anchor protein 12                                                                                                                                      |
| Cluster -1268 | FKBP3     | Peptidyl-prolyl cis-trans isomerase FKBP3                                                                                                                       |
| Cluster -1268 | FKBP1A    | Peptidyl-prolyl cis-trans isomerase FKBP1A;Peptidyl-prolyl cis-trans isomerase                                                                                  |
| Cluster -1268 | BID       | BH3-interacting domain death agonist;BH3-interacting domain death agonist p15;BH3-interacting domain death agonist p13;BH3-interacting domain death agonist p11 |
| Cluster -1268 | VCP       | Transitional endoplasmic reticulum ATPase                                                                                                                       |
| Cluster -1268 | PSMB2     | Proteasome subunit beta type-2                                                                                                                                  |
| Cluster -1268 | CAPZB     | F-actin-capping protein subunit beta                                                                                                                            |
| Cluster -1268 | AKR1B1    | Aldose reductase                                                                                                                                                |
| Cluster -1268 | PKM       | Pyruvate kinase PKM;Pyruvate kinase                                                                                                                             |
| Cluster -1268 | HMOX1     | Heme oxygenase 1                                                                                                                                                |
| Cluster -1268 | LGALS1    | Galectin-1                                                                                                                                                      |
| Cluster -1268 | DDAH2     | N(G),N(G)-dimethylarginine dimethylaminohydrolase 2                                                                                                             |
| Cluster -1268 | PLIN3     | Perilipin-3                                                                                                                                                     |
| Cluster -1268 | CARS      | Cysteine--tRNA ligase, cytoplasmic                                                                                                                              |
| Cluster -1268 | HARS      | Histidine--tRNA ligase, cytoplasmic                                                                                                                             |
| Cluster -1268 | DDT;DDTL  | D-dopachrome decarboxylase;D-dopachrome decarboxylase-like protein                                                                                              |
| Cluster -1268 | TXNRD1    | Thioredoxin reductase 1, cytoplasmic                                                                                                                            |
| Cluster -1268 | MDH1      | Malate dehydrogenase, cytoplasmic;Malate dehydrogenase                                                                                                          |
| Cluster -1268 | ARHGDI1   | Rho GDP-dissociation inhibitor 1                                                                                                                                |
| Cluster -1268 | MIF       | Macrophage migration inhibitory factor                                                                                                                          |
| Cluster -1268 | IPO5      | Importin-5                                                                                                                                                      |
| Cluster -1268 | VPS25     | Vacuolar protein-sorting-associated protein 25                                                                                                                  |
| Cluster -1268 | EIF4E     | Eukaryotic translation initiation factor 4E                                                                                                                     |
| Cluster -1268 | ENSA      | Alpha-endosulfine                                                                                                                                               |
| Cluster -1268 | PSMA2     | Proteasome subunit alpha type-2;Proteasome subunit alpha type                                                                                                   |
| Cluster -1268 | PTBP1     | Polypyrimidine tract-binding protein 1                                                                                                                          |
| Cluster -1268 | SPTAN1    | Spectrin alpha chain, non-erythrocytic 1                                                                                                                        |
| Cluster -1268 | SPTBN1    | Spectrin beta chain, non-erythrocytic 1                                                                                                                         |
| Cluster -1268 | CAPZA1    | F-actin-capping protein subunit alpha-1                                                                                                                         |
| Cluster -1268 | ENO1      | Alpha-enolase;Enolase                                                                                                                                           |



|               |                       |                                                                                                                                                                                            |
|---------------|-----------------------|--------------------------------------------------------------------------------------------------------------------------------------------------------------------------------------------|
| Cluster -1268 | PGK1                  | Phosphoglycerate kinase 1                                                                                                                                                                  |
| Cluster -1268 | DPYSL2                | Dihydropyrimidinase-related protein 2                                                                                                                                                      |
| Cluster -1268 | PCMT1                 | Protein-L-isoaspartate(D-aspartate) O-methyltransferase;Protein-L-isoaspartate O-methyltransferase                                                                                         |
| Cluster -1268 | CAPNS1                | Calpain small subunit 1                                                                                                                                                                    |
| Cluster -1268 | PDCD6IP               | Programmed cell death 6-interacting protein                                                                                                                                                |
| Cluster -1268 | HSPA8                 | Heat shock cognate 71 kDa protein                                                                                                                                                          |
| Cluster -1268 | VIM                   | Vimentin                                                                                                                                                                                   |
| Cluster -1268 | HSP90AA1              | Heat shock protein HSP 90-alpha                                                                                                                                                            |
| Cluster -1268 | EIF5B                 | Eukaryotic translation initiation factor 5B                                                                                                                                                |
| Cluster -1268 | EIF5A;EIF5AL1; EIF5A2 | Eukaryotic translation initiation factor 5A-1;Eukaryotic translation initiation factor 5A;Eukaryotic translation initiation factor 5A-1-like;Eukaryotic translation initiation factor 5A-2 |
| Cluster -1268 | TWF2                  | Twinfilin-2                                                                                                                                                                                |
| Cluster -1268 | MAPK1                 | Mitogen-activated protein kinase 1                                                                                                                                                         |
| Cluster -1268 | EIF2S1                | Eukaryotic translation initiation factor 2 subunit 1                                                                                                                                       |
| Cluster -1268 | FARSA                 | Phenylalanine--tRNA ligase alpha subunit                                                                                                                                                   |
| Cluster -1268 | HSPA1A;HSPA1 B        | Heat shock 70 kDa protein 1A;Heat shock 70 kDa protein 1B                                                                                                                                  |
| Cluster -1268 | 07-set                | Septin-7                                                                                                                                                                                   |
| Cluster -1268 | ERH                   | Enhancer of rudimentary homolog                                                                                                                                                            |
| Cluster -1268 | RPL7A                 | 60S ribosomal protein L7a                                                                                                                                                                  |
| Cluster -1268 | TCP11L1               | T-complex protein 11-like protein 1                                                                                                                                                        |
| Cluster -1268 | S100A6                | Protein S100-A6;Protein S100                                                                                                                                                               |
| Cluster -1268 | GIPC1                 | PDZ domain-containing protein GIPC1                                                                                                                                                        |
| Cluster -1268 | GNPDA1                | Glucosamine-6-phosphate isomerase 1;Glucosamine-6-phosphate isomerase                                                                                                                      |
| Cluster -1268 | ACOT7                 | Cytosolic acyl coenzyme A thioester hydrolase                                                                                                                                              |
| Cluster -1268 | TPMT                  | Thiopurine S-methyltransferase                                                                                                                                                             |
| Cluster -1268 | CLIP1                 | CAP-Gly domain-containing linker protein 1                                                                                                                                                 |
| Cluster -1268 | DDX42                 | ATP-dependent RNA helicase DDX42                                                                                                                                                           |
| Cluster -1268 | BLVRB                 | Flavin reductase (NADPH)                                                                                                                                                                   |
| Cluster -1268 | HIST2H3PS2            | Histone H3                                                                                                                                                                                 |
| Cluster -1268 | CDC42                 | Cell division control protein 42 homolog                                                                                                                                                   |
| Cluster -1268 | TSN                   | Translin                                                                                                                                                                                   |
| Cluster -1268 | LSM8                  | U6 snRNA-associated Sm-like protein LSm8                                                                                                                                                   |
| Cluster -1268 | PRKACB                | cAMP-dependent protein kinase catalytic subunit beta                                                                                                                                       |
| Cluster -1268 | ETF1                  | Eukaryotic peptide chain release factor subunit 1                                                                                                                                          |
| Cluster -1268 | SRSF1                 | Serine/arginine-rich splicing factor 1                                                                                                                                                     |
| Cluster -1268 | SYNPO2                | Synaptopodin-2                                                                                                                                                                             |
| Cluster -1268 | HSPH1                 | Heat shock protein 105 kDa                                                                                                                                                                 |

|               |               |                                                                                    |
|---------------|---------------|------------------------------------------------------------------------------------|
| Cluster -1268 | MAT2A         | S-adenosylmethionine synthase isoform type-2                                       |
| Cluster -1268 | STX4          | Syntaxin-4                                                                         |
| Cluster -1268 | HPRT1         | Hypoxanthine-guanine phosphoribosyltransferase                                     |
| Cluster -1274 | TBCB          | Tubulin-folding cofactor B                                                         |
| Cluster -1274 | CTNNA2        | Catenin alpha-2                                                                    |
| Cluster -1274 | SRRT          | Serrate RNA effector molecule homolog                                              |
| Cluster -1274 | CLPTM1        | Cleft lip and palate transmembrane protein 1                                       |
| Cluster -1274 | TRAM2         | Translocating chain-associated membrane protein 2                                  |
| Cluster -1274 | ALYREF        | THO complex subunit 4                                                              |
| Cluster -1274 | SNRPD2        | Small nuclear ribonucleoprotein Sm D2                                              |
| Cluster -1274 | CIRBP         | Cold-inducible RNA-binding protein                                                 |
| Cluster -1274 | RPS10;RPS10P5 | 40S ribosomal protein S10;Putative 40S ribosomal protein S10-like                  |
| Cluster -1274 | STX12         | Syntaxin-12                                                                        |
| Cluster -1274 | SNAPIN        | SNARE-associated protein Snapin                                                    |
| Cluster -1274 | STIM1         | Stromal interaction molecule 1                                                     |
| Cluster -1274 | CTNNA1        | Catenin alpha-1                                                                    |
| Cluster -1274 | CTBP1         | C-terminal-binding protein 1                                                       |
| Cluster -1274 | AKAP9         | A-kinase anchor protein 9                                                          |
| Cluster -1274 | CBFB          | Core-binding factor subunit beta                                                   |
| Cluster -1274 | GLTP          | Glycolipid transfer protein                                                        |
| Cluster -1274 | DNAJA2        | DnaJ homolog subfamily A member 2                                                  |
| Cluster -1274 | RAB35         | Ras-related protein Rab-35                                                         |
| Cluster -1274 | ABR;BCR       | Active breakpoint cluster region-related protein;Breakpoint cluster region protein |
| Cluster -1274 | ATP6V1F       | V-type proton ATPase subunit F                                                     |
| Cluster -1274 | GSTO1         | Glutathione S-transferase omega-1                                                  |
| Cluster -1274 | MAP2K2        | Dual specificity mitogen-activated protein kinase kinase 2                         |
| Cluster -1274 | GSR           | Glutathione reductase, mitochondrial                                               |
| Cluster -1274 | EPB41L2       | Band 4.1-like protein 2                                                            |
| Cluster -1274 | BAG3          | BAG family molecular chaperone regulator 3                                         |
| Cluster -1274 | EIF4B         | Eukaryotic translation initiation factor 4B                                        |
| Cluster -1274 | MAT2B         | Methionine adenosyltransferase 2 subunit beta                                      |
| Cluster -1274 | KHDRBS1       | KH domain-containing, RNA-binding, signal transduction-associated protein 1        |
| Cluster -1274 | PRPSAP1       | Phosphoribosyl pyrophosphate synthase-associated protein 1                         |
| Cluster -1274 | TFG           | Protein TFG                                                                        |
| Cluster -1274 | SGSH          | N-sulphoglucosamine sulphohydrolase                                                |
| Cluster -1274 | AGL           | Glycogen debranching enzyme;4-alpha-glucanotransferase;Amylo-alpha-1,6-glucosidase |
| Cluster -1274 | AHCY          | Adenosylhomocysteinase                                                             |
| Cluster -1274 | BOLA2         | BolA-like protein 2                                                                |

|               |                     |                                                                                            |
|---------------|---------------------|--------------------------------------------------------------------------------------------|
| Cluster -1274 | ILF2                | Interleukin enhancer-binding factor 2                                                      |
| Cluster -1274 | IDH1                | Isocitrate dehydrogenase [NADP] cytoplasmic                                                |
| Cluster -1274 | ARPC5L              | Actin-related protein 2/3 complex subunit 5-like protein                                   |
| Cluster -1274 | LUC7L2              | Putative RNA-binding protein Luc7-like 2                                                   |
| Cluster -1274 | FN3KRP              | Ketosamine-3-kinase                                                                        |
| Cluster -1274 | PSMD4               | 26S proteasome non-ATPase regulatory subunit 4                                             |
| Cluster -1274 | PSMB7               | Proteasome subunit beta type-7                                                             |
| Cluster -1274 | ADSS                | Adenylosuccinate synthetase isozyme 2                                                      |
| Cluster -1274 | NMT1                | Glycylpeptide N-tetradecanoyltransferase 1                                                 |
| Cluster -1274 | PSMA4               | Proteasome subunit alpha type-4;Proteasome subunit alpha type;Proteasome subunit beta type |
| Cluster -1274 | TIPRL               | TIP41-like protein                                                                         |
| Cluster -1274 | NUDT5               | ADP-sugar pyrophosphatase                                                                  |
| Cluster -1274 | SCAMP2              | Secretory carrier-associated membrane protein 2                                            |
| Cluster -1274 | ADPRHL2             | Poly(ADP-ribose) glycohydrolase ARH3                                                       |
| Cluster -1274 | MAGOH;MAGO HB       | Protein mago nashi homolog;Protein mago nashi homolog 2                                    |
| Cluster -1274 | NDUFV1              | NADH dehydrogenase [ubiquinone] flavoprotein 1, mitochondrial                              |
| Cluster -1274 | CKB                 | Creatine kinase B-type                                                                     |
| Cluster -1274 | TNPO1               | Transportin-1                                                                              |
| Cluster -1241 | GPX8                | Probable glutathione peroxidase 8;Glutathione peroxidase                                   |
| Cluster -1241 | SEC23IP             | SEC23-interacting protein                                                                  |
| Cluster -1241 | COMMD3;COM MD3-BMI1 | COMM domain-containing protein 3                                                           |
| Cluster -1241 | RAB8A               | Ras-related protein Rab-8A                                                                 |
| Cluster -1241 | ZNFX1               | NFX1-type zinc finger-containing protein 1                                                 |
| Cluster -1241 | PMVK                | Phosphomevalonate kinase                                                                   |
| Cluster -1269 | TPBG                | Trophoblast glycoprotein                                                                   |
| Cluster -1269 | LAMB1               | Laminin subunit beta-1                                                                     |
| Cluster -1269 | DNAH9               | Dynein heavy chain 9, axonemal                                                             |
| Cluster -1269 | THOC1               | THO complex subunit 1                                                                      |
| Cluster -1269 | GALC                | Galactocerebrosidase                                                                       |
| Cluster -1269 | ZC3H14              | Zinc finger CCCH domain-containing protein 14                                              |
| Cluster -1269 | TM9SF4              | Transmembrane 9 superfamily member 4                                                       |
| Cluster -1269 | RPL38               | 60S ribosomal protein L38                                                                  |
| Cluster -1269 | TRPV2               | Transient receptor potential cation channel subfamily V member 2                           |
| Cluster -1269 | POFUT1              | GDP-fucose protein O-fucosyltransferase 1                                                  |
| Cluster -1269 | ALDH7A1             | Alpha-aminoadipic semialdehyde dehydrogenase                                               |
| Cluster -1269 | MAPK3               | Mitogen-activated protein kinase 3;Mitogen-activated protein kinase                        |
| Cluster -1269 | FARP1               | FERM, RhoGEF and pleckstrin domain-containing protein 1                                    |

|               |               |                                                                                                                                                                                                                                                                     |
|---------------|---------------|---------------------------------------------------------------------------------------------------------------------------------------------------------------------------------------------------------------------------------------------------------------------|
| Cluster -1269 | THUMPD1       | THUMP domain-containing protein 1                                                                                                                                                                                                                                   |
| Cluster -1269 | STRN4         | Striatin-4                                                                                                                                                                                                                                                          |
| Cluster -1269 | DCPS          | m7GpppX diphosphatase                                                                                                                                                                                                                                               |
| Cluster -1269 | MRC2          | C-type mannose receptor 2                                                                                                                                                                                                                                           |
| Cluster -1269 | DNAJC7        | DnaJ homolog subfamily C member 7                                                                                                                                                                                                                                   |
| Cluster -1269 | ERC1          | ELKS/Rab6-interacting/CAST family member 1                                                                                                                                                                                                                          |
| Cluster -1269 | UFD1L         | Ubiquitin fusion degradation protein 1 homolog                                                                                                                                                                                                                      |
| Cluster -1269 | CTSK          | Cathepsin K                                                                                                                                                                                                                                                         |
| Cluster -1269 | TSNAX;DISC1   | Translin-associated protein X                                                                                                                                                                                                                                       |
| Cluster -1269 | GNA11         | Guanine nucleotide-binding protein subunit alpha-11                                                                                                                                                                                                                 |
| Cluster -1269 | PLXNA4;PLXNA1 | Plexin-A4;Plexin-A1                                                                                                                                                                                                                                                 |
| Cluster -1269 | GLT8D2        | Glycosyltransferase 8 domain-containing protein 2                                                                                                                                                                                                                   |
| Cluster -1269 | CHP1          | Calcineurin B homologous protein 1                                                                                                                                                                                                                                  |
| Cluster -1269 | ZFPL1         | Zinc finger protein-like 1                                                                                                                                                                                                                                          |
| Cluster -1269 | PSMD14        | 26S proteasome non-ATPase regulatory subunit 14                                                                                                                                                                                                                     |
| Cluster -1269 | NDUFA10       | NADH dehydrogenase [ubiquinone] 1 alpha subcomplex subunit 10, mitochondrial                                                                                                                                                                                        |
| Cluster -1269 | IMMT          | MICOS complex subunit MIC60                                                                                                                                                                                                                                         |
| Cluster -1269 | WDR12         | Ribosome biogenesis protein WDR12                                                                                                                                                                                                                                   |
| Cluster -1269 | APP           | Amyloid beta A4 protein;N-APP;Soluble APP-alpha;Soluble APP-beta;C99;Beta-amyloid protein 42;Beta-amyloid protein 40;C83;P3(42);P3(40);C80;Gamma-secretase C-terminal fragment 59;Gamma-secretase C-terminal fragment 57;Gamma-secretase C-terminal fragment 50;C31 |
| Cluster -1269 | ELMOD2        | ELMO domain-containing protein 2                                                                                                                                                                                                                                    |
| Cluster -1269 | ARF5          | ADP-ribosylation factor 5                                                                                                                                                                                                                                           |
| Cluster -1269 | FTSJ3         | pre-rRNA processing protein FTSJ3                                                                                                                                                                                                                                   |
| Cluster -1269 | CCAR2         | Cell cycle and apoptosis regulator protein 2                                                                                                                                                                                                                        |
| Cluster -1269 | NUP188        | Nucleoporin NUP188 homolog                                                                                                                                                                                                                                          |
| Cluster -1269 | MARS          | Methionine--tRNA ligase, cytoplasmic                                                                                                                                                                                                                                |
| Cluster -1269 | MCM4          | DNA replication licensing factor MCM4                                                                                                                                                                                                                               |
| Cluster -1269 | TOR1A         | Torsin-1A                                                                                                                                                                                                                                                           |
| Cluster -1269 | IMPAD1        | Inositol monophosphatase 3                                                                                                                                                                                                                                          |
| Cluster -1269 | UFSP2         | Ufm1-specific protease 2                                                                                                                                                                                                                                            |
| Cluster -1269 | AHCYL1        | Putative adenosylhomocysteinase 2                                                                                                                                                                                                                                   |
| Cluster -1269 | CAD           | CAD protein;Glutamine-dependent carbamoyl-phosphate synthase;Aspartate carbamoyltransferase;Dihydroorotase                                                                                                                                                          |
| Cluster -1269 | CISD2         | CDGSH iron-sulfur domain-containing protein 2                                                                                                                                                                                                                       |
| Cluster -1269 | DCAF7         | DDB1- and CUL4-associated factor 7                                                                                                                                                                                                                                  |
| Cluster -1269 | ATP6V0A1      | V-type proton ATPase 116 kDa subunit a isoform 1;V-type proton ATPase subunit a                                                                                                                                                                                     |
| Cluster -1269 | CAV1          | Caveolin-1;Caveolin                                                                                                                                                                                                                                                 |

|               |             |                                                                                                                                                                        |
|---------------|-------------|------------------------------------------------------------------------------------------------------------------------------------------------------------------------|
| Cluster -1269 | PTGS1       | Prostaglandin G/H synthase 1                                                                                                                                           |
| Cluster -1269 | RAB9A       | Ras-related protein Rab-9A                                                                                                                                             |
| Cluster -1269 | RBM12B      | RNA-binding protein 12B                                                                                                                                                |
| Cluster -1269 | MLST8       | Target of rapamycin complex subunit LST8                                                                                                                               |
| Cluster -1269 | FUT8        | Alpha-(1,6)-fucosyltransferase                                                                                                                                         |
| Cluster -1269 | DDX50       | ATP-dependent RNA helicase DDX50                                                                                                                                       |
| Cluster -1269 | MAGT1       | Magnesium transporter protein 1                                                                                                                                        |
| Cluster -1269 | RBM17       | Splicing factor 45                                                                                                                                                     |
| Cluster -1269 | ATP6AP2     | Renin receptor                                                                                                                                                         |
| Cluster -1269 | DLAT        | Dihydrolipoyllysine-residue acetyltransferase component of pyruvate dehydrogenase complex, mitochondrial;Acetyltransferase component of pyruvate dehydrogenase complex |
| Cluster -1269 | CLASP1      | CLIP-associating protein 1                                                                                                                                             |
| Cluster -1269 | MAN2A1      | Alpha-mannosidase 2                                                                                                                                                    |
| Cluster -1269 | NT5E        | 5-nucleotidase                                                                                                                                                         |
| Cluster -1269 | SOD2        | Superoxide dismutase [Mn], mitochondrial                                                                                                                               |
| Cluster -1269 | CAV2        | Caveolin-2;Caveolin                                                                                                                                                    |
| Cluster -1269 | PVR         | Poliovirus receptor                                                                                                                                                    |
| Cluster -1269 | PON2        | Serum paraoxonase/arylesterase 2                                                                                                                                       |
| Cluster -1269 | RBM4;RBM4B  | RNA-binding protein 4;RNA-binding protein 4B                                                                                                                           |
| Cluster -1269 | EXOC4       | Exocyst complex component 4                                                                                                                                            |
| Cluster -1269 | PLEKHO2     | Pleckstrin homology domain-containing family O member 2                                                                                                                |
| Cluster -1269 | TMEM263     | Transmembrane protein 263                                                                                                                                              |
| Cluster -1269 | HDAC2       | Histone deacetylase 2                                                                                                                                                  |
| Cluster -1269 | TNC         | Tenascin                                                                                                                                                               |
| Cluster -1269 | IGF2R       | Cation-independent mannose-6-phosphate receptor                                                                                                                        |
| Cluster -1269 | LTBP2       | Latent-transforming growth factor beta-binding protein 2                                                                                                               |
| Cluster -1269 | CYR61       | Protein CYR61                                                                                                                                                          |
| Cluster -1269 | TGFBI       | Transforming growth factor-beta-induced protein ig-h3                                                                                                                  |
| Cluster -1269 | GREM1       | Gremlin-1                                                                                                                                                              |
| Cluster -1269 | EMC8        | ER membrane protein complex subunit 8                                                                                                                                  |
| Cluster -1269 | HTRA1       | Serine protease HTRA1                                                                                                                                                  |
| Cluster -1269 | FNDC1       | Fibronectin type III domain-containing protein 1                                                                                                                       |
| Cluster -1269 | BUB3        | Mitotic checkpoint protein BUB3                                                                                                                                        |
| Cluster -1269 | GID8        | Glucose-induced degradation protein 8 homolog                                                                                                                          |
| Cluster -1269 | RAB1B;RAB1C | Ras-related protein Rab-1B;Putative Ras-related protein Rab-1C                                                                                                         |
| Cluster -1269 | AIFM2       | Apoptosis-inducing factor 2                                                                                                                                            |
| Cluster -1269 | ARL8A;ARL8B | ADP-ribosylation factor-like protein 8A;ADP-ribosylation factor-like protein 8B                                                                                        |
| Cluster -1269 | ATP6V1E1    | V-type proton ATPase subunit E 1                                                                                                                                       |

|               |                                 |                                                                                                                                                                  |
|---------------|---------------------------------|------------------------------------------------------------------------------------------------------------------------------------------------------------------|
| Cluster -1269 | PSMD6                           | 26S proteasome non-ATPase regulatory subunit 6                                                                                                                   |
| Cluster -1269 | ENPP4                           | Bis(5-adenosyl)-triphosphatase ENPP4                                                                                                                             |
| Cluster -1269 | MME                             | Neprilysin                                                                                                                                                       |
| Cluster -1269 | TRIP11                          | Thyroid receptor-interacting protein 11                                                                                                                          |
| Cluster -1269 | VPS16                           | Vacuolar protein sorting-associated protein 16 homolog                                                                                                           |
| Cluster -1269 | ERO1L                           | ERO1-like protein alpha                                                                                                                                          |
| Cluster -1269 | RCN3                            | Reticulocalbin-3                                                                                                                                                 |
| Cluster -1269 | DNAJC10                         | DnaJ homolog subfamily C member 10                                                                                                                               |
| Cluster -1269 | DNM1                            | Dynamin-1                                                                                                                                                        |
| Cluster -1269 | RCN1                            | Reticulocalbin-1                                                                                                                                                 |
| Cluster -1269 | SRI                             | Sorcin                                                                                                                                                           |
| Cluster -1269 | TMED9                           | Transmembrane emp24 domain-containing protein 9                                                                                                                  |
| Cluster -1269 | TUBA1A;TUBA3E                   | Tubulin alpha-1A chain;Tubulin alpha-3E chain                                                                                                                    |
| Cluster -1269 | AP2A2                           | AP-2 complex subunit alpha-2                                                                                                                                     |
| Cluster -1269 | COPB1                           | Coatomer subunit beta                                                                                                                                            |
| Cluster -1269 | NXN                             | Nucleoredoxin                                                                                                                                                    |
| Cluster -1269 | OCRL                            | Inositol polyphosphate 5-phosphatase OCRL-1                                                                                                                      |
| Cluster -1269 | PSMC5                           | 26S protease regulatory subunit 8                                                                                                                                |
| Cluster -1269 | EIF4G2                          | Eukaryotic translation initiation factor 4 gamma 2                                                                                                               |
| Cluster -1269 | ITGB5                           | Integrin beta-5;Integrin beta                                                                                                                                    |
| Cluster -1269 | NCKAP1                          | Nck-associated protein 1                                                                                                                                         |
| Cluster -1269 | ATP13A1                         | Manganese-transporting ATPase 13A1                                                                                                                               |
| Cluster -1269 | ASCC3                           | Activating signal cointegrator 1 complex subunit 3                                                                                                               |
| Cluster -1269 | RPL3                            | 60S ribosomal protein L3                                                                                                                                         |
| Cluster -1269 | MTHFD1L                         | Monofunctional C1-tetrahydrofolate synthase, mitochondrial                                                                                                       |
| Cluster -1269 | DAK;TKFC                        | Bifunctional ATP-dependent dihydroxyacetone kinase/FAD-AMP lyase (cyclizing);ATP-dependent dihydroxyacetone kinase;FAD-AMP lyase (cyclizing)                     |
| Cluster -1269 | ACOT9                           | Acyl-coenzyme A thioesterase 9, mitochondrial                                                                                                                    |
| Cluster -1269 | GLG1                            | Golgi apparatus protein 1                                                                                                                                        |
| Cluster -1269 | RPL17;RPL17-C18orf32            | 60S ribosomal protein L17                                                                                                                                        |
| Cluster -1269 | ALDH3A2;ALDH3A1;ALDH3B2;ALDH3B1 | Fatty aldehyde dehydrogenase;Aldehyde dehydrogenase, dimeric NADP-preferring;Aldehyde dehydrogenase family 3 member B1;Aldehyde dehydrogenase family 3 member B2 |
| Cluster -1269 | PDS5B                           | Sister chromatid cohesion protein PDS5 homolog B                                                                                                                 |
| Cluster -1269 | TM9SF2                          | Transmembrane 9 superfamily member 2                                                                                                                             |
| Cluster -1269 | ITGB1                           | Integrin beta-1                                                                                                                                                  |
| Cluster -1269 | DDX19A;DDX19B                   | ATP-dependent RNA helicase DDX19A;ATP-dependent RNA helicase DDX19B                                                                                              |
| Cluster -1269 | RPL21                           | 60S ribosomal protein L21                                                                                                                                        |
| Cluster -1269 | CD109                           | CD109 antigen                                                                                                                                                    |

|               |                    |                                                                                                    |
|---------------|--------------------|----------------------------------------------------------------------------------------------------|
| Cluster -1269 | TMED7;TMED7-TICAM2 | Transmembrane emp24 domain-containing protein 7                                                    |
| Cluster -1269 | STAT6              | Signal transducer and activator of transcription 6                                                 |
| Cluster -1269 | TMX3               | Protein disulfide-isomerase TMX3                                                                   |
| Cluster -1269 | TRIP13             | Pachytene checkpoint protein 2 homolog                                                             |
| Cluster -1269 | TNFAIP2            | Tumor necrosis factor alpha-induced protein 2                                                      |
| Cluster -1269 | PRKDC              | DNA-dependent protein kinase catalytic subunit                                                     |
| Cluster -1269 | COL6A3             | Collagen alpha-3(VI) chain                                                                         |
| Cluster -1269 | PRKRA              | Interferon-inducible double-stranded RNA-dependent protein kinase activator A                      |
| Cluster -1269 | H6PD               | GDH/6PGL endoplasmic bifunctional protein;Glucose 1-dehydrogenase;6-phosphogluconolactonase        |
| Cluster -1269 | NOP58              | Nucleolar protein 58                                                                               |
| Cluster -1269 | RALY               | RNA-binding protein Raly                                                                           |
| Cluster -1269 | EFTUD2             | 116 kDa U5 small nuclear ribonucleoprotein component                                               |
| Cluster -1269 | DHX9               | ATP-dependent RNA helicase A                                                                       |
| Cluster -1269 | FBL                | rRNA 2-O-methyltransferase fibrillarin                                                             |
| Cluster -1269 | PFKL               | ATP-dependent 6-phosphofructokinase, liver type                                                    |
| Cluster -1269 | XRCC5              | X-ray repair cross-complementing protein 5                                                         |
| Cluster -1269 | RPL9               | 60S ribosomal protein L9                                                                           |
| Cluster -1269 | SNRNP200           | U5 small nuclear ribonucleoprotein 200 kDa helicase                                                |
| Cluster -1269 | SUN2               | SUN domain-containing protein 2                                                                    |
| Cluster -1269 | CAT                | Catalase                                                                                           |
| Cluster -1269 | SLMAP              | Sarcolemmal membrane-associated protein                                                            |
| Cluster -1269 | NRP1               | Neuropilin-1                                                                                       |
| Cluster -1269 | ARMCX2             | Armadillo repeat-containing X-linked protein 2                                                     |
| Cluster -1269 | CPOX               | Oxygen-dependent coproporphyrinogen-III oxidase, mitochondrial                                     |
| Cluster -1269 | LACTB              | Serine beta-lactamase-like protein LACTB, mitochondrial                                            |
| Cluster -1269 | NOL9               | Polynucleotide 5-hydroxyl-kinase NOL9                                                              |
| Cluster -1269 | CPT1A              | Carnitine O-palmitoyltransferase 1, liver isoform                                                  |
| Cluster -1269 | TEP1               | Telomerase protein component 1                                                                     |
| Cluster -1269 | SOAT1              | Sterol O-acyltransferase 1                                                                         |
| Cluster -1269 | HSD17B4            | Peroxisomal multifunctional enzyme type 2;(3R)-hydroxyacyl-CoA dehydrogenase;Enoyl-CoA hydratase 2 |
| Cluster -1269 | EDIL3              | EGF-like repeat and discoidin I-like domain-containing protein 3                                   |
| Cluster -1269 | EIF2AK2            | Interferon-induced, double-stranded RNA-activated protein kinase                                   |
| Cluster -1269 | ALDH1B1            | Aldehyde dehydrogenase X, mitochondrial                                                            |
| Cluster -1269 | UGGT2              | UDP-glucose:glycoprotein glucosyltransferase 2                                                     |
| Cluster -1269 | PRDX4              | Peroxiredoxin-4                                                                                    |
| Cluster -1269 | VTA1               | Vacuolar protein sorting-associated protein VTA1 homolog                                           |



|               |          |                                                                                                                               |
|---------------|----------|-------------------------------------------------------------------------------------------------------------------------------|
| Cluster -1269 | NSF      | Vesicle-fusing ATPase                                                                                                         |
| Cluster -1269 | TCIRG1   | V-type proton ATPase 116 kDa subunit a isoform 3;V-type proton ATPase subunit a                                               |
| Cluster -1269 | STAT3    | Signal transducer and activator of transcription 3;Signal transducer and activator of transcription                           |
| Cluster -1269 | GAA      | Lysosomal alpha-glucosidase;76 kDa lysosomal alpha-glucosidase;70 kDa lysosomal alpha-glucosidase                             |
| Cluster -1269 | SCARB2   | Lysosome membrane protein 2                                                                                                   |
| Cluster -1269 | CYB5R3   | NADH-cytochrome b5 reductase 3;NADH-cytochrome b5 reductase 3 membrane-bound form;NADH-cytochrome b5 reductase 3 soluble form |
| Cluster -1269 | SDF2     | Stromal cell-derived factor 2                                                                                                 |
| Cluster -1269 | LCLAT1   | Lysocardiolipin acyltransferase 1                                                                                             |
| Cluster -1269 | MFGE8    | Lactadherin;Lactadherin short form;Medin                                                                                      |
| Cluster -1269 | SPTLC1   | Serine palmitoyltransferase 1                                                                                                 |
| Cluster -1269 | GLB1     | Beta-galactosidase                                                                                                            |
| Cluster -1269 | MYO1D    | Unconventional myosin-Id                                                                                                      |
| Cluster -1269 | SPRYD7   | SPRY domain-containing protein 7                                                                                              |
| Cluster -1269 | SLC44A1  | Choline transporter-like protein 1                                                                                            |
| Cluster -1269 | ANXA11   | Annexin A11                                                                                                                   |
| Cluster -1269 | MYL6B    | Myosin light chain 6B                                                                                                         |
| Cluster -1269 | CD276    | CD276 antigen                                                                                                                 |
| Cluster -1269 | CNPY4    | Protein canopy homolog 4                                                                                                      |
| Cluster -1269 | FKBP7    | Peptidyl-prolyl cis-trans isomerase FKBP7                                                                                     |
| Cluster -1269 | DNAJB11  | DnaJ homolog subfamily B member 11                                                                                            |
| Cluster -1269 | ABCC4    | Multidrug resistance-associated protein 4                                                                                     |
| Cluster -1269 | GBA      | Glucosylceramidase                                                                                                            |
| Cluster -1269 | EXOC6B   | Exocyst complex component 6B                                                                                                  |
| Cluster -1269 | CLCC1    | Chloride channel CLIC-like protein 1                                                                                          |
| Cluster -1269 | DNAJC3   | DnaJ homolog subfamily C member 3                                                                                             |
| Cluster -1269 | HSD17B12 | Very-long-chain 3-oxoacyl-CoA reductase                                                                                       |
| Cluster -1269 | RDH11    | Retinol dehydrogenase 11                                                                                                      |
| Cluster -1269 | NOTCH2   | Neurogenic locus notch homolog protein 2;Notch 2 extracellular truncation;Notch 2 intracellular domain                        |
| Cluster -1269 | PTPN1    | Tyrosine-protein phosphatase non-receptor type 1;Tyrosine-protein phosphatase non-receptor type                               |
| Cluster -1269 | AP2S1    | AP-2 complex subunit sigma                                                                                                    |
| Cluster -1269 | MECR     | Trans-2-enoyl-CoA reductase, mitochondrial                                                                                    |
| Cluster -1269 | MTX2     | Metaxin-2                                                                                                                     |
| Cluster -1269 | NAA15    | N-alpha-acetyltransferase 15, NatA auxiliary subunit                                                                          |
| Cluster -1269 | NOP56    | Nucleolar protein 56                                                                                                          |
| Cluster -1269 | ESYT1    | Extended synaptotagmin-1                                                                                                      |
| Cluster -1269 | ADPGK    | ADP-dependent glucokinase                                                                                                     |

|               |          |                                                                                |
|---------------|----------|--------------------------------------------------------------------------------|
| Cluster -1269 | FAF2     | FAS-associated factor 2                                                        |
| Cluster -1269 | IKBIP    | Inhibitor of nuclear factor kappa-B kinase-interacting protein                 |
| Cluster -1269 | GANAB    | Neutral alpha-glucosidase AB                                                   |
| Cluster -1269 | LMAN2    | Vesicular integral-membrane protein VIP36                                      |
| Cluster -1269 | CALR     | Calreticulin                                                                   |
| Cluster -1269 | CYB5B    | Cytochrome b5 type B                                                           |
| Cluster -1269 | HNRNPUL1 | Heterogeneous nuclear ribonucleoprotein U-like protein 1                       |
| Cluster -1269 | LPAR1    | Lysophosphatidic acid receptor 1                                               |
| Cluster -1269 | CYB5R1   | NADH-cytochrome b5 reductase 1                                                 |
| Cluster -1269 | TECR     | Very-long-chain enoyl-CoA reductase                                            |
| Cluster -1269 | TM9SF3   | Transmembrane 9 superfamily member 3                                           |
| Cluster -1269 | TMED4    | Transmembrane emp24 domain-containing protein 4                                |
| Cluster -1269 | REEP5    | Receptor expression-enhancing protein 5                                        |
| Cluster -1269 | SPNS1    | Protein spinster homolog 1                                                     |
| Cluster -1269 | RAB2A    | Ras-related protein Rab-2A                                                     |
| Cluster -1269 | AK3      | GTP:AMP phosphotransferase AK3, mitochondrial                                  |
| Cluster -1269 | ERP44    | Endoplasmic reticulum resident protein 44                                      |
| Cluster -1269 | HIBCH    | 3-hydroxyisobutyryl-CoA hydrolase, mitochondrial                               |
| Cluster -1269 | TMED1    | Transmembrane emp24 domain-containing protein 1                                |
| Cluster -1269 | SHMT2    | Serine hydroxymethyltransferase, mitochondrial;Serine hydroxymethyltransferase |
| Cluster -1269 | NDUFC2   | NADH dehydrogenase [ubiquinone] 1 subunit C2                                   |
| Cluster -1269 | NUP85    | Nuclear pore complex protein Nup85                                             |
| Cluster -1269 | CLCN7    | H(+)/Cl(-) exchange transporter 7                                              |
| Cluster -1269 | SPCS2    | Signal peptidase complex subunit 2                                             |
| Cluster -1269 | MSRB3    | Methionine-R-sulfoxide reductase B3                                            |
| Cluster -1269 | IFNL1    | Interferon lambda-1                                                            |
| Cluster -1269 | ATL3     | Atlastin-3                                                                     |
| Cluster -1269 | KIAA0020 | Pumilio domain-containing protein KIAA0020                                     |
| Cluster -1269 | ANGPT1   | Angiopoietin-1                                                                 |
| Cluster -1269 | TMED2    | Transmembrane emp24 domain-containing protein 2                                |
| Cluster -1269 | RPN2     | Dolichyl-diphosphooligosaccharide--protein glycosyltransferase subunit 2       |
| Cluster -1269 | BSG      | Basigin                                                                        |
| Cluster -1269 | RPN1     | Dolichyl-diphosphooligosaccharide--protein glycosyltransferase subunit 1       |
| Cluster -1269 | SRPRB    | Signal recognition particle receptor subunit beta                              |
| Cluster -1269 | NDUFAF4  | NADH dehydrogenase [ubiquinone] 1 alpha subcomplex assembly factor 4           |
| Cluster -1269 | ANO10    | Anoctamin-10                                                                   |
| Cluster -1269 | SLFN5    | Schlafen family member 5                                                       |
| Cluster -1269 | LRP1     | Prolow-density lipoprotein receptor-related protein 1;Low-                     |

|               |          |                                                                                                                                                                                                          |
|---------------|----------|----------------------------------------------------------------------------------------------------------------------------------------------------------------------------------------------------------|
|               |          | density lipoprotein receptor-related protein 1 85 kDa subunit;Low-density lipoprotein receptor-related protein 1 515 kDa subunit;Low-density lipoprotein receptor-related protein 1 intracellular domain |
| Cluster -1269 | ERGIC2   | Endoplasmic reticulum-Golgi intermediate compartment protein 2                                                                                                                                           |
| Cluster -1269 | AGPS     | Alkyldihydroxyacetonephosphate synthase, peroxisomal                                                                                                                                                     |
| Cluster -1269 | SLC12A4  | Solute carrier family 12 member 4                                                                                                                                                                        |
| Cluster -1269 | SEC63    | Translocation protein SEC63 homolog                                                                                                                                                                      |
| Cluster -1269 | SEL1L    | Protein sel-1 homolog 1                                                                                                                                                                                  |
| Cluster -1269 | UGGT1    | UDP-glucose:glycoprotein glucosyltransferase 1                                                                                                                                                           |
| Cluster -1269 | SLC38A10 | Putative sodium-coupled neutral amino acid transporter 10                                                                                                                                                |
| Cluster -1269 | NCLN     | Nicalin                                                                                                                                                                                                  |
| Cluster -1269 | EMC1     | ER membrane protein complex subunit 1                                                                                                                                                                    |
| Cluster -1269 | MMGT1    | Membrane magnesium transporter 1                                                                                                                                                                         |
| Cluster -1269 | ODR4     | Protein odr-4 homolog                                                                                                                                                                                    |
| Cluster -1269 | MOGS     | Mannosyl-oligosaccharide glucosidase                                                                                                                                                                     |
| Cluster -1269 | STT3A    | Dolichyl-diphosphooligosaccharide--protein glycosyltransferase subunit STT3A                                                                                                                             |
| Cluster -1269 | LRPAP1   | Alpha-2-macroglobulin receptor-associated protein                                                                                                                                                        |
| Cluster -1269 | TOR1B    | Torsin-1B                                                                                                                                                                                                |
| Cluster -1269 | GPR108   | Protein GPR108                                                                                                                                                                                           |
| Cluster -1269 | SLC39A14 | Zinc transporter ZIP14                                                                                                                                                                                   |
| Cluster -1269 | SLC12A7  | Solute carrier family 12 member 7                                                                                                                                                                        |
| Cluster -1269 | PREB     | Prolactin regulatory element-binding protein                                                                                                                                                             |
| Cluster -1269 | GSTK1    | Glutathione S-transferase kappa 1                                                                                                                                                                        |
| Cluster -1269 | OS9      | Protein OS-9                                                                                                                                                                                             |
| Cluster -1269 | ATP5F1   | ATP synthase F(0) complex subunit B1, mitochondrial                                                                                                                                                      |
| Cluster -1269 | GLS      | Glutaminase kidney isoform, mitochondrial                                                                                                                                                                |
| Cluster -1269 | SACM1L   | Phosphatidylinositide phosphatase SAC1                                                                                                                                                                   |
| Cluster -1269 | ATP6V0D1 | V-type proton ATPase subunit d 1                                                                                                                                                                         |
| Cluster -1269 | ARMCX3   | Armadillo repeat-containing X-linked protein 3                                                                                                                                                           |
| Cluster -1269 | TMEM43   | Transmembrane protein 43                                                                                                                                                                                 |
| Cluster -1269 | ERGIC1   | Endoplasmic reticulum-Golgi intermediate compartment protein 1                                                                                                                                           |
| Cluster -1269 | ABCD3    | ATP-binding cassette sub-family D member 3                                                                                                                                                               |
| Cluster -1269 | LMAN1    | Protein ERGIC-53                                                                                                                                                                                         |
| Cluster -1269 | ALG2     | Alpha-1,3/1,6-mannosyltransferase ALG2                                                                                                                                                                   |
| Cluster -1269 | SNTB2    | Beta-2-syntrophin                                                                                                                                                                                        |
| Cluster -1269 | CLDN11   | Claudin-11;Claudin                                                                                                                                                                                       |
| Cluster -1269 | ARHGEF11 | Rho guanine nucleotide exchange factor 11                                                                                                                                                                |
| Cluster -1269 | TBL1XR1  | F-box-like/WD repeat-containing protein TBL1XR1                                                                                                                                                          |

|               |             |                                                                               |
|---------------|-------------|-------------------------------------------------------------------------------|
| Cluster -1269 | CLPTM1L     | N/A                                                                           |
| Cluster -1269 | PEX11B      | Peroxisomal membrane protein 11B                                              |
| Cluster -1269 | NUCB1       | Nucleobindin-1                                                                |
| Cluster -1269 | MANF        | Mesencephalic astrocyte-derived neurotrophic factor                           |
| Cluster -1269 | SERPINH1    | Serpin H1                                                                     |
| Cluster -1269 | P4HB        | Protein disulfide-isomerase                                                   |
| Cluster -1269 | CALU        | Calumenin                                                                     |
| Cluster -1269 | COL5A2      | Collagen alpha-2(V) chain                                                     |
| Cluster -1269 | APMAP       | Adipocyte plasma membrane-associated protein                                  |
| Cluster -1269 | ATL1        | Atlastin-1                                                                    |
| Cluster -1269 | PDIA5       | Protein disulfide-isomerase A5                                                |
| Cluster -1269 | SLC25A1     | Tricarboxylate transport protein, mitochondrial                               |
| Cluster -1269 | GMPS        | GMP synthase [glutamine-hydrolyzing]                                          |
| Cluster -1269 | CANX        | Calnexin                                                                      |
| Cluster -1269 | ALCAM       | CD166 antigen                                                                 |
| Cluster -1269 | NOMO2;NOMO3 | Nodal modulator 2;Nodal modulator 3                                           |
| Cluster -1269 | CKAP4       | Cytoskeleton-associated protein 4                                             |
| Cluster -1269 | PLOD1       | Procollagen-lysine,2-oxoglutarate 5-dioxygenase 1                             |
| Cluster -1269 | SSR4        | Translocon-associated protein subunit delta                                   |
| Cluster -1269 | PRPF6       | Pre-mRNA-processing factor 6                                                  |
| Cluster -1269 | AP3B1       | AP-3 complex subunit beta-1                                                   |
| Cluster -1269 | SUMF2       | Sulfatase-modifying factor 2                                                  |
| Cluster -1269 | HMOX2       | Heme oxygenase 2                                                              |
| Cluster -1269 | STON2       | Stonin-2                                                                      |
| Cluster -1269 | COLGALT1    | Procollagen galactosyltransferase 1                                           |
| Cluster -1269 | LEPRE1      | Prolyl 3-hydroxylase 1                                                        |
| Cluster -1269 | HM13        | Minor histocompatibility antigen H13                                          |
| Cluster -1269 | C17orf62    | Uncharacterized protein C17orf62                                              |
| Cluster -1269 | P4HA1       | Prolyl 4-hydroxylase subunit alpha-1                                          |
| Cluster -1269 | P4HA2       | Prolyl 4-hydroxylase subunit alpha-2                                          |
| Cluster -1269 | SLC16A3     | Monocarboxylate transporter 4                                                 |
| Cluster -1269 | UBTF        | Nucleolar transcription factor 1                                              |
| Cluster -1269 | RSL1D1      | Ribosomal L1 domain-containing protein 1                                      |
| Cluster -1269 | PXDN        | Peroxidasin homolog                                                           |
| Cluster -1269 | TMED10      | Transmembrane emp24 domain-containing protein 10                              |
| Cluster -1269 | ATP2A2      | Sarcoplasmic/endoplasmic reticulum calcium ATPase 2                           |
| Cluster -1269 | RER1        | Protein RER1                                                                  |
| Cluster -1269 | DDOST       | Dolichyl-diphosphooligosaccharide--protein glycosyltransferase 48 kDa subunit |
| Cluster -1269 | SLC39A7     | Zinc transporter SLC39A7                                                      |
| Cluster -1269 | NCBP1       | Nuclear cap-binding protein subunit 1                                         |

|               |                   |                                                                                                                  |
|---------------|-------------------|------------------------------------------------------------------------------------------------------------------|
| Cluster -1269 | FBN1              | Fibrillin-1                                                                                                      |
| Cluster -1269 | GFM2              | Ribosome-releasing factor 2, mitochondrial                                                                       |
| Cluster -1269 | GNAI2             | Guanine nucleotide-binding protein G(i) subunit alpha-2                                                          |
| Cluster -1269 | MYADM             | Myeloid-associated differentiation marker                                                                        |
| Cluster -1269 | UTP14A;UTP14<br>C | U3 small nucleolar RNA-associated protein 14 homolog<br>A;U3 small nucleolar RNA-associated protein 14 homolog C |
| Cluster -1269 | PLOD3             | Procollagen-lysine,2-oxoglutarate 5-dioxygenase 3                                                                |
| Cluster -1269 | DHRS3             | Short-chain dehydrogenase/reductase 3                                                                            |
| Cluster -1269 | TYMP              | Thymidine phosphorylase                                                                                          |
| Cluster -1269 | ACOX1             | Peroxisomal acyl-coenzyme A oxidase 1                                                                            |
| Cluster -1269 | STT3B             | Dolichyl-diphosphooligosaccharide--protein<br>glycosyltransferase subunit STT3B                                  |
| Cluster -1269 | PDIA6             | Protein disulfide-isomerase A6                                                                                   |
| Cluster -1269 | NUCB2;Nucb2       | Nucleobindin-2;Nesfatin-1                                                                                        |
| Cluster -1269 | LAMP1             | Lysosome-associated membrane glycoprotein 1                                                                      |
| Cluster -1269 | PDIA4             | Protein disulfide-isomerase A4                                                                                   |
| Cluster -1269 | ERLEC1            | Endoplasmic reticulum lectin 1                                                                                   |
| Cluster -1269 | IKBIP             | Inhibitor of nuclear factor kappa-B kinase-interacting protein                                                   |
| Cluster -1269 | MLEC              | Malectin                                                                                                         |
| Cluster -1269 | ITGAV             | Integrin alpha-V;Integrin alpha-V heavy chain;Integrin<br>alpha-V light chain                                    |
| Cluster -1269 | MT-ND5            | NADH-ubiquinone oxidoreductase chain 5                                                                           |
| Cluster -1269 | PTRH2             | Peptidyl-tRNA hydrolase 2, mitochondrial                                                                         |
| Cluster -1269 | HYOU1             | Hypoxia up-regulated protein 1                                                                                   |
| Cluster -1269 | SEC11A            | Signal peptidase complex catalytic subunit SEC11A;Signal<br>peptidase complex catalytic subunit SEC11            |
| Cluster -1269 | VANGL1            | Vang-like protein 1                                                                                              |
| Cluster -1269 | MTDH              | Protein LYRIC                                                                                                    |
| Cluster -1269 | SSR1              | Translocon-associated protein subunit alpha                                                                      |
| Cluster -1269 | ACOX3             | Peroxisomal acyl-coenzyme A oxidase 3                                                                            |
| Cluster -1269 | C1QTNF5           | Complement C1q tumor necrosis factor-related protein 5                                                           |
| Cluster -1269 | MIA3              | Melanoma inhibitory activity protein 3                                                                           |
| Cluster -1269 | SPARC             | SPARC                                                                                                            |
| Cluster -1269 | COL5A1            | Collagen alpha-1(V) chain                                                                                        |
| Cluster -1269 | SLC25A6           | ADP/ATP translocase 3;ADP/ATP translocase 3, N-<br>terminally processed                                          |
| Cluster -1269 | HSPD1             | 60 kDa heat shock protein, mitochondrial                                                                         |
| Cluster -1269 | FKBP9             | Peptidyl-prolyl cis-trans isomerase FKBP9                                                                        |
| Cluster -1269 | LETM1             | LETM1 and EF-hand domain-containing protein 1,<br>mitochondrial                                                  |
| Cluster -1269 | SFXN1             | Sideroflexin-1                                                                                                   |
| Cluster -1269 | SELM              | Selenoprotein M                                                                                                  |
| Cluster -1269 | ATP5J2;ATP5J2-    | ATP synthase subunit f, mitochondrial                                                                            |

|               |          |                                                                                                |
|---------------|----------|------------------------------------------------------------------------------------------------|
|               | PTCD1    |                                                                                                |
| Cluster -1269 | GALNT5   | Polypeptide N-acetylgalactosaminyltransferase 5                                                |
| Cluster -1269 | TRAP1    | Heat shock protein 75 kDa, mitochondrial                                                       |
| Cluster -1269 | LAMB2    | Laminin subunit beta-2                                                                         |
| Cluster -1269 | SEC61A1  | Protein transport protein Sec61 subunit alpha isoform 1                                        |
| Cluster -1269 | FLOT1    | Flotillin-1                                                                                    |
| Cluster -1269 | NDUFS1   | NADH-ubiquinone oxidoreductase 75 kDa subunit, mitochondrial                                   |
| Cluster -1269 | SLC25A5  | ADP/ATP translocase 2;ADP/ATP translocase 2, N-terminally processed                            |
| Cluster -1269 | ATAD3A   | ATPase family AAA domain-containing protein 3A                                                 |
| Cluster -1269 | PITRM1   | Presequence protease, mitochondrial                                                            |
| Cluster -1269 | UQCRC1   | Cytochrome b-c1 complex subunit 1, mitochondrial                                               |
| Cluster -1269 | NDUFS2   | NADH dehydrogenase [ubiquinone] iron-sulfur protein 2, mitochondrial                           |
| Cluster -1269 | SUN1     | SUN domain-containing protein 1                                                                |
| Cluster -1269 | PHB2     | Prohibitin-2                                                                                   |
| Cluster -1269 | COL12A1  | Collagen alpha-1(XII) chain                                                                    |
| Cluster -1269 | PCYOX1   | Prenylcysteine oxidase 1                                                                       |
| Cluster -1269 | NDUFA13  | NADH dehydrogenase [ubiquinone] 1 alpha subcomplex subunit 13                                  |
| Cluster -1269 | IARS2    | Isoleucine--tRNA ligase, mitochondrial                                                         |
| Cluster -1269 | DIABLO   | Diablo homolog, mitochondrial                                                                  |
| Cluster -1269 | SLC25A24 | Calcium-binding mitochondrial carrier protein SCA1                                             |
| Cluster -1269 | NDUFA9   | NADH dehydrogenase [ubiquinone] 1 alpha subcomplex subunit 9, mitochondrial                    |
| Cluster -1269 | NNT      | NAD(P) transhydrogenase, mitochondrial                                                         |
| Cluster -1269 | LUM      | Lumican                                                                                        |
| Cluster -1269 | ATP5C1   | ATP synthase subunit gamma, mitochondrial                                                      |
| Cluster -1269 | ATP5A1   | ATP synthase subunit alpha, mitochondrial                                                      |
| Cluster -1269 | AIFM1    | Apoptosis-inducing factor 1, mitochondrial                                                     |
| Cluster -1269 | LONP1    | Lon protease homolog, mitochondrial                                                            |
| Cluster -1269 | DHRS4    | Dehydrogenase/reductase SDR family member 4                                                    |
| Cluster -1269 | ATP6AP1  | V-type proton ATPase subunit S1                                                                |
| Cluster -1269 | NCEH1    | Neutral cholesterol ester hydrolase 1                                                          |
| Cluster -1269 | ACAA2    | 3-ketoacyl-CoA thiolase, mitochondrial                                                         |
| Cluster -1269 | SAMM50   | Sorting and assembly machinery component 50 homolog                                            |
| Cluster -1269 | IMMT     | MICOS complex subunit MIC60                                                                    |
| Cluster -1269 | NDUFA5   | NADH dehydrogenase [ubiquinone] 1 alpha subcomplex subunit 5                                   |
| Cluster -1269 | ALDH18A1 | Delta-1-pyrroline-5-carboxylate synthase;Glutamate 5-kinase;Gamma-glutamyl phosphate reductase |
| Cluster -1269 | COX4I1   | Cytochrome c oxidase subunit 4 isoform 1, mitochondrial                                        |

|               |          |                                                                                                                             |
|---------------|----------|-----------------------------------------------------------------------------------------------------------------------------|
| Cluster -1269 | EPHX1    | Epoxide hydrolase 1                                                                                                         |
| Cluster -1269 | ATP5B    | ATP synthase subunit beta, mitochondrial;ATP synthase subunit beta                                                          |
| Cluster -1269 | OAT      | Ornithine aminotransferase, mitochondrial;Ornithine aminotransferase, hepatic form;Ornithine aminotransferase, renal form   |
| Cluster -1269 | OPA1     | Dynamin-like 120 kDa protein, mitochondrial;Dynamin-like 120 kDa protein, form S1                                           |
| Cluster -1269 | GLS      | Glutaminase kidney isoform, mitochondrial                                                                                   |
| Cluster -1269 | MTCH2    | Mitochondrial carrier homolog 2                                                                                             |
| Cluster -1269 | VDAC3    | Voltage-dependent anion-selective channel protein 3                                                                         |
| Cluster -1269 | UQCRC2   | Cytochrome b-c1 complex subunit 2, mitochondrial                                                                            |
| Cluster -1269 | ETFA     | Electron transfer flavoprotein subunit alpha, mitochondrial                                                                 |
| Cluster -1269 | CYC1     | Cytochrome c1, heme protein, mitochondrial                                                                                  |
| Cluster -1269 | CS       | Citrate synthase, mitochondrial;Citrate synthase                                                                            |
| Cluster -1269 | OGDH     | 2-oxoglutarate dehydrogenase, mitochondrial                                                                                 |
| Cluster -1269 | DECR1    | 2,4-dienoyl-CoA reductase, mitochondrial                                                                                    |
| Cluster -1269 | ACADVL   | Very long-chain specific acyl-CoA dehydrogenase, mitochondrial                                                              |
| Cluster -1269 | LRPPRC   | Leucine-rich PPR motif-containing protein, mitochondrial                                                                    |
| Cluster -1269 | PHB      | Prohibitin                                                                                                                  |
| Cluster -1269 | SDHB     | Succinate dehydrogenase [ubiquinone] iron-sulfur subunit, mitochondrial                                                     |
| Cluster -1269 | DLD      | Dihydrolipoyl dehydrogenase, mitochondrial;Dihydrolipoyl dehydrogenase                                                      |
| Cluster -1269 | MYOF     | Myoferlin                                                                                                                   |
| Cluster -1269 | ACAD9    | Acyl-CoA dehydrogenase family member 9, mitochondrial                                                                       |
| Cluster -1269 | HADHB    | Trifunctional enzyme subunit beta, mitochondrial;3-ketoacyl-CoA thiolase                                                    |
| Cluster -1269 | HADHA    | Trifunctional enzyme subunit alpha, mitochondrial;Long-chain enoyl-CoA hydratase;Long chain 3-hydroxyacyl-CoA dehydrogenase |
| Cluster -1269 | NFU1     | NFU1 iron-sulfur cluster scaffold homolog, mitochondrial                                                                    |
| Cluster -1269 | PIGK     | GPI-anchor transamidase                                                                                                     |
| Cluster -1269 | APOOL    | MICOS complex subunit MIC27                                                                                                 |
| Cluster -1269 | SFXN3    | Sideroflexin-3                                                                                                              |
| Cluster -1269 | C21orf33 | N/A                                                                                                                         |
| Cluster -1269 | ATP6V1D  | V-type proton ATPase subunit D                                                                                              |
| Cluster -1269 | ITGA11   | Integrin alpha-11                                                                                                           |
| Cluster -1269 | IGFBP7   | Insulin-like growth factor-binding protein 7                                                                                |
| Cluster -1269 | EHHADH   | Peroxisomal bifunctional enzyme;Enoyl-CoA hydratase/3,2-trans-enoyl-CoA isomerase;3-hydroxyacyl-CoA dehydrogenase           |
| Cluster -1269 | CD151    | CD151 antigen;Tetraspanin                                                                                                   |

|               |             |                                                                                   |
|---------------|-------------|-----------------------------------------------------------------------------------|
| Cluster -1269 | N/A         | N/A                                                                               |
| Cluster -1269 | DNAJC5      | DnaJ homolog subfamily C member 5                                                 |
| Cluster -1269 | ATP5J       | ATP synthase-coupling factor 6, mitochondrial                                     |
| Cluster -1269 | HSP90B1     | Endoplasmic                                                                       |
| Cluster -1269 | DNAJC13     | DnaJ homolog subfamily C member 13                                                |
| Cluster -1269 | LAMP2       | Lysosome-associated membrane glycoprotein 2                                       |
| Cluster -1269 | HSD17B10    | 3-hydroxyacyl-CoA dehydrogenase type-2                                            |
| Cluster -1269 | DNAJA3      | DnaJ homolog subfamily A member 3, mitochondrial                                  |
| Cluster -1269 | TRIM60      | Tripartite motif-containing protein 60                                            |
| Cluster -1269 | MT-CO2      | Cytochrome c oxidase subunit 2                                                    |
| Cluster -1269 | CCDC90B     | Coiled-coil domain-containing protein 90B, mitochondrial                          |
| Cluster -1269 | SLC25A11    | Mitochondrial 2-oxoglutarate/malate carrier protein                               |
| Cluster -1269 | SUCLG1      | Succinyl-CoA ligase [ADP/GDP-forming] subunit alpha, mitochondrial                |
| Cluster -1269 | ACO2        | Aconitate hydratase, mitochondrial                                                |
| Cluster -1269 | PRDX3       | Thioredoxin-dependent peroxide reductase, mitochondrial                           |
| Cluster -1269 | PI4KA       | Phosphatidylinositol 4-kinase alpha                                               |
| Cluster -1269 | PRKAG1      | 5-AMP-activated protein kinase subunit gamma-1                                    |
| Cluster -1269 | POLR2C      | DNA-directed RNA polymerase II subunit RPB3                                       |
| Cluster -1269 | ATP1B3      | Sodium/potassium-transporting ATPase subunit beta-3                               |
| Cluster -1269 | GPD2        | Glycerol-3-phosphate dehydrogenase, mitochondrial                                 |
| Cluster -1269 | WDR18       | WD repeat-containing protein 18                                                   |
| Cluster -1269 | C16orf58    | RUS1 family protein C16orf58                                                      |
| Cluster -1269 | CEMP1       | Cell migration-inducing and hyaluronan-binding protein                            |
| Cluster -1269 | MCFD2       | Multiple coagulation factor deficiency protein 2                                  |
| Cluster -1269 | FAP         | Prolyl endopeptidase FAP;Antiplasmin-cleaving enzyme FAP, soluble form            |
| Cluster -1269 | RRAS2       | Ras-related protein R-Ras2                                                        |
| Cluster -1269 | TUFM        | Elongation factor Tu, mitochondrial                                               |
| Cluster -1269 | PRCP        | Lysosomal Pro-X carboxypeptidase                                                  |
| Cluster -1269 | ATP6V1A     | V-type proton ATPase catalytic subunit A                                          |
| Cluster -1269 | B2M         | Beta-2-microglobulin;Beta-2-microglobulin form pI 5.3                             |
| Cluster -1269 | PDGFRB      | Platelet-derived growth factor receptor beta                                      |
| Cluster -1269 | GLUD1;GLUD2 | Glutamate dehydrogenase 1, mitochondrial;Glutamate dehydrogenase 2, mitochondrial |
| Cluster -1269 | HADH        | Hydroxyacyl-coenzyme A dehydrogenase, mitochondrial                               |
| Cluster -1269 | SDF4        | 45 kDa calcium-binding protein                                                    |
| Cluster -1269 | IFI16       | Gamma-interferon-inducible protein 16                                             |
| Cluster -1269 | ANPEP       | Aminopeptidase N                                                                  |
| Cluster -1269 | RRAS        | Ras-related protein R-Ras                                                         |
| Cluster -1269 | TOP2B       | DNA topoisomerase 2-beta;DNA topoisomerase 2                                      |
| Cluster -1269 | DTYMK       | Thymidylate kinase                                                                |



|               |         |                                                                                                                   |
|---------------|---------|-------------------------------------------------------------------------------------------------------------------|
| Cluster -1269 | TRIM4   | E3 ubiquitin-protein ligase TRIM4                                                                                 |
| Cluster -1269 | BCAP31  | B-cell receptor-associated protein 31                                                                             |
| Cluster -1269 | EFHD1   | EF-hand domain-containing protein D1                                                                              |
| Cluster -1269 | ASPH    | Aspartyl/asparaginyl beta-hydroxylase                                                                             |
| Cluster -1269 | NUP107  | Nuclear pore complex protein Nup107                                                                               |
| Cluster -1269 | COL6A2  | Collagen alpha-2(VI) chain                                                                                        |
| Cluster -1269 | COL6A1  | Collagen alpha-1(VI) chain                                                                                        |
| Cluster -1269 | GOLIM4  | Golgi integral membrane protein 4                                                                                 |
| Cluster -1269 | IDH2    | Isocitrate dehydrogenase [NADP], mitochondrial                                                                    |
| Cluster -1269 | MDH2    | Malate dehydrogenase, mitochondrial;Malate dehydrogenase                                                          |
| Cluster -1213 | HNRNPH2 | Heterogeneous nuclear ribonucleoprotein H2                                                                        |
| Cluster -1213 | NAGLU   | Alpha-N-acetylglucosaminidase;Alpha-N-acetylglucosaminidase 82 kDa form;Alpha-N-acetylglucosaminidase 77 kDa form |
| Cluster -1213 | ATP6V1H | V-type proton ATPase subunit H                                                                                    |
| Cluster -1213 | PAPSS1  | Bifunctional 3-phosphoadenosine 5-phosphosulfate synthase 1;Sulfate adenylyltransferase;Adenylyl-sulfate kinase   |
| Cluster -1213 | THY1    | Thy-1 membrane glycoprotein                                                                                       |
| Cluster -1213 | MAVS    | Mitochondrial antiviral-signaling protein                                                                         |
| Cluster -1213 | DNM2    | Dynamin-2                                                                                                         |
| Cluster -1213 | TNPO3   | Transportin-3                                                                                                     |
| Cluster -1213 | PPM1G   | Protein phosphatase 1G                                                                                            |
| Cluster -1213 | LSS     | Lanosterol synthase                                                                                               |
| Cluster -1213 | SLC30A1 | Zinc transporter 1                                                                                                |
| Cluster -1272 | UQCRI0  | Cytochrome b-c1 complex subunit 9                                                                                 |
| Cluster -1272 | COL12A1 | N/A                                                                                                               |
| Cluster -1272 | DSCR3   | Down syndrome critical region protein 3                                                                           |
| Cluster -1272 | SMC1A   | Structural maintenance of chromosomes protein 1A;Structural maintenance of chromosomes protein                    |
| Cluster -1272 | SLC44A2 | Choline transporter-like protein 2                                                                                |
| Cluster -1272 | SH3BP4  | SH3 domain-binding protein 4                                                                                      |
| Cluster -1272 | PELO    | Protein pelota homolog                                                                                            |
| Cluster -1272 | TTC37   | Tetratricopeptide repeat protein 37                                                                               |
| Cluster -1272 | NSUN2   | tRNA (cytosine(34)-C(5))-methyltransferase                                                                        |
| Cluster -1272 | RAD50   | DNA repair protein RAD50                                                                                          |
| Cluster -1272 | MGAT1   | Alpha-1,3-mannosyl-glycoprotein 2-beta-N-acetylglucosaminyltransferase                                            |
| Cluster -1272 | SNX18   | Sorting nexin-18                                                                                                  |
| Cluster -1272 | TMEM214 | Transmembrane protein 214                                                                                         |
| Cluster -1272 | RPL24   | 60S ribosomal protein L24                                                                                         |
| Cluster -1272 | P4HA1   | Prolyl 4-hydroxylase subunit alpha-1                                                                              |
| Cluster -1272 | SRP72   | Signal recognition particle subunit SRP72                                                                         |

|               |                        |                                                                                                       |
|---------------|------------------------|-------------------------------------------------------------------------------------------------------|
| Cluster -1272 | GOSR2                  | Golgi SNAP receptor complex member 2                                                                  |
| Cluster -1272 | SNX2                   | Sorting nexin-2                                                                                       |
| Cluster -1272 | LARP6                  | La-related protein 6                                                                                  |
| Cluster -1272 | RANBP2                 | E3 SUMO-protein ligase RanBP2                                                                         |
| Cluster -1272 | ENDOD1                 | Endonuclease domain-containing 1 protein                                                              |
| Cluster -1272 | PDCD11                 | Protein RRP5 homolog                                                                                  |
| Cluster -1272 | FLOT2                  | Flotillin-2                                                                                           |
| Cluster -1272 | SERINC1                | Serine incorporator 1                                                                                 |
| Cluster -1272 | SLC27A1                | Long-chain fatty acid transport protein 1                                                             |
| Cluster -1272 | SREBF2                 | Sterol regulatory element-binding protein 2;Processed sterol regulatory element-binding protein 2     |
| Cluster -1272 | PROSC                  | Proline synthase co-transcribed bacterial homolog protein                                             |
| Cluster -1272 | PIGT                   | GPI transamidase component PIG-T                                                                      |
| Cluster -1272 | TMEM33                 | Transmembrane protein 33                                                                              |
| Cluster -1272 | HMGCL                  | Hydroxymethylglutaryl-CoA lyase, mitochondrial                                                        |
| Cluster -1272 | KDELRL1                | ER lumen protein-retaining receptor 1;ER lumen protein-retaining receptor                             |
| Cluster -1272 | SYNJ2BP;SYNJ2 BP-COX16 | Synaptojanin-2-binding protein                                                                        |
| Cluster -1272 | BZW2                   | Basic leucine zipper and W2 domain-containing protein 2                                               |
| Cluster -1272 | CASC4                  | Protein CASC4                                                                                         |
| Cluster -1272 | LRRC41                 | Leucine-rich repeat-containing protein 41                                                             |
| Cluster -1272 | COX7C                  | Cytochrome c oxidase subunit 7C, mitochondrial                                                        |
| Cluster -1272 | SF3A3                  | Splicing factor 3A subunit 3                                                                          |
| Cluster -1272 | C1QBP                  | Complement component 1 Q subcomponent-binding protein, mitochondrial                                  |
| Cluster -1272 | CDH13                  | Cadherin-13                                                                                           |
| Cluster -1272 | MYO1B                  | Unconventional myosin-Ib                                                                              |
| Cluster -1272 | CSK;MATK               | Tyrosine-protein kinase CSK                                                                           |
| Cluster -1272 | SEH1L                  | Nucleoporin SEH1                                                                                      |
| Cluster -1272 | CSDE1                  | Cold shock domain-containing protein E1                                                               |
| Cluster -1272 | LZTFL1                 | Leucine zipper transcription factor-like protein 1                                                    |
| Cluster -1272 | ITGA6                  | Integrin alpha-6;Integrin alpha-6 heavy chain;Integrin alpha-6 light chain;Processed integrin alpha-6 |
| Cluster -1272 | NUP54                  | Nucleoporin p54                                                                                       |
| Cluster -1272 | APPL1                  | DCC-interacting protein 13-alpha                                                                      |
| Cluster -1272 | FCHSD1                 | F-BAR and double SH3 domains protein 1                                                                |
| Cluster -1272 | DOCK7                  | Dedicator of cytokinesis protein 7                                                                    |
| Cluster -1272 | GNA13                  | Guanine nucleotide-binding protein subunit alpha-13                                                   |
| Cluster -1272 | NUP93                  | Nuclear pore complex protein Nup93                                                                    |
| Cluster -1272 | SSRP1                  | FACT complex subunit SSRP1                                                                            |
| Cluster -1272 | VPS37A                 | Vacuolar protein sorting-associated protein 37A                                                       |

|               |                      |                                                                                                              |
|---------------|----------------------|--------------------------------------------------------------------------------------------------------------|
| Cluster -1272 | SLC35E1              | Solute carrier family 35 member E1                                                                           |
| Cluster -1272 | VMP1                 | Vacuole membrane protein 1                                                                                   |
| Cluster -1272 | CLASP2               | CLIP-associating protein 2                                                                                   |
| Cluster -1272 | PIR                  | Pirin                                                                                                        |
| Cluster -1272 | PTPN14               | Tyrosine-protein phosphatase non-receptor type 14                                                            |
| Cluster -1272 | UNC13B               | Protein unc-13 homolog B                                                                                     |
| Cluster -1272 | CCDC93               | Coiled-coil domain-containing protein 93                                                                     |
| Cluster -1272 | BRCC3                | Lys-63-specific deubiquitinase BRCC36                                                                        |
| Cluster -1272 | KIAA0196             | WASH complex subunit strumpellin                                                                             |
| Cluster -1272 | VAC14                | Protein VAC14 homolog                                                                                        |
| Cluster -1272 | MYD88                | Myeloid differentiation primary response protein MyD88                                                       |
| Cluster -1272 | TMCO1                | Transmembrane and coiled-coil domain-containing protein 1                                                    |
| Cluster -1272 | TIMM9                | Mitochondrial import inner membrane translocase subunit Tim9                                                 |
| Cluster -1272 | ERBB2IP              | Protein LAP2                                                                                                 |
| Cluster -1272 | ECHS1                | Enoyl-CoA hydratase, mitochondrial                                                                           |
| Cluster -1272 | 10-set               | Septin-10                                                                                                    |
| Cluster -1272 | NDUFA6               | NADH dehydrogenase [ubiquinone] 1 alpha subcomplex subunit 6                                                 |
| Cluster -1272 | HSPB2;HSPB2-C11orf52 | Heat shock protein beta-2                                                                                    |
| Cluster -1272 | CSPG4                | Chondroitin sulfate proteoglycan 4                                                                           |
| Cluster -1272 | GALNT2               | Polypeptide N-acetylgalactosaminyltransferase 2;Polypeptide N-acetylgalactosaminyltransferase 2 soluble form |
| Cluster -1272 | U2SURP               | U2 snRNP-associated SURP motif-containing protein                                                            |
| Cluster -1272 | PPAP2A               | Lipid phosphate phosphohydrolase 1                                                                           |
| Cluster -1272 | GTF2I                | General transcription factor II-I                                                                            |
| Cluster -1272 | FNDC3A               | Fibronectin type-III domain-containing protein 3A                                                            |
| Cluster -1272 | NAT1                 | Arylamine N-acetyltransferase 1                                                                              |
| Cluster -1272 | RPL14                | 60S ribosomal protein L14                                                                                    |
| Cluster -1272 | ZW10                 | Centromere/kinetochore protein zw10 homolog                                                                  |
| Cluster -1272 | RBPJ                 | Recombining binding protein suppressor of hairless                                                           |
| Cluster -1272 | RPL22L1              | 60S ribosomal protein L22-like 1                                                                             |
| Cluster -1272 | TBC1D4               | TBC1 domain family member 4                                                                                  |
| Cluster -1272 | CRTAP                | Cartilage-associated protein                                                                                 |
| Cluster -1272 | DNAH1                | Dynein heavy chain 1, axonemal                                                                               |
| Cluster -1272 | TMEM173              | Stimulator of interferon genes protein                                                                       |
| Cluster -1272 | SUPT6H               | Transcription elongation factor SPT6                                                                         |
| Cluster -1272 | NDUFB10              | NADH dehydrogenase [ubiquinone] 1 beta subcomplex subunit 10                                                 |
| Cluster -1272 | VKORC1L1             | Vitamin K epoxide reductase complex subunit 1-like protein 1                                                 |
| Cluster -1272 | NDUFS4               | NADH dehydrogenase [ubiquinone] iron-sulfur protein 4,                                                       |

|               |                      |                                                                                                  |
|---------------|----------------------|--------------------------------------------------------------------------------------------------|
|               |                      | mitochondrial                                                                                    |
| Cluster -1272 | SLC25A13             | Calcium-binding mitochondrial carrier protein Aralar2                                            |
| Cluster -1272 | TBRG4                | Protein TBRG4                                                                                    |
| Cluster -1272 | ACADSB               | Short/branched chain specific acyl-CoA dehydrogenase, mitochondrial                              |
| Cluster -1272 | CD47                 | Leukocyte surface antigen CD47                                                                   |
| Cluster -1272 | SUCLA2               | Succinyl-CoA ligase [ADP-forming] subunit beta, mitochondrial                                    |
| Cluster -1272 | SDF2L1               | Stromal cell-derived factor 2-like protein 1                                                     |
| Cluster -1272 | ME2                  | NAD-dependent malic enzyme, mitochondrial                                                        |
| Cluster -1272 | FKBP15               | FK506-binding protein 15                                                                         |
| Cluster -1272 | TMX4                 | Thioredoxin-related transmembrane protein 4                                                      |
| Cluster -1272 | HKDC1                | Putative hexokinase HKDC1                                                                        |
| Cluster -1272 | SRSF11               | Serine/arginine-rich splicing factor 11                                                          |
| Cluster -1272 | AK4                  | Adenylate kinase 4, mitochondrial                                                                |
| Cluster -1272 | FHAD1                | Forkhead-associated domain-containing protein 1                                                  |
| Cluster -1272 | BCKDHA               | 2-oxoisovalerate dehydrogenase subunit alpha, mitochondrial                                      |
| Cluster -1272 | CHID1                | Chitinase domain-containing protein 1                                                            |
| Cluster -1272 | LEPREL2              | Prolyl 3-hydroxylase 3                                                                           |
| Cluster -1272 | C6orf163             | Uncharacterized protein C6orf163                                                                 |
| Cluster -1272 | CCDC37               | Coiled-coil domain-containing protein 37                                                         |
| Cluster -1272 | CYP51A1              | Lanosterol 14-alpha demethylase                                                                  |
| Cluster -1272 | WNT5A                | Protein Wnt-5a;Protein Wnt                                                                       |
| Cluster -1272 | PIGS                 | GPI transamidase component PIG-S                                                                 |
| Cluster -1272 | MRPL50               | 39S ribosomal protein L50, mitochondrial                                                         |
| Cluster -1272 | ETFDH                | Electron transfer flavoprotein-ubiquinone oxidoreductase, mitochondrial                          |
| Cluster -1272 | NUDT19               | Nucleoside diphosphate-linked moiety X motif 19, mitochondrial                                   |
| Cluster -1272 | MRPL4                | 39S ribosomal protein L4, mitochondrial                                                          |
| Cluster -1272 | RAB23                | Ras-related protein Rab-23                                                                       |
| Cluster -1272 | LLGL1                | Lethal(2) giant larvae protein homolog 1                                                         |
| Cluster -1272 | RECK                 | Reversion-inducing cysteine-rich protein with Kazal motifs                                       |
| Cluster -1272 | SETBP1               | SET-binding protein                                                                              |
| Cluster -1272 | CEP350               | Centrosome-associated protein 350                                                                |
| Cluster -1272 | DAG1                 | Dystroglycan;Alpha-dystroglycan;Beta-dystroglycan                                                |
| Cluster -1272 | CYP7B1               | 25-hydroxycholesterol 7-alpha-hydroxylase                                                        |
| Cluster -1272 | ZNF207               | BUB3-interacting and GLEBS motif-containing protein ZNF207                                       |
| Cluster -1272 | RPL10                | N/A                                                                                              |
| Cluster -1272 | SNX25                | Sorting nexin-25                                                                                 |
| Cluster -1272 | DDX11;DDX11L8;DDX12P | Probable ATP-dependent RNA helicase DDX11;Putative ATP-dependent RNA helicase DDX11-like protein |

|               |                    |                                                                                                                                                         |
|---------------|--------------------|---------------------------------------------------------------------------------------------------------------------------------------------------------|
|               |                    | 8;Putative ATP-dependent RNA helicase DDX12                                                                                                             |
| Cluster -1272 | NOC3L              | Nucleolar complex protein 3 homolog                                                                                                                     |
| Cluster -1272 | XXYLT1             | Xyloside xylosyltransferase 1                                                                                                                           |
| Cluster -1272 | B3GALTL            | Beta-1,3-glucosyltransferase                                                                                                                            |
| Cluster -1272 | DRG2               | Developmentally-regulated GTP-binding protein 2                                                                                                         |
| Cluster -1272 | SLIRP              | SRA stem-loop-interacting RNA-binding protein, mitochondrial                                                                                            |
| Cluster -1272 | ACOT8              | Acyl-coenzyme A thioesterase 8                                                                                                                          |
| Cluster -1272 | ENPP1              | Ectonucleotide pyrophosphatase/phosphodiesterase family member 1;Alkaline phosphodiesterase I;Nucleotide pyrophosphatase                                |
| Cluster -1272 | LEPREL4;P3H4       | Synaptonemal complex protein SC65                                                                                                                       |
| Cluster -1272 | PYCR2              | Pyrroline-5-carboxylate reductase 2;Pyrroline-5-carboxylate reductase                                                                                   |
| Cluster -1272 | ACOX2              | Peroxisomal acyl-coenzyme A oxidase 2;Acyl-coenzyme A oxidase                                                                                           |
| Cluster -1272 | HINT2              | Histidine triad nucleotide-binding protein 2, mitochondrial                                                                                             |
| Cluster -1272 | TACO1              | Translational activator of cytochrome c oxidase 1                                                                                                       |
| Cluster -1272 | CNTRL              | Centriolin                                                                                                                                              |
| Cluster -1272 | FSIP2              | Fibrous sheath-interacting protein 2                                                                                                                    |
| Cluster -1272 | UQCRFS1;UQC RFS1P1 | Cytochrome b-c1 complex subunit Rieske, mitochondrial;Cytochrome b-c1 complex subunit 11;Putative cytochrome b-c1 complex subunit Rieske-like protein 1 |
| Cluster -1272 | CLPX               | ATP-dependent Clp protease ATP-binding subunit clpX-like, mitochondrial                                                                                 |
| Cluster -1272 | MPHOSPH8           | N/A                                                                                                                                                     |
| Cluster -1272 | MRPL2              | 39S ribosomal protein L2, mitochondrial                                                                                                                 |
| Cluster -1272 | CYP20A1            | Cytochrome P450 20A1                                                                                                                                    |
| Cluster -1272 | OR2Z1              | Olfactory receptor 2Z1                                                                                                                                  |
| Cluster -1272 | LEMD2              | LEM domain-containing protein 2                                                                                                                         |
| Cluster -1272 | SNX8               | Sorting nexin-8                                                                                                                                         |
| Cluster -1272 | GNL1               | Guanine nucleotide-binding protein-like 1                                                                                                               |
| Cluster -1272 | CPNE3              | Copine-3                                                                                                                                                |
| Cluster -1272 | CTTNBP2NL          | CTTNBP2 N-terminal-like protein                                                                                                                         |
| Cluster -1272 | ECH1               | Delta(3,5)-Delta(2,4)-dienoyl-CoA isomerase, mitochondrial                                                                                              |
| Cluster -1272 | MRS2               | Magnesium transporter MRS2 homolog, mitochondrial                                                                                                       |
| Cluster -1272 | NPM3               | Nucleoplasmin-3                                                                                                                                         |
| Cluster -1272 | HSPA5              | 78 kDa glucose-regulated protein                                                                                                                        |
| Cluster -1272 | CPT2               | Carnitine O-palmitoyltransferase 2, mitochondrial                                                                                                       |
| Cluster -1272 | UQCRQ              | Cytochrome b-c1 complex subunit 8                                                                                                                       |
| Cluster -1272 | NFS1               | Cysteine desulfurase, mitochondrial                                                                                                                     |
| Cluster -1272 | PDP1               | [Pyruvate dehydrogenase [acetyl-transferring]]-phosphatase 1, mitochondrial                                                                             |

|               |          |                                                                                           |
|---------------|----------|-------------------------------------------------------------------------------------------|
| Cluster -1272 | MRPS31   | 28S ribosomal protein S31, mitochondrial                                                  |
| Cluster -1272 | MRPS9    | 28S ribosomal protein S9, mitochondrial                                                   |
| Cluster -1272 | IDH3A    | Isocitrate dehydrogenase [NAD] subunit alpha, mitochondrial                               |
| Cluster -1272 | IVD      | Isovaleryl-CoA dehydrogenase, mitochondrial                                               |
| Cluster -1272 | BCS1L    | Mitochondrial chaperone BCS1                                                              |
| Cluster -1272 | PTGES2   | Prostaglandin E synthase 2;Prostaglandin E synthase 2 truncated form                      |
| Cluster -1272 | HEATR1   | HEAT repeat-containing protein 1;HEAT repeat-containing protein 1, N-terminally processed |
| Cluster -1272 | CLPB     | N/A                                                                                       |
| Cluster -1272 | DAPK3    | Death-associated protein kinase 3                                                         |
| Cluster -1272 | SDHA     | Succinate dehydrogenase [ubiquinone] flavoprotein subunit, mitochondrial                  |
| Cluster -1272 | ECI1;DCI | Enoyl-CoA delta isomerase 1, mitochondrial                                                |
| Cluster -1272 | ATP5D    | ATP synthase subunit delta, mitochondrial                                                 |
| Cluster -1272 | FAM8A1   | Protein FAM8A1                                                                            |
| Cluster -1272 | RBM14    | RNA-binding protein 14                                                                    |
| Cluster -1272 | MMP14    | Matrix metalloproteinase-14                                                               |
| Cluster -1272 | HLA-C    | HLA class I histocompatibility antigen, Cw-7 alpha chain                                  |
| Cluster -1272 | MAP2K3   | Dual specificity mitogen-activated protein kinase kinase 3                                |
| Cluster -1272 | IMPDH2   | Inosine-5-monophosphate dehydrogenase 2                                                   |
| Cluster -1272 | GPR107   | Protein GPR107                                                                            |
| Cluster -1272 | FAM162A  | Protein FAM162A                                                                           |
| Cluster -1272 | PPP6R3   | Serine/threonine-protein phosphatase 6 regulatory subunit 3                               |
| Cluster -1272 | NUP155   | Nuclear pore complex protein Nup155                                                       |
| Cluster -1272 | ARHGAP20 | Rho GTPase-activating protein 20                                                          |
| Cluster -1272 | RNF213   | E3 ubiquitin-protein ligase RNF213                                                        |
| Cluster -1272 | NADSYN1  | Glutamine-dependent NAD(+) synthetase                                                     |
| Cluster -1272 | POFUT2   | GDP-fucose protein O-fucosyltransferase 2                                                 |
| Cluster -1272 | EMC7     | ER membrane protein complex subunit 7                                                     |
| Cluster -1272 | TMEM165  | Transmembrane protein 165                                                                 |
| Cluster -1272 | PRPF38A  | Pre-mRNA-splicing factor 38A                                                              |
| Cluster -1272 | TFRC     | Transferrin receptor protein 1;Transferrin receptor protein 1, serum form                 |
| Cluster -1272 | ADAM10   | Disintegrin and metalloproteinase domain-containing protein 10                            |
| Cluster -1272 | HSD17B11 | Estradiol 17-beta-dehydrogenase 11                                                        |
| Cluster -1272 | SCFD2    | Sec1 family domain-containing protein 2                                                   |
| Cluster -1272 | AP1S1    | AP-1 complex subunit sigma-1A                                                             |
| Cluster -1272 | SP100    | Nuclear autoantigen Sp-100                                                                |
| Cluster -1272 | MRPL42   | 39S ribosomal protein L42, mitochondrial                                                  |
| Cluster -1272 | FKBP11   | Peptidyl-prolyl cis-trans isomerase FKBP11;Peptidyl-prolyl cis-trans isomerase            |

|               |          |                                                                            |
|---------------|----------|----------------------------------------------------------------------------|
| Cluster -1272 | ERAP1    | Endoplasmic reticulum aminopeptidase 1                                     |
| Cluster -1272 | SOS1     | Son of sevenless homolog 1                                                 |
| Cluster -1272 | ARHGAP29 | Rho GTPase-activating protein 29                                           |
| Cluster -1272 | ATR      | Serine/threonine-protein kinase ATR                                        |
| Cluster -1272 | TRIP10   | Cdc42-interacting protein 4                                                |
| Cluster -1272 | NUP88    | Nuclear pore complex protein Nup88                                         |
| Cluster -1272 | C11orf73 | Protein Hikeshi                                                            |
| Cluster -1272 | ACSL1    | Long-chain-fatty-acid--CoA ligase 1                                        |
| Cluster -1272 | ATP13A3  | Probable cation-transporting ATPase 13A3                                   |
| Cluster -1272 | PIP5K2   | Inositol hexakisphosphate and diphosphoinositol-pentakisphosphate kinase 2 |

Table S2: Clusters of differentially expressed proteins (patient-derived cells)

| Cluster       | Gene.names        | Protein.names                                                                                                                                                 |
|---------------|-------------------|---------------------------------------------------------------------------------------------------------------------------------------------------------------|
| Cluster -1198 | CHMP4B            | Charged multivesicular body protein 4b                                                                                                                        |
| Cluster -1198 | SERBP1            | Plasminogen activator inhibitor 1 RNA-binding protein                                                                                                         |
| Cluster -1198 | ASL               | Argininosuccinate lyase                                                                                                                                       |
| Cluster -1198 | TP53BP1           | Tumor suppressor p53-binding protein 1                                                                                                                        |
| Cluster -1198 | METAP2            | Methionine aminopeptidase 2                                                                                                                                   |
| Cluster -1198 | DBNL              | Drebrin-like protein                                                                                                                                          |
| Cluster -1198 | CLTB              | Clathrin light chain B                                                                                                                                        |
| Cluster -1198 | SRSF3             | Serine/arginine-rich splicing factor 3                                                                                                                        |
| Cluster -1198 | SRSF1             | Serine/arginine-rich splicing factor 1                                                                                                                        |
| Cluster -1198 | YBX3              | Y-box-binding protein 3                                                                                                                                       |
| Cluster -1198 | WDR77             | Methylosome protein 50                                                                                                                                        |
| Cluster -1198 | CTBP1             | C-terminal-binding protein 1                                                                                                                                  |
| Cluster -1198 | HNRNPD            | Heterogeneous nuclear ribonucleoprotein D0                                                                                                                    |
| Cluster -1198 | EIF4G1            | Eukaryotic translation initiation factor 4 gamma 1                                                                                                            |
| Cluster -1198 | HEBP1             | Heme-binding protein 1                                                                                                                                        |
| Cluster -1198 | GUK1              | Guanylate kinase                                                                                                                                              |
| Cluster -1198 | ARPC1A            | Actin-related protein 2/3 complex subunit 1A                                                                                                                  |
| Cluster -1198 | CEP170            | Centrosomal protein of 170 kDa                                                                                                                                |
| Cluster -1198 | BPNT1             | 3(2),5-bisphosphate nucleotidase 1                                                                                                                            |
| Cluster -1198 | USP9X             | Probable ubiquitin carboxyl-terminal hydrolase FAF-X                                                                                                          |
| Cluster -1198 | LAMTOR1           | Ragulator complex protein LAMTOR1                                                                                                                             |
| Cluster -1198 | EIF4A2            | Eukaryotic initiation factor 4A-II;Eukaryotic initiation factor 4A-II, N-terminally processed                                                                 |
| Cluster -1198 | DYNC1I2           | Cytoplasmic dynein 1 intermediate chain 2                                                                                                                     |
| Cluster -1198 | EIF2S3;EIF2S3L    | Eukaryotic translation initiation factor 2 subunit 3;Putative eukaryotic translation initiation factor 2 subunit 3-like protein                               |
| Cluster -1198 | ESD               | S-formylglutathione hydrolase                                                                                                                                 |
| Cluster -1198 | CTSD              | Cathepsin D;Cathepsin D light chain;Cathepsin D heavy chain                                                                                                   |
| Cluster -1198 | TOM1              | Target of Myb protein 1                                                                                                                                       |
| Cluster -1198 | ACTR3             | Actin-related protein 3                                                                                                                                       |
| Cluster -1198 | SRSF7             | Serine/arginine-rich splicing factor 7                                                                                                                        |
| Cluster -1198 | GSTM3             | Glutathione S-transferase Mu 3                                                                                                                                |
| Cluster -1198 | SERBP1            | Plasminogen activator inhibitor 1 RNA-binding protein                                                                                                         |
| Cluster -1198 | STIP1             | Stress-induced-phosphoprotein 1                                                                                                                               |
| Cluster -1198 | PTBP1             | Polypyrimidine tract-binding protein 1                                                                                                                        |
| Cluster -1198 | HNRNPA1;HNRNPA1L2 | Heterogeneous nuclear ribonucleoprotein A1;Heterogeneous nuclear ribonucleoprotein A1, N-terminally processed;Heterogeneous nuclear ribonucleoprotein A1-like |



|               |                  |                                                                                                                                                                                                                                 |
|---------------|------------------|---------------------------------------------------------------------------------------------------------------------------------------------------------------------------------------------------------------------------------|
|               |                  | 2                                                                                                                                                                                                                               |
| Cluster -1198 | RAB23            | Ras-related protein Rab-23                                                                                                                                                                                                      |
| Cluster -1198 | ILF3             | Interleukin enhancer-binding factor 3                                                                                                                                                                                           |
| Cluster -1198 | HNRNPA2B1        | Heterogeneous nuclear ribonucleoproteins A2/B1                                                                                                                                                                                  |
| Cluster -1198 | RBMX;RBMXL1      | RNA-binding motif protein, X chromosome;RNA-binding motif protein, X chromosome, N-terminally processed;RNA binding motif protein, X-linked-like-1                                                                              |
| Cluster -1198 | MTHFD1           | C-1-tetrahydrofolate synthase, cytoplasmic;Methylenetetrahydrofolate dehydrogenase;Methenyltetrahydrofolate cyclohydrolase;Formyltetrahydrofolate synthetase;C-1-tetrahydrofolate synthase, cytoplasmic, N-terminally processed |
| Cluster -1198 | PFN2             | Profilin-2;Profilin                                                                                                                                                                                                             |
| Cluster -1198 | BLVRA            | Biliverdin reductase A                                                                                                                                                                                                          |
| Cluster -1198 | AK1              | Adenylate kinase isoenzyme 1                                                                                                                                                                                                    |
| Cluster -1198 | SNX12            | Sorting nexin-12                                                                                                                                                                                                                |
| Cluster -1198 | KPNA4            | Importin subunit alpha-3                                                                                                                                                                                                        |
| Cluster -1198 | SGTA             | Small glutamine-rich tetratricopeptide repeat-containing protein alpha                                                                                                                                                          |
| Cluster -1198 | PTGR1            | Prostaglandin reductase 1                                                                                                                                                                                                       |
| Cluster -1198 | SOS1             | Son of sevenless homolog 1                                                                                                                                                                                                      |
| Cluster -1198 | HSP90AB2P        | Putative heat shock protein HSP 90-beta 2                                                                                                                                                                                       |
| Cluster -1198 | HINT1            | Histidine triad nucleotide-binding protein 1                                                                                                                                                                                    |
| Cluster -1198 | PPP3R1           | Calcineurin subunit B type 1                                                                                                                                                                                                    |
| Cluster -1198 | IPO5             | Importin-5                                                                                                                                                                                                                      |
| Cluster -1198 | EIF3A            | Eukaryotic translation initiation factor 3 subunit A                                                                                                                                                                            |
| Cluster -1198 | MAPK1            | Mitogen-activated protein kinase 1                                                                                                                                                                                              |
| Cluster -1198 | BID              | BH3-interacting domain death agonist;BH3-interacting domain death agonist p15;BH3-interacting domain death agonist p13;BH3-interacting domain death agonist p11                                                                 |
| Cluster -1198 | LGMN             | Legumain                                                                                                                                                                                                                        |
| Cluster -1198 | LPP              | Lipoma-preferred partner                                                                                                                                                                                                        |
| Cluster -1198 | LRRC47           | Leucine-rich repeat-containing protein 47                                                                                                                                                                                       |
| Cluster -1198 | NEDD8;NEDD8-MDP1 | NEDD8                                                                                                                                                                                                                           |
| Cluster -1198 | RAB35            | Ras-related protein Rab-35                                                                                                                                                                                                      |
| Cluster -1198 | ARCN1            | Coatomer subunit delta                                                                                                                                                                                                          |
| Cluster -1198 | PDLIM4           | PDZ and LIM domain protein 4                                                                                                                                                                                                    |
| Cluster -1198 | PRDX1            | Peroxiredoxin-1                                                                                                                                                                                                                 |
| Cluster -1198 | PGAM1            | Phosphoglycerate mutase 1                                                                                                                                                                                                       |
| Cluster -1198 | PCMT1            | Protein-L-isoaspartate(D-aspartate) O-methyltransferase;Protein-L-isoaspartate O-methyltransferase                                                                                                                              |
| Cluster -1198 | GSTM2            | Glutathione S-transferase Mu 2                                                                                                                                                                                                  |

|               |                |                                                                                                                                  |
|---------------|----------------|----------------------------------------------------------------------------------------------------------------------------------|
| Cluster -1198 | UBA2           | SUMO-activating enzyme subunit 2                                                                                                 |
| Cluster -1198 | ASMTL          | N-acetylserotonin O-methyltransferase-like protein                                                                               |
| Cluster -1198 | GLRX           | Glutaredoxin-1                                                                                                                   |
| Cluster -1198 | TNKS1BP1       | 182 kDa tankyrase-1-binding protein                                                                                              |
| Cluster -1198 | G3BP1          | Ras GTPase-activating protein-binding protein 1                                                                                  |
| Cluster -1198 | CASK           | Peripheral plasma membrane protein CASK                                                                                          |
| Cluster -1198 | PTPN11         | Tyrosine-protein phosphatase non-receptor type 11                                                                                |
| Cluster -1198 | CTTN           | Src substrate cortactin                                                                                                          |
| Cluster -1198 | RAC1;RAC2;RAC3 | Ras-related C3 botulinum toxin substrate 1;Ras-related C3 botulinum toxin substrate 2;Ras-related C3 botulinum toxin substrate 3 |
| Cluster -1198 | EIF5B          | Eukaryotic translation initiation factor 5B                                                                                      |
| Cluster -1198 | ARPP19         | cAMP-regulated phosphoprotein 19                                                                                                 |
| Cluster -1198 | ASS1           | Argininosuccinate synthase                                                                                                       |
| Cluster -1198 | ACPI           | Low molecular weight phosphotyrosine protein phosphatase                                                                         |
| Cluster -1198 | LPXN           | Leupaxin                                                                                                                         |
| Cluster -1198 | COPZ2          | Coatamer subunit zeta-2                                                                                                          |
| Cluster -1198 | LMCD1          | LIM and cysteine-rich domains protein 1                                                                                          |
| Cluster -1198 | OSTF1          | Osteoclast-stimulating factor 1                                                                                                  |
| Cluster -1198 | RPL8           | 60S ribosomal protein L8                                                                                                         |
| Cluster -1198 | EEF1D          | Elongation factor 1-delta                                                                                                        |
| Cluster -1198 | CSTB           | Cystatin-B                                                                                                                       |
| Cluster -1198 | LAP3           | Cytosol aminopeptidase                                                                                                           |
| Cluster -1198 | RPS27          | 40S ribosomal protein S27                                                                                                        |
| Cluster -1198 | KARS           | Lysine--tRNA ligase                                                                                                              |
| Cluster -1198 | PPM1A          | Protein phosphatase 1A                                                                                                           |
| Cluster -1198 | PDCD10         | Programmed cell death protein 10                                                                                                 |
| Cluster -1198 | PLAA           | Phospholipase A-2-activating protein                                                                                             |
| Cluster -1198 | DCTN3          | Dynactin subunit 3                                                                                                               |
| Cluster -1198 | STRN           | Striatin                                                                                                                         |
| Cluster -1198 | BST1           | ADP-ribosyl cyclase/cyclic ADP-ribose hydrolase 2                                                                                |
| Cluster -1198 | YKT6           | Synaptobrevin homolog YKT6                                                                                                       |
| Cluster -1198 | PPIL1          | Peptidyl-prolyl cis-trans isomerase-like 1                                                                                       |
| Cluster -1198 | OSBPL3         | Oxysterol-binding protein-related protein 3                                                                                      |
| Cluster -1198 | BCL2L13        | Bcl-2-like protein 13                                                                                                            |
| Cluster -1198 | HERC4          | Probable E3 ubiquitin-protein ligase HERC4                                                                                       |
| Cluster -1198 | TPM4           | Tropomyosin alpha-4 chain                                                                                                        |
| Cluster -1198 | 08-set         | Septin-8                                                                                                                         |
| Cluster -1198 | AIMP1          | Aminoacyl tRNA synthase complex-interacting multifunctional protein 1;Endothelial monocyte-activating polypeptide 2              |
| Cluster -1198 | CLINT1         | Clathrin interactor 1                                                                                                            |

|               |                   |                                                                                                                                         |
|---------------|-------------------|-----------------------------------------------------------------------------------------------------------------------------------------|
| Cluster -1198 | CNN1              | Calponin-1;Calponin                                                                                                                     |
| Cluster -1198 | BLVRB             | Flavin reductase (NADPH)                                                                                                                |
| Cluster -1198 | USP5              | Ubiquitin carboxyl-terminal hydrolase 5                                                                                                 |
| Cluster -1198 | DPYSL3            | Dihydropyrimidinase-related protein 3                                                                                                   |
| Cluster -1198 | ARPC5L            | Actin-related protein 2/3 complex subunit 5-like protein                                                                                |
| Cluster -1198 | RABGAP1           | Rab GTPase-activating protein 1                                                                                                         |
| Cluster -1198 | LUC7L2            | Putative RNA-binding protein Luc7-like 2                                                                                                |
| Cluster -1198 | RBM3              | RNA-binding protein 3                                                                                                                   |
| Cluster -1198 | BTF3              | Transcription factor BTF3                                                                                                               |
| Cluster -1198 | CTSL              | Cathepsin L1;Cathepsin L1 heavy chain;Cathepsin L1 light chain                                                                          |
| Cluster -1198 | NCL               | Nucleolin                                                                                                                               |
| Cluster -1198 | PEA15             | Astrocytic phosphoprotein PEA-15                                                                                                        |
| Cluster -1198 | PPIA              | Peptidyl-prolyl cis-trans isomerase A;Peptidyl-prolyl cis-trans isomerase A, N-terminally processed;Peptidyl-prolyl cis-trans isomerase |
| Cluster -1198 | YWHAE             | 14-3-3 protein epsilon                                                                                                                  |
| Cluster -1198 | NME1              | Nucleoside diphosphate kinase A                                                                                                         |
| Cluster -1198 | AHCY              | Adenosylhomocysteinase                                                                                                                  |
| Cluster -1198 | PLS3              | Plastin-3                                                                                                                               |
| Cluster -1198 | ACTN1             | Alpha-actinin-1                                                                                                                         |
| Cluster -1198 | ALDOA             | Fructose-bisphosphate aldolase A;Fructose-bisphosphate aldolase                                                                         |
| Cluster -1198 | LDHA              | L-lactate dehydrogenase A chain                                                                                                         |
| Cluster -1198 | ACTN4             | Alpha-actinin-4                                                                                                                         |
| Cluster -1198 | LSM1              | U6 snRNA-associated Sm-like protein LSM1                                                                                                |
| Cluster -1198 | UGP2              | UTP--glucose-1-phosphate uridylyltransferase                                                                                            |
| Cluster -1198 | GPI               | Glucose-6-phosphate isomerase                                                                                                           |
| Cluster -1198 | VAPB              | Vesicle-associated membrane protein-associated protein B/C                                                                              |
| Cluster -1198 | TIAL1;TIA1        | Nucleolysin TIAR                                                                                                                        |
| Cluster -1198 | PSMB5             | Proteasome subunit beta type-5                                                                                                          |
| Cluster -1198 | KDSR              | 3-ketodihydrosphingosine reductase                                                                                                      |
| Cluster -1198 | PXN               | Paxillin                                                                                                                                |
| Cluster -1198 | ARPC4;ARPC4-TTLL3 | Actin-related protein 2/3 complex subunit 4                                                                                             |
| Cluster -1198 | BOLA2             | BolA-like protein 2                                                                                                                     |
| Cluster -1198 | ARPC2             | Actin-related protein 2/3 complex subunit 2                                                                                             |
| Cluster -1198 | FHL1              | Four and a half LIM domains protein 1                                                                                                   |
| Cluster -1198 | CCDC74A;CCDC74B   | Coiled-coil domain-containing protein 74A;Coiled-coil domain-containing protein 74B                                                     |
| Cluster -1198 | PNP               | Purine nucleoside phosphorylase                                                                                                         |
| Cluster -1198 | AKAP12            | A-kinase anchor protein 12                                                                                                              |
| Cluster -1198 | RILPL1            | RILP-like protein 1                                                                                                                     |

|               |                     |                                                                                                                               |
|---------------|---------------------|-------------------------------------------------------------------------------------------------------------------------------|
| Cluster -1198 | RNPEP               | Aminopeptidase B                                                                                                              |
| Cluster -1198 | CENPE               | Centromere-associated protein E;Kinesin-like protein                                                                          |
| Cluster -1198 | DSTN                | Destrin                                                                                                                       |
| Cluster -1198 | ZNF207              | BUB3-interacting and GLEBS motif-containing protein ZNF207                                                                    |
| Cluster -1198 | HN1                 | Hematological and neurological expressed 1 protein;Hematological and neurological expressed 1 protein, N-terminally processed |
| Cluster -1198 | UBLCP1              | Ubiquitin-like domain-containing CTD phosphatase 1                                                                            |
| Cluster -1198 | SYNPO2              | Synaptopodin-2                                                                                                                |
| Cluster -1198 | ZYX                 | Zyxin                                                                                                                         |
| Cluster -1198 | CRKL                | Crk-like protein                                                                                                              |
| Cluster -1198 | FAM195B             | Protein FAM195B                                                                                                               |
| Cluster -1198 | TAGLN               | Transgelin                                                                                                                    |
| Cluster -1198 | 07-set              | Septin-7                                                                                                                      |
| Cluster -1198 | CALD1               | Caldesmon                                                                                                                     |
| Cluster -1198 | ATAD1               | ATPase family AAA domain-containing protein 1                                                                                 |
| Cluster -1198 | SEPT11;SEPT6        | Septin-11;Septin-6                                                                                                            |
| Cluster -1198 | CTNNA1              | Catenin alpha-1                                                                                                               |
| Cluster -1198 | MAP2K2              | Dual specificity mitogen-activated protein kinase kinase 2                                                                    |
| Cluster -1198 | 02-set              | Septin-2                                                                                                                      |
| Cluster -1198 | CAPZA1              | F-actin-capping protein subunit alpha-1                                                                                       |
| Cluster -1198 | UBA1                | Ubiquitin-like modifier-activating enzyme 1                                                                                   |
| Cluster -1198 | HSP90AA1            | Heat shock protein HSP 90-alpha                                                                                               |
| Cluster -1198 | PKM                 | Pyruvate kinase PKM;Pyruvate kinase                                                                                           |
| Cluster -1198 | CLIC4               | Chloride intracellular channel protein 4                                                                                      |
| Cluster -1198 | TLN1                | Talin-1                                                                                                                       |
| Cluster -1198 | STRAP               | Serine-threonine kinase receptor-associated protein                                                                           |
| Cluster -1198 | FERMT2              | Fermitin family homolog 2                                                                                                     |
| Cluster -1198 | CCT3                | T-complex protein 1 subunit gamma                                                                                             |
| Cluster -1198 | CBR1                | Carbonyl reductase [NADPH] 1                                                                                                  |
| Cluster -1198 | MAP1B               | Microtubule-associated protein 1B;MAP1B heavy chain;MAP1 light chain LC1                                                      |
| Cluster -1198 | AKAP2               | A-kinase anchor protein 2                                                                                                     |
| Cluster -1198 | HSPB7;DKFZp779D0968 | Heat shock protein beta-7                                                                                                     |
| Cluster -1198 | PLEC                | Plectin                                                                                                                       |
| Cluster -1198 | AHNAK               | Neuroblast differentiation-associated protein AHNAK                                                                           |
| Cluster -1198 | CAPZA2              | F-actin-capping protein subunit alpha-2                                                                                       |
| Cluster -1198 | HSPA8               | Heat shock cognate 71 kDa protein                                                                                             |
| Cluster -1198 | VIM                 | Vimentin                                                                                                                      |
| Cluster -1198 | CAPN1               | Calpain-1 catalytic subunit                                                                                                   |

|               |                                              |                                                                                                                                 |
|---------------|----------------------------------------------|---------------------------------------------------------------------------------------------------------------------------------|
| Cluster -1198 | RAB11FIP5                                    | Rab11 family-interacting protein 5                                                                                              |
| Cluster -1198 | PGK1                                         | Phosphoglycerate kinase 1                                                                                                       |
| Cluster -1198 | CNN2                                         | Calponin-2;Calponin                                                                                                             |
| Cluster -1198 | SYNC                                         | Syncoilin                                                                                                                       |
| Cluster -1198 | APEH                                         | Acylamino-acid-releasing enzyme                                                                                                 |
| Cluster -1198 | SAP18                                        | Histone deacetylase complex subunit SAP18                                                                                       |
| Cluster -1198 | TAB1                                         | TGF-beta-activated kinase 1 and MAP3K7-binding protein 1                                                                        |
| Cluster -1198 | CBFB                                         | Core-binding factor subunit beta                                                                                                |
| Cluster -1198 | ATP5H                                        | ATP synthase subunit d, mitochondrial                                                                                           |
| Cluster -1198 | ELAVL1                                       | ELAV-like protein 1                                                                                                             |
| Cluster -1198 | ERH                                          | Enhancer of rudimentary homolog                                                                                                 |
| Cluster -1198 | RPLP2                                        | 60S acidic ribosomal protein P2                                                                                                 |
| Cluster -1198 | HIST1H1E;HIST1H1C;HIST1H1D;HIST1H1A;HIST1H1T | Histone H1.4;Histone H1.2;Histone H1.3;Histone H1.1;Histone H1t                                                                 |
| Cluster -1198 | PCBP1                                        | Poly(rC)-binding protein 1                                                                                                      |
| Cluster -1198 | GTF3C3                                       | General transcription factor 3C polypeptide 3                                                                                   |
| Cluster -1198 | CUTA                                         | Protein CutA                                                                                                                    |
| Cluster -1198 | PGM2                                         | Phosphoglucomutase-2                                                                                                            |
| Cluster -1198 | AHNAK2                                       | Protein AHNAK2                                                                                                                  |
| Cluster -1198 | ACTBL2                                       | Beta-actin-like protein 2                                                                                                       |
| Cluster -1198 | FHL2                                         | Four and a half LIM domains protein 2                                                                                           |
| Cluster -1198 | PTP4A2;PTP4A1                                | Protein tyrosine phosphatase type IVA 2;Protein tyrosine phosphatase type IVA 1                                                 |
| Cluster -1198 | NHP2L1                                       | NHP2-like protein 1;NHP2-like protein 1, N-terminally processed                                                                 |
| Cluster -1198 | IRF2BP2                                      | Interferon regulatory factor 2-binding protein 2                                                                                |
| Cluster -1198 | ABRACL                                       | Costars family protein ABRACL                                                                                                   |
| Cluster -1198 | SERPINB1                                     | Leukocyte elastase inhibitor                                                                                                    |
| Cluster -1198 | SNRPA                                        | U1 small nuclear ribonucleoprotein A                                                                                            |
| Cluster -1198 | NACA                                         | Nascent polypeptide-associated complex subunit alpha, muscle-specific form;Nascent polypeptide-associated complex subunit alpha |
| Cluster -1198 | API5                                         | Apoptosis inhibitor 5                                                                                                           |
| Cluster -1198 | L3HYPDH                                      | Trans-3-hydroxy-L-proline dehydratase                                                                                           |
| Cluster -1198 | ANP32A                                       | Acidic leucine-rich nuclear phosphoprotein 32 family member A                                                                   |
| Cluster -1198 | MARCKS                                       | Myristoylated alanine-rich C-kinase substrate                                                                                   |
| Cluster -1198 | NUDT5                                        | ADP-sugar pyrophosphatase                                                                                                       |
| Cluster -1198 | SYNCRIP                                      | Heterogeneous nuclear ribonucleoprotein Q                                                                                       |
| Cluster -1198 | BRK1                                         | Protein BRICK1                                                                                                                  |
| Cluster -1198 | RCC1                                         | Regulator of chromosome condensation                                                                                            |

|               |                        |                                                                                                                                |
|---------------|------------------------|--------------------------------------------------------------------------------------------------------------------------------|
| Cluster -1198 | YBX1                   | Nuclease-sensitive element-binding protein 1                                                                                   |
| Cluster -1198 | RPL10A                 | 60S ribosomal protein L10a                                                                                                     |
| Cluster -1198 | RPL7A                  | 60S ribosomal protein L7a                                                                                                      |
| Cluster -1198 | UBAP2L                 | Ubiquitin-associated protein 2-like                                                                                            |
| Cluster -1198 | PGD                    | 6-phosphogluconate dehydrogenase, decarboxylating                                                                              |
| Cluster -1198 | FUBP1                  | Far upstream element-binding protein 1                                                                                         |
| Cluster -1198 | PRDX6                  | Peroxiredoxin-6                                                                                                                |
| Cluster -1198 | TPM4                   | Tropomyosin alpha-4 chain                                                                                                      |
| Cluster -1198 | TP53I3                 | Quinone oxidoreductase PIG3                                                                                                    |
| Cluster -1198 | PDLIM2                 | PDZ and LIM domain protein 2                                                                                                   |
| Cluster -1198 | TUBAL3                 | Tubulin alpha chain-like 3                                                                                                     |
| Cluster -1198 | USMG5                  | Up-regulated during skeletal muscle growth protein 5                                                                           |
| Cluster -1198 | PDAP1                  | 28 kDa heat- and acid-stable phosphoprotein                                                                                    |
| Cluster -1198 | SRP9;DKFZp564<br>M2223 | Signal recognition particle 9 kDa protein                                                                                      |
| Cluster -1198 | RPL18A                 | 60S ribosomal protein L18a                                                                                                     |
| Cluster -1198 | PSAT1                  | Phosphoserine aminotransferase                                                                                                 |
| Cluster -1198 | EPB41L2                | Band 4.1-like protein 2                                                                                                        |
| Cluster -1198 | RDX                    | Radixin                                                                                                                        |
| Cluster -1198 | PTK2                   | Focal adhesion kinase 1                                                                                                        |
| Cluster -1198 | APEX1                  | DNA-(apurinic or apyrimidinic site) lyase;DNA-(apurinic or apyrimidinic site) lyase, mitochondrial                             |
| Cluster -1198 | PSMA4                  | Proteasome subunit alpha type-4;Proteasome subunit alpha type;Proteasome subunit beta type                                     |
| Cluster -1198 | UAP1                   | UDP-N-acetylhexosamine pyrophosphorylase;UDP-N-acetylgalactosamine pyrophosphorylase;UDP-N-acetylglucosamine pyrophosphorylase |
| Cluster -1198 | LIMA1                  | LIM domain and actin-binding protein 1                                                                                         |
| Cluster -1198 | NUDC                   | Nuclear migration protein nudC                                                                                                 |
| Cluster -1198 | CAND1                  | Cullin-associated NEDD8-dissociated protein 1                                                                                  |
| Cluster -1198 | BLMH                   | Bleomycin hydrolase                                                                                                            |
| Cluster -1198 | PSMA7;PSMA8            | Proteasome subunit alpha type-7;Proteasome subunit alpha type-7-like                                                           |
| Cluster -1198 | HPRT1                  | Hypoxanthine-guanine phosphoribosyltransferase                                                                                 |
| Cluster -1198 | AP2M1                  | AP-2 complex subunit mu                                                                                                        |
| Cluster -1198 | RAP1GDS1               | Rap1 GTPase-GDP dissociation stimulator 1                                                                                      |
| Cluster -1198 | GBE1                   | 1,4-alpha-glucan-branching enzyme                                                                                              |
| Cluster -1198 | EIF2S1                 | Eukaryotic translation initiation factor 2 subunit 1                                                                           |
| Cluster -1198 | CDC42                  | Cell division control protein 42 homolog                                                                                       |
| Cluster -1198 | PARP4                  | Poly [ADP-ribose] polymerase 4                                                                                                 |
| Cluster -1198 | TPT1                   | Translationally-controlled tumor protein                                                                                       |
| Cluster -1198 | GDI1                   | Rab GDP dissociation inhibitor alpha                                                                                           |
| Cluster -1198 | MACF1                  | Microtubule-actin cross-linking factor 1, isoforms 1/2/3/5                                                                     |

|               |            |                                                                                                      |
|---------------|------------|------------------------------------------------------------------------------------------------------|
| Cluster -1198 | DCTN2      | Dynactin subunit 2                                                                                   |
| Cluster -1198 | TPM3       | N/A                                                                                                  |
| Cluster -1198 | AHSA1      | Activator of 90 kDa heat shock protein ATPase homolog 1                                              |
| Cluster -1198 | CNRIP1     | CB1 cannabinoid receptor-interacting protein 1                                                       |
| Cluster -1198 | KATNAL2    | Katanin p60 ATPase-containing subunit A-like 2                                                       |
| Cluster -1198 | RANBP1     | Ran-specific GTPase-activating protein                                                               |
| Cluster -1198 | KHSRP      | Far upstream element-binding protein 2                                                               |
| Cluster -1198 | PSMB8;PSM8 | Proteasome subunit beta type-8;Proteasome subunit beta type                                          |
| Cluster -1198 | PRPF19     | Pre-mRNA-processing factor 19                                                                        |
| Cluster -1198 | PDCD5      | Programmed cell death protein 5                                                                      |
| Cluster -1198 | RPS19      | 40S ribosomal protein S19                                                                            |
| Cluster -1198 | SF3B4      | Splicing factor 3B subunit 4                                                                         |
| Cluster -1198 | PI4K2A     | Phosphatidylinositol 4-kinase type 2-alpha                                                           |
| Cluster -1198 | WDFY1      | WD repeat and FYVE domain-containing protein 1                                                       |
| Cluster -1198 | COPS2      | COP9 signalosome complex subunit 2                                                                   |
| Cluster -1198 | USP14      | Ubiquitin carboxyl-terminal hydrolase 14;Ubiquitin carboxyl-terminal hydrolase                       |
| Cluster -1198 | VPS29      | Vacuolar protein sorting-associated protein 29                                                       |
| Cluster -1198 | CCDC124    | Coiled-coil domain-containing protein 124                                                            |
| Cluster -1198 | UBE2A      | Ubiquitin-conjugating enzyme E2 A                                                                    |
| Cluster -1198 | IAH1       | Isoamyl acetate-hydrolyzing esterase 1 homolog                                                       |
| Cluster -1198 | PNPO       | Pyridoxine-5-phosphate oxidase                                                                       |
| Cluster -1198 | TXNRD1     | Thioredoxin reductase 1, cytoplasmic                                                                 |
| Cluster -1198 | DYNLRB1    | Dynein light chain roadblock-type 1                                                                  |
| Cluster -1198 | SET;SETSIP | Protein SET;Protein SETSIP                                                                           |
| Cluster -1198 | RRBP1      | Ribosome-binding protein 1                                                                           |
| Cluster -1198 | EIF3B      | Eukaryotic translation initiation factor 3 subunit B                                                 |
| Cluster -1198 | TALDO1     | Transaldolase                                                                                        |
| Cluster -1198 | RPL12      | 60S ribosomal protein L12                                                                            |
| Cluster -1198 | HSP90AB1   | Heat shock protein HSP 90-beta                                                                       |
| Cluster -1198 | WARS       | Tryptophan--tRNA ligase, cytoplasmic;T1-TrpRS;T2-TrpRS                                               |
| Cluster -1198 | PPP1CB     | Serine/threonine-protein phosphatase PP1-beta catalytic subunit;Serine/threonine-protein phosphatase |
| Cluster -1198 | TOM1L2     | TOM1-like protein 2                                                                                  |
| Cluster -1198 | GOLGB1     | Golgin subfamily B member 1                                                                          |
| Cluster -1198 | MTPN       | Myotrophin                                                                                           |
| Cluster -1198 | RAD23B     | UV excision repair protein RAD23 homolog B                                                           |
| Cluster -1198 | ALAD       | Delta-aminolevulinic acid dehydratase                                                                |
| Cluster -1198 | ATOX1      | Copper transport protein ATOX1                                                                       |
| Cluster -1198 | TCP11L1    | T-complex protein 11-like protein 1                                                                  |
| Cluster -1198 | CFL2       | Cofilin-2                                                                                            |

|               |                               |                                                                                                                                             |
|---------------|-------------------------------|---------------------------------------------------------------------------------------------------------------------------------------------|
| Cluster -1198 | RHOA                          | Transforming protein RhoA                                                                                                                   |
| Cluster -1198 | DNAJC8                        | DnaJ homolog subfamily C member 8                                                                                                           |
| Cluster -1198 | PDLIM1                        | PDZ and LIM domain protein 1                                                                                                                |
| Cluster -1198 | SWAP70                        | Switch-associated protein 70                                                                                                                |
| Cluster -1198 | LSM8                          | U6 snRNA-associated Sm-like protein LSm8                                                                                                    |
| Cluster -1198 | UBE2D3;UBE2D2;UBE2D4;UBE2D1   | Ubiquitin-conjugating enzyme E2 D3;Ubiquitin-conjugating enzyme E2 D2;Ubiquitin-conjugating enzyme E2 D4;Ubiquitin-conjugating enzyme E2 D1 |
| Cluster -1198 | FGF2                          | Fibroblast growth factor 2                                                                                                                  |
| Cluster -1198 | DDB1                          | DNA damage-binding protein 1                                                                                                                |
| Cluster -1198 | RAN                           | GTP-binding nuclear protein Ran                                                                                                             |
| Cluster -1198 | GNB2L1                        | Guanine nucleotide-binding protein subunit beta-2-like 1;Guanine nucleotide-binding protein subunit beta-2-like 1, N-terminally processed   |
| Cluster -1198 | RPS11                         | 40S ribosomal protein S11                                                                                                                   |
| Cluster -1198 | NANS                          | Sialic acid synthase                                                                                                                        |
| Cluster -1198 | EIF4H                         | Eukaryotic translation initiation factor 4H                                                                                                 |
| Cluster -1198 | RPL13                         | 60S ribosomal protein L13                                                                                                                   |
| Cluster -1198 | TXNL1                         | Thioredoxin-like protein 1                                                                                                                  |
| Cluster -1198 | RNH1                          | Ribonuclease inhibitor                                                                                                                      |
| Cluster -1198 | HSPH1                         | Heat shock protein 105 kDa                                                                                                                  |
| Cluster -1198 | PCNA                          | Proliferating cell nuclear antigen                                                                                                          |
| Cluster -1198 | CLTA                          | Clathrin light chain A                                                                                                                      |
| Cluster -1198 | GSK3B                         | Glycogen synthase kinase-3 beta                                                                                                             |
| Cluster -1198 | RPL23                         | 60S ribosomal protein L23                                                                                                                   |
| Cluster -1198 | FKBP3                         | Peptidyl-prolyl cis-trans isomerase FKBP3                                                                                                   |
| Cluster -1198 | GRB2                          | Growth factor receptor-bound protein 2                                                                                                      |
| Cluster -1198 | ENSA                          | Alpha-endosulfine                                                                                                                           |
| Cluster -1198 | RPL36AL;RPL36A;RPL36A-HNRNPH2 | 60S ribosomal protein L36a-like;60S ribosomal protein L36a                                                                                  |
| Cluster -1198 | RELA                          | Transcription factor p65                                                                                                                    |
| Cluster -1198 | ST13;ST13P4;ST13P5            | Hsc70-interacting protein;Putative protein FAM10A4;Putative protein FAM10A5                                                                 |
| Cluster -1198 | PSMB3                         | Proteasome subunit beta type-3                                                                                                              |
| Cluster -1198 | EIF4E                         | Eukaryotic translation initiation factor 4E                                                                                                 |
| Cluster -1198 | RPL35                         | 60S ribosomal protein L35                                                                                                                   |
| Cluster -1198 | HIST1H3A                      | Histone H3.1                                                                                                                                |
| Cluster -1198 | TPM1                          | N/A                                                                                                                                         |
| Cluster -1198 | TPD52L2                       | Tumor protein D54                                                                                                                           |
| Cluster -1198 | GNPDA1                        | Glucosamine-6-phosphate isomerase 1;Glucosamine-6-phosphate isomerase                                                                       |
| Cluster -1198 | EIF1;EIF1B                    | Eukaryotic translation initiation factor 1;Eukaryotic                                                                                       |



|               |             |                                                                             |
|---------------|-------------|-----------------------------------------------------------------------------|
|               |             | translation initiation factor 1b                                            |
| Cluster -1198 | STXBP4      | Syntaxin-binding protein 4                                                  |
| Cluster -1198 | S100A11     | Protein S100-A11;Protein S100-A11, N-terminally processed                   |
| Cluster -1198 | TCEB1       | Transcription elongation factor B polypeptide 1                             |
| Cluster -1198 | PSMD10      | 26S proteasome non-ATPase regulatory subunit 10                             |
| Cluster -1198 | LDHB        | L-lactate dehydrogenase B chain;L-lactate dehydrogenase                     |
| Cluster -1198 | MDH1        | Malate dehydrogenase, cytoplasmic;Malate dehydrogenase                      |
| Cluster -1198 | TPI1        | Triosephosphate isomerase                                                   |
| Cluster -1198 | VCL         | Vinculin                                                                    |
| Cluster -1198 | AKR1A1      | Alcohol dehydrogenase [NADP(+)]                                             |
| Cluster -1198 | ADH5        | Alcohol dehydrogenase class-3                                               |
| Cluster -1198 | PFN1        | Profilin-1                                                                  |
| Cluster -1198 | CFL1        | Cofilin-1                                                                   |
| Cluster -1198 | CLIC1       | Chloride intracellular channel protein 1                                    |
| Cluster -1198 | UBQLN1      | Ubiquilin-1                                                                 |
| Cluster -1198 | PSME1       | Proteasome activator complex subunit 1                                      |
| Cluster -1198 | CAP1        | Adenylyl cyclase-associated protein 1                                       |
| Cluster -1198 | UBE2L3      | Ubiquitin-conjugating enzyme E2 L3                                          |
| Cluster -1198 | YWHAB       | 14-3-3 protein beta/alpha;14-3-3 protein beta/alpha, N-terminally processed |
| Cluster -1198 | GSTP1       | Glutathione S-transferase P                                                 |
| Cluster -1198 | YWHAQ       | 14-3-3 protein theta                                                        |
| Cluster -1198 | PARVA       | Alpha-parvin                                                                |
| Cluster -1198 | MOB1B;MOB1A | MOB kinase activator 1B;MOB kinase activator 1A                             |
| Cluster -1198 | TWF2        | Twinfilin-2                                                                 |
| Cluster -1198 | GSTO1       | Glutathione S-transferase omega-1                                           |
| Cluster -1198 | EIF3K       | Eukaryotic translation initiation factor 3 subunit K                        |
| Cluster -1198 | VBP1        | Prefoldin subunit 3                                                         |
| Cluster -1198 | 09-set      | Septin-9                                                                    |
| Cluster -1198 | NUDCD1      | NudC domain-containing protein 1                                            |
| Cluster -1198 | PAK2        | Serine/threonine-protein kinase PAK 2;PAK-2p27;PAK-2p34                     |
| Cluster -1198 | PIN1        | Peptidyl-prolyl cis-trans isomerase NIMA-interacting 1                      |
| Cluster -1198 | PGM1        | Phosphoglucomutase-1                                                        |
| Cluster -1198 | NECAP2      | Adaptin ear-binding coat-associated protein 2                               |
| Cluster -1198 | TXLNA       | Alpha-taxilin                                                               |
| Cluster -1198 | ARL3        | ADP-ribosylation factor-like protein 3                                      |
| Cluster -1198 | PSMB1       | Proteasome subunit beta type-1                                              |
| Cluster -1198 | FARSA       | Phenylalanine--tRNA ligase alpha subunit                                    |
| Cluster -1198 | CBX1        | Chromobox protein homolog 1                                                 |
| Cluster -1198 | TXNDC17     | Thioredoxin domain-containing protein 17                                    |

|               |          |                                                                          |
|---------------|----------|--------------------------------------------------------------------------|
| Cluster -1198 | GPX1     | Glutathione peroxidase 1;Glutathione peroxidase                          |
| Cluster -1198 | C1orf123 | UPF0587 protein C1orf123                                                 |
| Cluster -1198 | NMT1     | Glycylpeptide N-tetradecanoyltransferase 1                               |
| Cluster -1198 | MSN      | Moesin                                                                   |
| Cluster -1198 | GOT1     | Aspartate aminotransferase, cytoplasmic                                  |
| Cluster -1198 | PSMA6    | Proteasome subunit alpha type-6;Proteasome subunit alpha type            |
| Cluster -1198 | AIP      | AH receptor-interacting protein                                          |
| Cluster -1198 | FAM114A1 | Protein NOXP20                                                           |
| Cluster -1198 | RPS21    | 40S ribosomal protein S21                                                |
| Cluster -1198 | MAP4     | Microtubule-associated protein 4;Microtubule-associated protein          |
| Cluster -1198 | PSMB2    | Proteasome subunit beta type-2                                           |
| Cluster -1198 | EXOC7    | Exocyst complex component 7                                              |
| Cluster -1198 | PARK7    | Protein deglycase DJ-1                                                   |
| Cluster -1198 | HDGF     | Hepatoma-derived growth factor                                           |
| Cluster -1198 | PPP1R7   | Protein phosphatase 1 regulatory subunit 7                               |
| Cluster -1198 | PGLS     | 6-phosphogluconolactonase                                                |
| Cluster -1198 | PRKACG   | cAMP-dependent protein kinase catalytic subunit gamma                    |
| Cluster -1198 | OLA1     | Obg-like ATPase 1                                                        |
| Cluster -1198 | EEF1B2   | Elongation factor 1-beta                                                 |
| Cluster -1198 | COTL1    | Coactosin-like protein                                                   |
| Cluster -1198 | EZR      | Ezrin                                                                    |
| Cluster -1198 | DDT;DDTL | D-dopachrome decarboxylase;D-dopachrome decarboxylase-like protein       |
| Cluster -1198 | UBE2I    | SUMO-conjugating enzyme UBC9                                             |
| Cluster -1198 | CORO1C   | Coronin-1C;Coronin                                                       |
| Cluster -1198 | YWHAH    | 14-3-3 protein eta                                                       |
| Cluster -1198 | SCRN2    | Secernin-2                                                               |
| Cluster -1198 | CAST     | Calpastatin                                                              |
| Cluster -1198 | DNAH2    | Dynein heavy chain 2, axonemal                                           |
| Cluster -1198 | CSRP2    | Cysteine and glycine-rich protein 2                                      |
| Cluster -1198 | MAPRE1   | Microtubule-associated protein RP/EB family member 1                     |
| Cluster -1198 | BTF3L4   | Transcription factor BTF3 homolog 4;Transcription factor BTF3            |
| Cluster -1198 | MAP1A    | Microtubule-associated protein 1A;MAP1A heavy chain;MAP1 light chain LC2 |
| Cluster -1198 | RPS13    | 40S ribosomal protein S13                                                |
| Cluster -1198 | OVCA2    | Ovarian cancer-associated gene 2 protein                                 |
| Cluster -1198 | GNPDA2   | Glucosamine-6-phosphate isomerase 2                                      |
| Cluster -1198 | SF1      | Splicing factor 1                                                        |
| Cluster -1198 | BASPI    | Brain acid soluble protein 1                                             |

|               |                       |                                                                                        |
|---------------|-----------------------|----------------------------------------------------------------------------------------|
| Cluster -1198 | ANKRD17               | Ankyrin repeat domain-containing protein 17                                            |
| Cluster -1198 | PITPNB                | Phosphatidylinositol transfer protein beta isoform                                     |
| Cluster -1198 | PSMD9                 | 26S proteasome non-ATPase regulatory subunit 9                                         |
| Cluster -1198 | SH3BGRL3              | SH3 domain-binding glutamic acid-rich-like protein 3                                   |
| Cluster -1198 | RBBP4                 | Histone-binding protein RBBP4                                                          |
| Cluster -1198 | RALA                  | Ras-related protein Ral-A                                                              |
| Cluster -1198 | PLIN3                 | Perilipin-3                                                                            |
| Cluster -1198 | CIRBP                 | Cold-inducible RNA-binding protein                                                     |
| Cluster -1198 | HNRNPDL               | Heterogeneous nuclear ribonucleoprotein D-like                                         |
| Cluster -1198 | PTMA                  | Prothymosin alpha;Prothymosin alpha, N-terminally processed;Thymosin alpha-1           |
| Cluster -1198 | PSME2                 | Proteasome activator complex subunit 2                                                 |
| Cluster -1198 | SERPINB2              | Plasminogen activator inhibitor 2                                                      |
| Cluster -1198 | TMSB4X                | Thymosin beta-4;Hematopoietic system regulatory peptide                                |
| Cluster -1198 | HMOX1                 | Heme oxygenase 1                                                                       |
| Cluster -1198 | SH3BGRL               | SH3 domain-binding glutamic acid-rich-like protein                                     |
| Cluster -1198 | TMEM189-UBE2V1;UBE2V1 | Ubiquitin-conjugating enzyme E2 variant 1                                              |
| Cluster -1198 | GMFB                  | Glia maturation factor beta                                                            |
| Cluster -1198 | CARS                  | Cysteine--tRNA ligase, cytoplasmic                                                     |
| Cluster -1198 | RPS29                 | 40S ribosomal protein S29                                                              |
| Cluster -1198 | STMN1                 | Stathmin                                                                               |
| Cluster -1198 | PHPT1                 | 14 kDa phosphohistidine phosphatase                                                    |
| Cluster -1198 | TAGLN2                | Transgelin-2                                                                           |
| Cluster -1198 | GBP1                  | Interferon-induced guanylate-binding protein 1                                         |
| Cluster -1198 | TXN                   | Thioredoxin                                                                            |
| Cluster -1198 | TKT                   | Transketolase                                                                          |
| Cluster -1198 | RSU1                  | Ras suppressor protein 1                                                               |
| Cluster -1198 | PSMA2                 | Proteasome subunit alpha type-2;Proteasome subunit alpha type                          |
| Cluster -1198 | PYGL                  | Glycogen phosphorylase, liver form;Alpha-1,4 glucan phosphorylase                      |
| Cluster -1198 | CAPG                  | Macrophage-capping protein                                                             |
| Cluster -1198 | CALM2;CALM3;CALM1     | N/A                                                                                    |
| Cluster -1198 | UCHL3                 | Ubiquitin carboxyl-terminal hydrolase isozyme L3;Ubiquitin carboxyl-terminal hydrolase |
| Cluster -1198 | SOD1                  | Superoxide dismutase [Cu-Zn]                                                           |
| Cluster -1198 | EPS15                 | Epidermal growth factor receptor substrate 15                                          |
| Cluster -1198 | HSPA4                 | Heat shock 70 kDa protein 4                                                            |
| Cluster -1198 | PFDN6                 | Prefoldin subunit 6                                                                    |
| Cluster -1198 | CMPK1                 | UMP-CMP kinase                                                                         |

|               |              |                                                                                                    |
|---------------|--------------|----------------------------------------------------------------------------------------------------|
| Cluster -1198 | PPA1         | Inorganic pyrophosphatase                                                                          |
| Cluster -1198 | PSMA5        | Proteasome subunit alpha type-5                                                                    |
| Cluster -1198 | YWHAG        | 14-3-3 protein gamma;14-3-3 protein gamma, N-terminally processed                                  |
| Cluster -1198 | KTN1         | Kinectin                                                                                           |
| Cluster -1198 | RPS28        | 40S ribosomal protein S28                                                                          |
| Cluster -1198 | UBE2N;UBE2NL | Ubiquitin-conjugating enzyme E2 N;Putative ubiquitin-conjugating enzyme E2 N-like                  |
| Cluster -1198 | RPS15        | 40S ribosomal protein S15                                                                          |
| Cluster -1198 | SSB          | Lupus La protein                                                                                   |
| Cluster -1198 | NSFL1C       | NSFL1 cofactor p47                                                                                 |
| Cluster -1198 | UBXN4        | UBX domain-containing protein 4                                                                    |
| Cluster -1198 | BAX          | Apoptosis regulator BAX                                                                            |
| Cluster -1198 | PLCG1        | 1-phosphatidylinositol 4,5-bisphosphate phosphodiesterase gamma-1;Phosphoinositide phospholipase C |
| Cluster -1198 | DBI          | Acyl-CoA-binding protein                                                                           |
| Cluster -1198 | SIPA1        | Signal-induced proliferation-associated protein 1                                                  |
| Cluster -1198 | FAM129B      | Niban-like protein 1                                                                               |
| Cluster -1198 | CNN3         | Calponin-3                                                                                         |
| Cluster -1198 | GNB1         | Guanine nucleotide-binding protein G(I)/G(S)/G(T) subunit beta-1                                   |
| Cluster -1198 | VCP          | Transitional endoplasmic reticulum ATPase                                                          |
| Cluster -1198 | ARHGDI1A     | Rho GDP-dissociation inhibitor 1                                                                   |
| Cluster -1198 | CAPZB        | F-actin-capping protein subunit beta                                                               |
| Cluster -1198 | GYG1         | Glycogenin-1                                                                                       |
| Cluster -1198 | MIF          | Macrophage migration inhibitory factor                                                             |
| Cluster -1198 | PSMA1        | Proteasome subunit alpha type-1;Proteasome subunit alpha type                                      |
| Cluster -1198 | YWHAZ        | 14-3-3 protein zeta/delta                                                                          |
| Cluster -1198 | CSRP1        | Cysteine and glycine-rich protein 1                                                                |
| Cluster -1198 | ETF1         | Eukaryotic peptide chain release factor subunit 1                                                  |
| Cluster -1198 | ENO1         | Alpha-enolase;Enolase                                                                              |
| Cluster -1198 | RPS6         | 40S ribosomal protein S6                                                                           |
| Cluster -1198 | GDI2         | Rab GDP dissociation inhibitor beta                                                                |
| Cluster -1198 | RPL34        | 60S ribosomal protein L34                                                                          |
| Cluster -1198 | NPEPPS       | Puromycin-sensitive aminopeptidase                                                                 |
| Cluster -1198 | UCHL1        | Ubiquitin carboxyl-terminal hydrolase isozyme L1;Ubiquitin carboxyl-terminal hydrolase             |
| Cluster -1198 | PURA         | Transcriptional activator protein Pur-alpha                                                        |
| Cluster -1198 | PSMD4        | 26S proteasome non-ATPase regulatory subunit 4                                                     |
| Cluster -1198 | NAMPT        | Nicotinamide phosphoribosyltransferase                                                             |
| Cluster -1198 | S100A6       | Protein S100-A6;Protein S100                                                                       |
| Cluster -1198 | AKR1B1       | Aldose reductase                                                                                   |

|               |                         |                                                                                             |
|---------------|-------------------------|---------------------------------------------------------------------------------------------|
| Cluster -1198 | SUGT1                   | Suppressor of G2 allele of SKP1 homolog                                                     |
| Cluster -1198 | COPS3                   | COP9 signalosome complex subunit 3                                                          |
| Cluster -1198 | CRK                     | Adapter molecule crk                                                                        |
| Cluster -1198 | PSMA3                   | Proteasome subunit alpha type-3                                                             |
| Cluster -1198 | NME2;NME1-<br>NME2;NME1 | Nucleoside diphosphate kinase B;Nucleoside diphosphate kinase                               |
| Cluster -1198 | CRIP1                   | Cysteine-rich protein 1                                                                     |
| Cluster -1198 | VPS28                   | Vacuolar protein sorting-associated protein 28 homolog                                      |
| Cluster -1198 | UROD                    | Uroporphyrinogen decarboxylase                                                              |
| Cluster -1198 | PFDN1                   | Prefoldin subunit 1                                                                         |
| Cluster -1198 | CAB39                   | Calcium-binding protein 39                                                                  |
| Cluster -1198 | TWF1                    | Twinfilin-1                                                                                 |
| Cluster -1198 | ACTR1B                  | Beta-centractin                                                                             |
| Cluster -1198 | GSS                     | Glutathione synthetase                                                                      |
| Cluster -1198 | GLOD4                   | Glyoxalase domain-containing protein 4                                                      |
| Cluster -1198 | MSRA                    | Mitochondrial peptide methionine sulfoxide reductase                                        |
| Cluster -1198 | PFDN2                   | Prefoldin subunit 2                                                                         |
| Cluster -1198 | STAM                    | Signal transducing adapter molecule 1                                                       |
| Cluster -1198 | GLO1                    | Lactoylglutathione lyase                                                                    |
| Cluster -1198 | PRDX2                   | Peroxiredoxin-2                                                                             |
| Cluster -1198 | LANCL1                  | LanC-like protein 1                                                                         |
| Cluster -1198 | PITPNA                  | Phosphatidylinositol transfer protein alpha isoform                                         |
| Cluster -1198 | ABHD14B                 | Alpha/beta hydrolase domain-containing protein 14B                                          |
| Cluster -1198 | LASP1                   | LIM and SH3 domain protein 1                                                                |
| Cluster -1198 | FKBP1A                  | Peptidyl-prolyl cis-trans isomerase FKBP1A;Peptidyl-prolyl cis-trans isomerase              |
| Cluster -1198 | PEBP1                   | Phosphatidylethanolamine-binding protein 1;Hippocampal cholinergic neurostimulating peptide |
| Cluster -1198 | RPS12                   | 40S ribosomal protein S12                                                                   |
| Cluster -1198 | DDAH2                   | N(G),N(G)-dimethylarginine dimethylaminohydrolase 2                                         |
| Cluster -1198 | NUTF2                   | Nuclear transport factor 2                                                                  |
| Cluster -1198 | UBE2H                   | Ubiquitin-conjugating enzyme E2 H                                                           |
| Cluster -1198 | ASXL2                   | Putative Polycomb group protein ASXL2                                                       |
| Cluster -1198 | CACYBP                  | Calcyclin-binding protein                                                                   |
| Cluster -1198 | LGALS3                  | Galectin-3;Galectin                                                                         |
| Cluster -1198 | LGALS1                  | Galectin-1                                                                                  |
| Cluster -1198 | HARS                    | Histidine--tRNA ligase, cytoplasmic                                                         |
| Cluster -1198 | TSN                     | Translin                                                                                    |
| Cluster -1198 | LTA4H                   | Leukotriene A-4 hydrolase                                                                   |
| Cluster -1198 | PEPD                    | Xaa-Pro dipeptidase                                                                         |
| Cluster -1198 | ENO2                    | Gamma-enolase;Enolase                                                                       |
| Cluster -1199 | ACAT2                   | Acetyl-CoA acetyltransferase, cytosolic                                                     |

|               |                    |                                                                               |
|---------------|--------------------|-------------------------------------------------------------------------------|
| Cluster -1199 | TFG                | Protein TFG                                                                   |
| Cluster -1199 | FKBP8              | Peptidyl-prolyl cis-trans isomerase FKBP8;Peptidyl-prolyl cis-trans isomerase |
| Cluster -1199 | HNRNPH3            | Heterogeneous nuclear ribonucleoprotein H3                                    |
| Cluster -1199 | AP3S1              | AP-3 complex subunit sigma-1                                                  |
| Cluster -1199 | ALYREF             | THO complex subunit 4                                                         |
| Cluster -1199 | UBXN1              | UBX domain-containing protein 1                                               |
| Cluster -1199 | UPF2               | Regulator of nonsense transcripts 2                                           |
| Cluster -1199 | NDUFS4             | NADH dehydrogenase [ubiquinone] iron-sulfur protein 4, mitochondrial          |
| Cluster -1199 | DYNLT1             | Dynein light chain Tctex-type 1                                               |
| Cluster -1199 | ATP5L              | ATP synthase subunit g, mitochondrial                                         |
| Cluster -1199 | BET1;DKFZp781C0425 | BET1 homolog                                                                  |
| Cluster -1199 | APRT               | Adenine phosphoribosyltransferase                                             |
| Cluster -1199 | NENF               | Neudesin                                                                      |
| Cluster -1199 | FAM3C              | Protein FAM3C                                                                 |
| Cluster -1199 | CTPS1              | CTP synthase 1;CTP synthase                                                   |
| Cluster -1199 | ENDOD1             | Endonuclease domain-containing 1 protein                                      |
| Cluster -1199 | KDELRL1            | ER lumen protein-retaining receptor 1;ER lumen protein-retaining receptor     |
| Cluster -1199 | RTN3               | Reticulon-3;Reticulon                                                         |
| Cluster -1199 | ASAH1              | Acid ceramidase;Acid ceramidase subunit alpha;Acid ceramidase subunit beta    |
| Cluster -1199 | TBCD               | Tubulin-specific chaperone D                                                  |
| Cluster -1199 | SGCB               | Beta-sarcoglycan                                                              |
| Cluster -1199 | ATM                | Serine-protein kinase ATM                                                     |
| Cluster -1199 | GCLM               | Glutamate--cysteine ligase regulatory subunit                                 |
| Cluster -1199 | RBM14              | RNA-binding protein 14                                                        |
| Cluster -1199 | ARF1               | ADP-ribosylation factor 1                                                     |
| Cluster -1199 | TPMT               | Thiopurine S-methyltransferase                                                |
| Cluster -1199 | MGLL               | Monoglyceride lipase                                                          |
| Cluster -1199 | MPST               | 3-mercaptopyruvate sulfurtransferase;Sulfurtransferase                        |
| Cluster -1199 | GIGYF2             | PERQ amino acid-rich with GYF domain-containing protein 2                     |
| Cluster -1199 | SRRT               | Serrate RNA effector molecule homolog                                         |
| Cluster -1199 | OCC1;C12orf75      | Overexpressed in colon carcinoma 1 protein                                    |
| Cluster -1199 | APLP2              | Amyloid-like protein 2                                                        |
| Cluster -1199 | SF3A1              | Splicing factor 3A subunit 1                                                  |
| Cluster -1199 | HEBP2              | Heme-binding protein 2                                                        |
| Cluster -1199 | PURB               | Transcriptional activator protein Pur-beta                                    |
| Cluster -1199 | AAK1               | Uncharacterized protein FLJ45252                                              |
| Cluster -1199 | NT5C               | 5(3)-deoxyribonucleotidase, cytosolic type                                    |

|               |               |                                                                                                                                                                                                                                                                                                                                 |
|---------------|---------------|---------------------------------------------------------------------------------------------------------------------------------------------------------------------------------------------------------------------------------------------------------------------------------------------------------------------------------|
| Cluster -1199 | PPP1R18       | Phostensin                                                                                                                                                                                                                                                                                                                      |
| Cluster -1172 | SRP72         | Signal recognition particle subunit SRP72                                                                                                                                                                                                                                                                                       |
| Cluster -1172 | CUL2          | Cullin-2                                                                                                                                                                                                                                                                                                                        |
| Cluster -1172 | NFKB1         | Nuclear factor NF-kappa-B p105 subunit;Nuclear factor NF-kappa-B p50 subunit                                                                                                                                                                                                                                                    |
| Cluster -1172 | ABCF1         | ATP-binding cassette sub-family F member 1                                                                                                                                                                                                                                                                                      |
| Cluster -1172 | SNX2          | Sorting nexin-2                                                                                                                                                                                                                                                                                                                 |
| Cluster -1172 | RBM17         | Splicing factor 45                                                                                                                                                                                                                                                                                                              |
| Cluster -1179 | CD109         | CD109 antigen                                                                                                                                                                                                                                                                                                                   |
| Cluster -1179 | CAMK1         | Calcium/calmodulin-dependent protein kinase type 1                                                                                                                                                                                                                                                                              |
| Cluster -1179 | RBM12B        | RNA-binding protein 12B                                                                                                                                                                                                                                                                                                         |
| Cluster -1179 | SNX8          | Sorting nexin-8                                                                                                                                                                                                                                                                                                                 |
| Cluster -1179 | PPIB          | Peptidyl-prolyl cis-trans isomerase B                                                                                                                                                                                                                                                                                           |
| Cluster -1179 | POFUT2        | GDP-fucose protein O-fucosyltransferase 2                                                                                                                                                                                                                                                                                       |
| Cluster -1179 | EXOC1         | Exocyst complex component 1                                                                                                                                                                                                                                                                                                     |
| Cluster -1179 | RAB8A         | Ras-related protein Rab-8A                                                                                                                                                                                                                                                                                                      |
| Cluster -1179 | GOSR2         | Golgi SNAP receptor complex member 2                                                                                                                                                                                                                                                                                            |
| Cluster -1179 | KPNA1         | Importin subunit alpha-5;Importin subunit alpha-5, N-terminally processed                                                                                                                                                                                                                                                       |
| Cluster -1189 | U2AF2         | Splicing factor U2AF 65 kDa subunit                                                                                                                                                                                                                                                                                             |
| Cluster -1189 | NRD1          | Nardilysin                                                                                                                                                                                                                                                                                                                      |
| Cluster -1189 | PELP1         | Proline-, glutamic acid- and leucine-rich protein 1                                                                                                                                                                                                                                                                             |
| Cluster -1189 | SMAP;C11orf58 | Small acidic protein                                                                                                                                                                                                                                                                                                            |
| Cluster -1189 | DDX23         | Probable ATP-dependent RNA helicase DDX23                                                                                                                                                                                                                                                                                       |
| Cluster -1189 | RAB3GAP1      | Rab3 GTPase-activating protein catalytic subunit                                                                                                                                                                                                                                                                                |
| Cluster -1189 | PSMC6         | 26S protease regulatory subunit 10B                                                                                                                                                                                                                                                                                             |
| Cluster -1189 | CCT4          | T-complex protein 1 subunit delta                                                                                                                                                                                                                                                                                               |
| Cluster -1189 | RDH10         | Retinol dehydrogenase 10                                                                                                                                                                                                                                                                                                        |
| Cluster -1189 | FASN          | Fatty acid synthase;[Acyl-carrier-protein] S-acetyltransferase;[Acyl-carrier-protein] S-malonyltransferase;3-oxoacyl-[acyl-carrier-protein] synthase;3-oxoacyl-[acyl-carrier-protein] reductase;3-hydroxyacyl-[acyl-carrier-protein] dehydratase;Enoyl-[acyl-carrier-protein] reductase;Oleoyl-[acyl-carrier-protein] hydrolase |
| Cluster -1189 | PSMB10        | Proteasome subunit beta type-10                                                                                                                                                                                                                                                                                                 |
| Cluster -1189 | GFPT2         | Glutamine--fructose-6-phosphate aminotransferase [isomerizing] 2                                                                                                                                                                                                                                                                |
| Cluster -1189 | PAPSS1        | Bifunctional 3-phosphoadenosine 5-phosphosulfate synthase 1;Sulfate adenyltransferase;Adenyl-sulfate kinase                                                                                                                                                                                                                     |
| Cluster -1189 | SART3         | Squamous cell carcinoma antigen recognized by T-cells 3                                                                                                                                                                                                                                                                         |
| Cluster -1189 | SRP54         | Signal recognition particle 54 kDa protein                                                                                                                                                                                                                                                                                      |
| Cluster -1189 | HMGCL         | Hydroxymethylglutaryl-CoA lyase, mitochondrial                                                                                                                                                                                                                                                                                  |

|               |         |                                                                                                              |
|---------------|---------|--------------------------------------------------------------------------------------------------------------|
| Cluster -1189 | ATP6AP2 | Renin receptor                                                                                               |
| Cluster -1189 | UBA3    | NEDD8-activating enzyme E1 catalytic subunit                                                                 |
| Cluster -1189 | SYAP1   | Synapse-associated protein 1                                                                                 |
| Cluster -1189 | GCN1L1  | Translational activator GCN1                                                                                 |
| Cluster -1189 | ME2     | NAD-dependent malic enzyme, mitochondrial                                                                    |
| Cluster -1189 | CRTAP   | Cartilage-associated protein                                                                                 |
| Cluster -1189 | SREBF2  | Sterol regulatory element-binding protein 2;Processed sterol regulatory element-binding protein 2            |
| Cluster -1189 | GALNT2  | Polypeptide N-acetylgalactosaminyltransferase 2;Polypeptide N-acetylgalactosaminyltransferase 2 soluble form |
| Cluster -1189 | ALDH1L1 | Cytosolic 10-formyltetrahydrofolate dehydrogenase                                                            |
| Cluster -1189 | MCM7    | DNA replication licensing factor MCM7                                                                        |
| Cluster -1189 | AGO2    | Protein argonaute-2                                                                                          |
| Cluster -1189 | UBA5    | Ubiquitin-like modifier-activating enzyme 5                                                                  |
| Cluster -1189 | RPL14   | 60S ribosomal protein L14                                                                                    |
| Cluster -1189 | TMEM173 | Stimulator of interferon genes protein                                                                       |
| Cluster -1189 | TCF25   | Transcription factor 25                                                                                      |
| Cluster -1189 | PRKDC   | DNA-dependent protein kinase catalytic subunit                                                               |
| Cluster -1189 | SF3A3   | Splicing factor 3A subunit 3                                                                                 |
| Cluster -1189 | NRBF2   | Nuclear receptor-binding factor 2                                                                            |
| Cluster -1189 | GCC2    | GRIP and coiled-coil domain-containing protein 2                                                             |
| Cluster -1189 | SKIV2L2 | Superkiller viralicidic activity 2-like 2                                                                    |
| Cluster -1189 | PTK7    | Inactive tyrosine-protein kinase 7                                                                           |
| Cluster -1189 | PMPCB   | Mitochondrial-processing peptidase subunit beta                                                              |
| Cluster -1189 | TTLL5   | Tubulin polyglutamylase TTLL5                                                                                |
| Cluster -1189 | POP1    | Ribonucleases P/MRP protein subunit POP1                                                                     |
| Cluster -1189 | EML3    | Echinoderm microtubule-associated protein-like 3                                                             |
| Cluster -1189 | DPY30   | Protein dpy-30 homolog                                                                                       |
| Cluster -1189 | COASY   | Bifunctional coenzyme A synthase;Phosphopantetheine adenylyltransferase;Dephospho-CoA kinase                 |
| Cluster -1189 | MICU1   | Calcium uptake protein 1, mitochondrial                                                                      |
| Cluster -1189 | DDX24   | ATP-dependent RNA helicase DDX24                                                                             |
| Cluster -1189 | FBLN2   | Fibulin-2                                                                                                    |
| Cluster -1189 | ABCB6   | ATP-binding cassette sub-family B member 6, mitochondrial                                                    |
| Cluster -1189 | PDS5A   | Sister chromatid cohesion protein PDS5 homolog A                                                             |
| Cluster -1189 | MTOR    | Serine/threonine-protein kinase mTOR                                                                         |
| Cluster -1189 | PLA2G15 | Group XV phospholipase A2                                                                                    |
| Cluster -1189 | OGT     | UDP-N-acetylglucosamine--peptide N-acetylglucosaminyltransferase 110 kDa subunit                             |
| Cluster -1189 | NUP54   | Nucleoporin p54                                                                                              |
| Cluster -1189 | CNP     | 2,3-cyclic-nucleotide 3-phosphodiesterase                                                                    |
| Cluster -1189 | PLXNB2  | Plexin-B2                                                                                                    |



|               |                   |                                                                                                                  |
|---------------|-------------------|------------------------------------------------------------------------------------------------------------------|
| Cluster -1189 | PEX19             | Peroxisomal biogenesis factor 19                                                                                 |
| Cluster -1189 | DFFA              | DNA fragmentation factor subunit alpha                                                                           |
| Cluster -1189 | PPFIBP1           | Liprin-beta-1                                                                                                    |
| Cluster -1189 | PLCB3             | 1-phosphatidylinositol 4,5-bisphosphate phosphodiesterase beta-3                                                 |
| Cluster -1189 | ESYT2             | Extended synaptotagmin-2                                                                                         |
| Cluster -1189 | APOOL             | MICOS complex subunit MIC27                                                                                      |
| Cluster -1189 | GTF2I             | General transcription factor II-I                                                                                |
| Cluster -1189 | FNDC3B            | Fibronectin type III domain-containing protein 3B                                                                |
| Cluster -1189 | NDUFB10           | NADH dehydrogenase [ubiquinone] 1 beta subcomplex subunit 10                                                     |
| Cluster -1189 | DAPK3             | Death-associated protein kinase 3                                                                                |
| Cluster -1189 | LZTFL1            | Leucine zipper transcription factor-like protein 1                                                               |
| Cluster -1189 | PSME3             | Proteasome activator complex subunit 3                                                                           |
| Cluster -1189 | RAP2B;RAP2C;RAP2A | Ras-related protein Rap-2b;Ras-related protein Rap-2c;Ras-related protein Rap-2a                                 |
| Cluster -1189 | NOC4L             | Nucleolar complex protein 4 homolog                                                                              |
| Cluster -1189 | MYO5A             | Unconventional myosin-Va                                                                                         |
| Cluster -1189 | SNRNP200          | U5 small nuclear ribonucleoprotein 200 kDa helicase                                                              |
| Cluster -1189 | VPS26B            | Vacuolar protein sorting-associated protein 26B                                                                  |
| Cluster -1189 | PI4KA             | Phosphatidylinositol 4-kinase alpha                                                                              |
| Cluster -1189 | TCERG1            | Transcription elongation regulator 1                                                                             |
| Cluster -1189 | PSMD8             | 26S proteasome non-ATPase regulatory subunit 8                                                                   |
| Cluster -1189 | BCKDHA            | 2-oxoisovalerate dehydrogenase subunit alpha, mitochondrial                                                      |
| Cluster -1189 | ABR;BCR           | Active breakpoint cluster region-related protein;Breakpoint cluster region protein                               |
| Cluster -1189 | NDUFA6            | NADH dehydrogenase [ubiquinone] 1 alpha subcomplex subunit 6                                                     |
| Cluster -1189 | GLT8D2            | Glycosyltransferase 8 domain-containing protein 2                                                                |
| Cluster -1189 | CLCC1             | Chloride channel CLIC-like protein 1                                                                             |
| Cluster -1189 | HACD2             | Very-long-chain (3R)-3-hydroxyacyl-CoA dehydratase 2                                                             |
| Cluster -1189 | C17orf62          | Uncharacterized protein C17orf62                                                                                 |
| Cluster -1189 | TRAPPC8           | Trafficking protein particle complex subunit 8                                                                   |
| Cluster -1189 | POFUT1            | GDP-fucose protein O-fucosyltransferase 1                                                                        |
| Cluster -1189 | PNPLA6            | Neuropathy target esterase                                                                                       |
| Cluster -1189 | ADRA2A            | Alpha-2A adrenergic receptor                                                                                     |
| Cluster -1189 | C20orf27          | UPF0687 protein C20orf27                                                                                         |
| Cluster -1189 | IDH3B             | Isocitrate dehydrogenase [NAD] subunit beta, mitochondrial;Isocitrate dehydrogenase [NAD] subunit, mitochondrial |
| Cluster -1189 | GPR108            | Protein GPR108                                                                                                   |
| Cluster -1189 | LRCH3             | Leucine-rich repeat and calponin homology domain-containing protein 3                                            |

|               |           |                                                                                                        |
|---------------|-----------|--------------------------------------------------------------------------------------------------------|
| Cluster -1189 | VANGL1    | Vang-like protein 1                                                                                    |
| Cluster -1189 | COL11A1   | Collagen alpha-1(XI) chain                                                                             |
| Cluster -1189 | AKAP9     | A-kinase anchor protein 9                                                                              |
| Cluster -1189 | YES1      | Tyrosine-protein kinase Yes;Non-specific protein-tyrosine kinase                                       |
| Cluster -1189 | TRIO      | Triple functional domain protein                                                                       |
| Cluster -1189 | TMED5     | Transmembrane emp24 domain-containing protein 5                                                        |
| Cluster -1189 | SZRD1     | SUZ domain-containing protein 1                                                                        |
| Cluster -1189 | HKDC1     | Putative hexokinase HKDC1                                                                              |
| Cluster -1189 | LINC00483 | Putative uncharacterized protein encoded by LINC00483                                                  |
| Cluster -1189 | TOP1      | DNA topoisomerase 1                                                                                    |
| Cluster -1189 | C6orf163  | Uncharacterized protein C6orf163                                                                       |
| Cluster -1189 | CHERP     | Calcium homeostasis endoplasmic reticulum protein                                                      |
| Cluster -1189 | NAA15     | N-alpha-acetyltransferase 15, NatA auxiliary subunit                                                   |
| Cluster -1189 | IMPA1     | Inositol monophosphatase 1                                                                             |
| Cluster -1189 | SRP19     | Signal recognition particle 19 kDa protein                                                             |
| Cluster -1189 | CHMP6     | Charged multivesicular body protein 6                                                                  |
| Cluster -1189 | HACD3     | Very-long-chain (3R)-3-hydroxyacyl-CoA dehydratase 3                                                   |
| Cluster -1189 | TACO1     | Translational activator of cytochrome c oxidase 1                                                      |
| Cluster -1189 | NTPCR     | Cancer-related nucleoside-triphosphatase                                                               |
| Cluster -1189 | SLC25A4   | ADP/ATP translocase 1                                                                                  |
| Cluster -1189 | UQCRCQ    | Cytochrome b-c1 complex subunit 8                                                                      |
| Cluster -1189 | VKORC1L1  | Vitamin K epoxide reductase complex subunit 1-like protein 1                                           |
| Cluster -1189 | REXO2     | Oligoribonuclease, mitochondrial                                                                       |
| Cluster -1189 | GTPBP4    | Nucleolar GTP-binding protein 1                                                                        |
| Cluster -1189 | LEPREL2   | Prolyl 3-hydroxylase 3                                                                                 |
| Cluster -1189 | ITGA6     | Integrin alpha-6;Integrin alpha-6 heavy chain;Integrin alpha-6 light chain;Processed integrin alpha-6  |
| Cluster -1189 | EEFSEC    | Selenocysteine-specific elongation factor                                                              |
| Cluster -1189 | TBK1      | Serine/threonine-protein kinase TBK1                                                                   |
| Cluster -1189 | PYCR2     | Pyrroline-5-carboxylate reductase 2;Pyrroline-5-carboxylate reductase                                  |
| Cluster -1189 | MCTS1     | Malignant T-cell-amplified sequence 1                                                                  |
| Cluster -1189 | FSIP2     | Fibrous sheath-interacting protein 2                                                                   |
| Cluster -1189 | NOTCH2    | Neurogenic locus notch homolog protein 2;Notch 2 extracellular truncation;Notch 2 intracellular domain |
| Cluster -1189 | MRPS36    | 28S ribosomal protein S36, mitochondrial                                                               |
| Cluster -1189 | NES       | Nestin                                                                                                 |
| Cluster -1189 | GPC4      | Glypican-4;Secreted glypican-4                                                                         |
| Cluster -1189 | NUDT19    | Nucleoside diphosphate-linked moiety X motif 19, mitochondrial                                         |
| Cluster -1189 | SERPINB6  | Serpin B6                                                                                              |

|               |                      |                                                                                                                |
|---------------|----------------------|----------------------------------------------------------------------------------------------------------------|
| Cluster -1189 | HSPB2;HSPB2-C11orf52 | Heat shock protein beta-2                                                                                      |
| Cluster -1193 | CSNK2A1;CSNK2A3      | Casein kinase II subunit alpha;Casein kinase II subunit alpha 3                                                |
| Cluster -1193 | TNFAIP2              | Tumor necrosis factor alpha-induced protein 2                                                                  |
| Cluster -1193 | LRPPRC               | Leucine-rich PPR motif-containing protein, mitochondrial                                                       |
| Cluster -1193 | COL6A2               | Collagen alpha-2(VI) chain                                                                                     |
| Cluster -1193 | COL6A1               | Collagen alpha-1(VI) chain                                                                                     |
| Cluster -1193 | SDF4                 | 45 kDa calcium-binding protein                                                                                 |
| Cluster -1193 | NPC2                 | Epididymal secretory protein E1                                                                                |
| Cluster -1193 | PTGIS                | Prostacyclin synthase                                                                                          |
| Cluster -1193 | PDIA5                | Protein disulfide-isomerase A5                                                                                 |
| Cluster -1193 | PYCR1                | Pyroline-5-carboxylate reductase 1, mitochondrial;Pyroline-5-carboxylate reductase                             |
| Cluster -1193 | SERPINH1             | Serpin H1                                                                                                      |
| Cluster -1193 | ALDH1L2              | Mitochondrial 10-formyltetrahydrofolate dehydrogenase                                                          |
| Cluster -1193 | MALSU1               | Mitochondrial assembly of ribosomal large subunit protein 1                                                    |
| Cluster -1193 | N/A                  | N/a                                                                                                            |
| Cluster -1193 | ACAA2                | 3-ketoacyl-CoA thiolase, mitochondrial                                                                         |
| Cluster -1193 | GPD2                 | Glycerol-3-phosphate dehydrogenase, mitochondrial                                                              |
| Cluster -1193 | RANBP2               | E3 SUMO-protein ligase RanBP2                                                                                  |
| Cluster -1193 | DCN                  | Decorin                                                                                                        |
| Cluster -1193 | FUT8                 | Alpha-(1,6)-fucosyltransferase                                                                                 |
| Cluster -1193 | CCDC90B              | Coiled-coil domain-containing protein 90B, mitochondrial                                                       |
| Cluster -1193 | CTHRC1               | Collagen triple helix repeat-containing protein 1                                                              |
| Cluster -1193 | MRPS31               | 28S ribosomal protein S31, mitochondrial                                                                       |
| Cluster -1193 | SSR4                 | Translocon-associated protein subunit delta                                                                    |
| Cluster -1193 | GPR107               | Protein GPR107                                                                                                 |
| Cluster -1193 | STT3A                | Dolichyl-diphosphooligosaccharide--protein glycosyltransferase subunit STT3A                                   |
| Cluster -1193 | ABCF3                | ATP-binding cassette sub-family F member 3                                                                     |
| Cluster -1193 | UFSP2                | Ufm1-specific protease 2                                                                                       |
| Cluster -1193 | SIGMAR1              | Sigma non-opioid intracellular receptor 1                                                                      |
| Cluster -1193 | SLC25A1              | Tricarboxylate transport protein, mitochondrial                                                                |
| Cluster -1193 | ETFA                 | Electron transfer flavoprotein subunit alpha, mitochondrial                                                    |
| Cluster -1193 | GSTA2;GSTA1          | Glutathione S-transferase A2;Glutathione S-transferase A1;Glutathione S-transferase A1, N-terminally processed |
| Cluster -1193 | NPM3                 | Nucleoplasmin-3                                                                                                |
| Cluster -1193 | NAT1                 | Arylamine N-acetyltransferase 1                                                                                |
| Cluster -1193 | NDUFS3               | NADH dehydrogenase [ubiquinone] iron-sulfur protein 3, mitochondrial                                           |
| Cluster -1193 | NDUFA5               | NADH dehydrogenase [ubiquinone] 1 alpha subcomplex subunit 5                                                   |

|               |               |                                                                                                                                                                                  |
|---------------|---------------|----------------------------------------------------------------------------------------------------------------------------------------------------------------------------------|
| Cluster -1193 | MTHFD2        | Bifunctional methylenetetrahydrofolate dehydrogenase/cyclohydrolase, mitochondrial;NAD-dependent methylenetetrahydrofolate dehydrogenase;Methenyltetrahydrofolate cyclohydrolase |
| Cluster -1193 | ANP32E        | Acidic leucine-rich nuclear phosphoprotein 32 family member E                                                                                                                    |
| Cluster -1193 | AHCYL1        | Putative adenosylhomocysteinase 2                                                                                                                                                |
| Cluster -1193 | RABGEF1       | Rab5 GDP/GTP exchange factor                                                                                                                                                     |
| Cluster -1193 | FKBP14        | Peptidyl-prolyl cis-trans isomerase FKBP14;Peptidyl-prolyl cis-trans isomerase                                                                                                   |
| Cluster -1193 | SH3GL1;SH3GL2 | Endophilin-A2;Endophilin-A1                                                                                                                                                      |
| Cluster -1193 | DDX19A;DDX19B | ATP-dependent RNA helicase DDX19A;ATP-dependent RNA helicase DDX19B                                                                                                              |
| Cluster -1193 | HEATR5A       | HEAT repeat-containing protein 5A                                                                                                                                                |
| Cluster -1193 | DNAH9         | Dynein heavy chain 9, axonemal                                                                                                                                                   |
| Cluster -1193 | FXR1          | Fragile X mental retardation syndrome-related protein 1                                                                                                                          |
| Cluster -1193 | HBS1L         | HBS1-like protein                                                                                                                                                                |
| Cluster -1193 | RBCK1         | RanBP-type and C3HC4-type zinc finger-containing protein 1                                                                                                                       |
| Cluster -1193 | TIMP3         | Metalloproteinase inhibitor 3                                                                                                                                                    |
| Cluster -1193 | CNPY3         | Protein canopy homolog 3                                                                                                                                                         |
| Cluster -1193 | MXRA5         | Matrix-remodeling-associated protein 5                                                                                                                                           |
| Cluster -1193 | ARL8A;ARL8B   | ADP-ribosylation factor-like protein 8A;ADP-ribosylation factor-like protein 8B                                                                                                  |
| Cluster -1193 | DNM2          | Dynamamin-2                                                                                                                                                                      |
| Cluster -1193 | PRELP         | Prolargin                                                                                                                                                                        |
| Cluster -1193 | TOMM40        | Mitochondrial import receptor subunit TOM40 homolog                                                                                                                              |
| Cluster -1193 | DROSHA        | Ribonuclease 3                                                                                                                                                                   |
| Cluster -1193 | SEC61G        | Protein transport protein Sec61 subunit gamma                                                                                                                                    |
| Cluster -1193 | SLC25A3       | Phosphate carrier protein, mitochondrial                                                                                                                                         |
| Cluster -1193 | AIFM1         | Apoptosis-inducing factor 1, mitochondrial                                                                                                                                       |
| Cluster -1193 | CKAP4         | Cytoskeleton-associated protein 4                                                                                                                                                |
| Cluster -1193 | C1QBP         | Complement component 1 Q subcomponent-binding protein, mitochondrial                                                                                                             |
| Cluster -1193 | HSPA9         | Stress-70 protein, mitochondrial                                                                                                                                                 |
| Cluster -1193 | HSPD1         | 60 kDa heat shock protein, mitochondrial                                                                                                                                         |
| Cluster -1193 | TCEA1;TCEA2   | Transcription elongation factor A protein 1;Transcription elongation factor A protein 2                                                                                          |
| Cluster -1193 | SSR1          | Translocon-associated protein subunit alpha                                                                                                                                      |
| Cluster -1193 | COLGALT1      | Procollagen galactosyltransferase 1                                                                                                                                              |
| Cluster -1193 | GMPS          | GMP synthase [glutamine-hydrolyzing]                                                                                                                                             |
| Cluster -1193 | OSBPL8        | Oxysterol-binding protein-related protein 8;Oxysterol-binding protein                                                                                                            |

|               |           |                                                                                                           |
|---------------|-----------|-----------------------------------------------------------------------------------------------------------|
| Cluster -1193 | DAG1      | Dystroglycan;Alpha-dystroglycan;Beta-dystroglycan                                                         |
| Cluster -1193 | PPP6R2    | Serine/threonine-protein phosphatase 6 regulatory subunit 2                                               |
| Cluster -1193 | VDAC1     | Voltage-dependent anion-selective channel protein 1                                                       |
| Cluster -1193 | AAK1      | AP2-associated protein kinase 1                                                                           |
| Cluster -1193 | NAV1      | Neuron navigator 1                                                                                        |
| Cluster -1193 | NDUFV1    | NADH dehydrogenase [ubiquinone] flavoprotein 1, mitochondrial                                             |
| Cluster -1193 | ZMPSTE24  | CAAX prenyl protease 1 homolog                                                                            |
| Cluster -1193 | MRPS16    | 28S ribosomal protein S16, mitochondrial                                                                  |
| Cluster -1193 | DNAH1     | Dynein heavy chain 1, axonemal                                                                            |
| Cluster -1193 | AIFM2     | Apoptosis-inducing factor 2                                                                               |
| Cluster -1193 | C6orf120  | UPF0669 protein C6orf120                                                                                  |
| Cluster -1193 | ACSL4     | Long-chain-fatty-acid--CoA ligase 4                                                                       |
| Cluster -1193 | EMC8      | ER membrane protein complex subunit 8                                                                     |
| Cluster -1193 | HSD17B4   | Peroxisomal multifunctional enzyme type 2;(3R)-hydroxyacyl-CoA dehydrogenase;Enoyl-CoA hydratase 2        |
| Cluster -1193 | NRP1      | Neuropilin-1                                                                                              |
| Cluster -1193 | PTGES2    | Prostaglandin E synthase 2;Prostaglandin E synthase 2 truncated form                                      |
| Cluster -1193 | TMED10    | Transmembrane emp24 domain-containing protein 10                                                          |
| Cluster -1193 | FH        | Fumarate hydratase, mitochondrial                                                                         |
| Cluster -1193 | FXN       | Frataxin, mitochondrial;Frataxin intermediate form;Frataxin(56-210);Frataxin(78-210);Frataxin mature form |
| Cluster -1193 | CLPX      | ATP-dependent Clp protease ATP-binding subunit clpX-like, mitochondrial                                   |
| Cluster -1193 | SPON1     | Spondin-1                                                                                                 |
| Cluster -1193 | GRPEL1    | GrpE protein homolog 1, mitochondrial                                                                     |
| Cluster -1193 | FCRL2     | Fc receptor-like protein 2                                                                                |
| Cluster -1193 | TBRG4     | Protein TBRG4                                                                                             |
| Cluster -1193 | CCDC80    | Coiled-coil domain-containing protein 80                                                                  |
| Cluster -1193 | TGFBI     | Transforming growth factor-beta-induced protein ig-h3                                                     |
| Cluster -1193 | DKK1;DKK2 | Dickkopf-related protein 1;Dickkopf-related protein 2                                                     |
| Cluster -1193 | VCAN      | Versican core protein                                                                                     |
| Cluster -1193 | ACADM     | Medium-chain specific acyl-CoA dehydrogenase, mitochondrial                                               |
| Cluster -1193 | IGFBP2    | Insulin-like growth factor-binding protein 2                                                              |
| Cluster -1193 | BSG       | Basigin                                                                                                   |
| Cluster -1193 | DNAH8     | Dynein heavy chain 8, axonemal                                                                            |
| Cluster -1193 | ASPH      | Aspartyl/asparaginyl beta-hydroxylase                                                                     |
| Cluster -1193 | TECR      | Very-long-chain enoyl-CoA reductase                                                                       |
| Cluster -1193 | TMX4      | Thioredoxin-related transmembrane protein 4                                                               |
| Cluster -1193 | DNAJA3    | DnaJ homolog subfamily A member 3, mitochondrial                                                          |

|               |                            |                                                                                                                                                               |
|---------------|----------------------------|---------------------------------------------------------------------------------------------------------------------------------------------------------------|
| Cluster -1193 | NUP205                     | Nuclear pore complex protein Nup205                                                                                                                           |
| Cluster -1193 | KIAA0196                   | WASH complex subunit strumpellin                                                                                                                              |
| Cluster -1193 | HNRNPUL1                   | Heterogeneous nuclear ribonucleoprotein U-like protein 1                                                                                                      |
| Cluster -1193 | NUP155                     | Nuclear pore complex protein Nup155                                                                                                                           |
| Cluster -1193 | GOT2                       | Aspartate aminotransferase, mitochondrial                                                                                                                     |
| Cluster -1193 | BCAP31                     | B-cell receptor-associated protein 31                                                                                                                         |
| Cluster -1193 | SUSD2                      | Sushi domain-containing protein 2                                                                                                                             |
| Cluster -1193 | PDS5B                      | Sister chromatid cohesion protein PDS5 homolog B                                                                                                              |
| Cluster -1193 | MON2                       | Protein MON2 homolog                                                                                                                                          |
| Cluster -1193 | ODR4                       | Protein odr-4 homolog                                                                                                                                         |
| Cluster -1193 | UGGT2                      | UDP-glucose:glycoprotein glucosyltransferase 2                                                                                                                |
| Cluster -1193 | UQCRFS1;UQC<br>RFS1P1      | Cytochrome b-c1 complex subunit Rieske,<br>mitochondrial;Cytochrome b-c1 complex subunit 11;Putative<br>cytochrome b-c1 complex subunit Rieske-like protein 1 |
| Cluster -1193 | FECH                       | Ferrochelatase, mitochondrial                                                                                                                                 |
| Cluster -1193 | LPAR1                      | Lysophosphatidic acid receptor 1                                                                                                                              |
| Cluster -1193 | SPCS2                      | Signal peptidase complex subunit 2                                                                                                                            |
| Cluster -1193 | PRIM2                      | DNA primase large subunit                                                                                                                                     |
| Cluster -1193 | SLC30A1                    | Zinc transporter 1                                                                                                                                            |
| Cluster -1193 | SAR1A                      | GTP-binding protein SAR1a                                                                                                                                     |
| Cluster -1193 | NDUFA8                     | NADH dehydrogenase [ubiquinone] 1 alpha subcomplex<br>subunit 8                                                                                               |
| Cluster -1193 | ASH2L                      | Set1/Ash2 histone methyltransferase complex subunit ASH2                                                                                                      |
| Cluster -1193 | SAR1B;SAR1A                | GTP-binding protein SAR1b                                                                                                                                     |
| Cluster -1193 | POLDIP2                    | Polymerase delta-interacting protein 2                                                                                                                        |
| Cluster -1193 | DDX50                      | ATP-dependent RNA helicase DDX50                                                                                                                              |
| Cluster -1193 | ARHGEF2                    | Rho guanine nucleotide exchange factor 2                                                                                                                      |
| Cluster -1193 | YARS2                      | Tyrosine--tRNA ligase, mitochondrial;Tyrosine--tRNA ligase                                                                                                    |
| Cluster -1193 | HSDL2                      | Hydroxysteroid dehydrogenase-like protein 2                                                                                                                   |
| Cluster -1193 | ATP6AP1                    | V-type proton ATPase subunit S1                                                                                                                               |
| Cluster -1193 | CNIH4                      | Protein cornichon homolog 4                                                                                                                                   |
| Cluster -1193 | SRGAP2;SRGAP<br>2C;SRGAP2B | SLIT-ROBO Rho GTPase-activating protein 2;SLIT-ROBO<br>Rho GTPase-activating protein 2C;SLIT-ROBO Rho<br>GTPase-activating protein 2B                         |
| Cluster -1193 | SUCLA2                     | Succinyl-CoA ligase [ADP-forming] subunit beta,<br>mitochondrial                                                                                              |
| Cluster -1193 | FTH1                       | Ferritin heavy chain;Ferritin heavy chain, N-terminally<br>processed;Ferritin                                                                                 |
| Cluster -1193 | TMEM205                    | Transmembrane protein 205                                                                                                                                     |
| Cluster -1193 | HLA-C                      | HLA class I histocompatibility antigen, Cw-7 alpha chain                                                                                                      |
| Cluster -1193 | STON2                      | Stonin-2                                                                                                                                                      |
| Cluster -1193 | ATP5J                      | ATP synthase-coupling factor 6, mitochondrial                                                                                                                 |
| Cluster -1193 | FAM180A                    | Protein FAM180A                                                                                                                                               |

|               |          |                                                                                                                                                                                                                                                                                                        |
|---------------|----------|--------------------------------------------------------------------------------------------------------------------------------------------------------------------------------------------------------------------------------------------------------------------------------------------------------|
| Cluster -1193 | LSS      | Lanosterol synthase                                                                                                                                                                                                                                                                                    |
| Cluster -1193 | DBT      | Lipoamide acyltransferase component of branched-chain alpha-keto acid dehydrogenase complex, mitochondrial                                                                                                                                                                                             |
| Cluster -1193 | HCFC1    | Host cell factor 1;HCF N-terminal chain 1;HCF N-terminal chain 2;HCF N-terminal chain 3;HCF N-terminal chain 4;HCF N-terminal chain 5;HCF N-terminal chain 6;HCF C-terminal chain 1;HCF C-terminal chain 2;HCF C-terminal chain 3;HCF C-terminal chain 4;HCF C-terminal chain 5;HCF C-terminal chain 6 |
| Cluster -1193 | ADAM10   | Disintegrin and metalloproteinase domain-containing protein 10                                                                                                                                                                                                                                         |
| Cluster -1193 | COL5A2   | Collagen alpha-2(V) chain                                                                                                                                                                                                                                                                              |
| Cluster -1193 | PLOD1    | Procollagen-lysine,2-oxoglutarate 5-dioxygenase 1                                                                                                                                                                                                                                                      |
| Cluster -1193 | LEMD2    | LEM domain-containing protein 2                                                                                                                                                                                                                                                                        |
| Cluster -1193 | PRDX4    | Peroxiredoxin-4                                                                                                                                                                                                                                                                                        |
| Cluster -1193 | CALR     | Calreticulin                                                                                                                                                                                                                                                                                           |
| Cluster -1193 | PSMD11   | 26S proteasome non-ATPase regulatory subunit 11                                                                                                                                                                                                                                                        |
| Cluster -1193 | RPL21    | 60S ribosomal protein L21                                                                                                                                                                                                                                                                              |
| Cluster -1193 | ILK      | Integrin-linked protein kinase                                                                                                                                                                                                                                                                         |
| Cluster -1193 | RPL9     | 60S ribosomal protein L9                                                                                                                                                                                                                                                                               |
| Cluster -1193 | NOP58    | Nucleolar protein 58                                                                                                                                                                                                                                                                                   |
| Cluster -1193 | KIAA0020 | Pumilio domain-containing protein KIAA0020                                                                                                                                                                                                                                                             |
| Cluster -1193 | DHX9     | ATP-dependent RNA helicase A                                                                                                                                                                                                                                                                           |
| Cluster -1193 | MDH2     | Malate dehydrogenase, mitochondrial;Malate dehydrogenase                                                                                                                                                                                                                                               |
| Cluster -1193 | FBN1     | Fibrillin-1                                                                                                                                                                                                                                                                                            |
| Cluster -1193 | NDUFS2   | NADH dehydrogenase [ubiquinone] iron-sulfur protein 2, mitochondrial                                                                                                                                                                                                                                   |
| Cluster -1193 | XRCC5    | X-ray repair cross-complementing protein 5                                                                                                                                                                                                                                                             |
| Cluster -1193 | FKBP7    | Peptidyl-prolyl cis-trans isomerase FKBP7                                                                                                                                                                                                                                                              |
| Cluster -1193 | RCN1     | Reticulocalbin-1                                                                                                                                                                                                                                                                                       |
| Cluster -1193 | LRP1     | Prolow-density lipoprotein receptor-related protein 1;Low-density lipoprotein receptor-related protein 1 85 kDa subunit;Low-density lipoprotein receptor-related protein 1 515 kDa subunit;Low-density lipoprotein receptor-related protein 1 intracellular domain                                     |
| Cluster -1193 | RPS15A   | 40S ribosomal protein S15a                                                                                                                                                                                                                                                                             |
| Cluster -1193 | CDH11    | Cadherin-11                                                                                                                                                                                                                                                                                            |
| Cluster -1193 | LMAN1    | Protein ERGIC-53                                                                                                                                                                                                                                                                                       |
| Cluster -1193 | OAT      | Ornithine aminotransferase, mitochondrial;Ornithine aminotransferase, hepatic form;Ornithine aminotransferase, renal form                                                                                                                                                                              |
| Cluster -1193 | WDR18    | WD repeat-containing protein 18                                                                                                                                                                                                                                                                        |
| Cluster -1193 | UBTF     | Nucleolar transcription factor 1                                                                                                                                                                                                                                                                       |
| Cluster -1193 | FNDC3A   | Fibronectin type-III domain-containing protein 3A                                                                                                                                                                                                                                                      |

|               |                      |                                                                                                             |
|---------------|----------------------|-------------------------------------------------------------------------------------------------------------|
| Cluster -1193 | NUP133               | Nuclear pore complex protein Nup133                                                                         |
| Cluster -1193 | SHMT2                | Serine hydroxymethyltransferase, mitochondrial;Serine hydroxymethyltransferase                              |
| Cluster -1193 | DHX15                | Pre-mRNA-splicing factor ATP-dependent RNA helicase DHX15                                                   |
| Cluster -1193 | MRPL2                | 39S ribosomal protein L2, mitochondrial                                                                     |
| Cluster -1193 | HNRNPH1              | Heterogeneous nuclear ribonucleoprotein H;Heterogeneous nuclear ribonucleoprotein H, N-terminally processed |
| Cluster -1193 | EMILIN1              | EMILIN-1                                                                                                    |
| Cluster -1193 | RALY                 | RNA-binding protein Raly                                                                                    |
| Cluster -1193 | TRIM28               | Transcription intermediary factor 1-beta                                                                    |
| Cluster -1193 | RPL3                 | 60S ribosomal protein L3                                                                                    |
| Cluster -1193 | FBL                  | rRNA 2-O-methyltransferase fibrillar                                                                        |
| Cluster -1193 | SF3B1                | Splicing factor 3B subunit 1                                                                                |
| Cluster -1193 | RPL17;RPL17-C18orf32 | 60S ribosomal protein L17                                                                                   |
| Cluster -1193 | RPL10                | N/A                                                                                                         |
| Cluster -1193 | GLUD1;GLUD2          | Glutamate dehydrogenase 1, mitochondrial;Glutamate dehydrogenase 2, mitochondrial                           |
| Cluster -1193 | N/A                  | N/A                                                                                                         |
| Cluster -1193 | PLOD3                | Procollagen-lysine,2-oxoglutarate 5-dioxygenase 3                                                           |
| Cluster -1193 | SAMHD1               | Deoxynucleoside triphosphate triphosphohydrolase SAMHD1                                                     |
| Cluster -1193 | PRDX3                | Thioredoxin-dependent peroxide reductase, mitochondrial                                                     |
| Cluster -1193 | ATP1B3               | Sodium/potassium-transporting ATPase subunit beta-3                                                         |
| Cluster -1193 | GALK1                | Galactokinase                                                                                               |
| Cluster -1193 | DDOST                | Dolichyl-diphosphooligosaccharide--protein glycosyltransferase 48 kDa subunit                               |
| Cluster -1193 | MCM4                 | DNA replication licensing factor MCM4                                                                       |
| Cluster -1193 | ERGIC2               | Endoplasmic reticulum-Golgi intermediate compartment protein 2                                              |
| Cluster -1193 | LEPRE1               | Prolyl 3-hydroxylase 1                                                                                      |
| Cluster -1193 | ATAD3A               | ATPase family AAA domain-containing protein 3A                                                              |
| Cluster -1193 | TM9SF4               | Transmembrane 9 superfamily member 4                                                                        |
| Cluster -1193 | PCCB                 | Propionyl-CoA carboxylase beta chain, mitochondrial                                                         |
| Cluster -1193 | SDF2                 | Stromal cell-derived factor 2                                                                               |
| Cluster -1193 | SCP2                 | Non-specific lipid-transfer protein                                                                         |
| Cluster -1193 | CEBPB                | CCAAT/enhancer-binding protein beta                                                                         |
| Cluster -1193 | MYO1B                | Unconventional myosin-Ib                                                                                    |
| Cluster -1193 | PDCD6                | Programmed cell death protein 6                                                                             |
| Cluster -1193 | GALNT5               | Polypeptide N-acetylgalactosaminyltransferase 5                                                             |
| Cluster -1193 | COL12A1              | N/A                                                                                                         |
| Cluster -1193 | GOLIM4               | Golgi integral membrane protein 4                                                                           |



|               |             |                                                                                             |
|---------------|-------------|---------------------------------------------------------------------------------------------|
| Cluster -1193 | RPS6KA3     | Ribosomal protein S6 kinase alpha-3                                                         |
| Cluster -1193 | SLC25A11    | Mitochondrial 2-oxoglutarate/malate carrier protein                                         |
| Cluster -1193 | C9orf89     | Bcl10-interacting CARD protein                                                              |
| Cluster -1193 | SLIRP       | SRA stem-loop-interacting RNA-binding protein, mitochondrial                                |
| Cluster -1193 | SUCLG1      | Succinyl-CoA ligase [ADP/GDP-forming] subunit alpha, mitochondrial                          |
| Cluster -1193 | PPA2        | Inorganic pyrophosphatase 2, mitochondrial                                                  |
| Cluster -1193 | NUCB2;Nucb2 | Nucleobindin-2;Nesfatin-1                                                                   |
| Cluster -1193 | HSPA5       | 78 kDa glucose-regulated protein                                                            |
| Cluster -1193 | EIF2AK2     | Interferon-induced, double-stranded RNA-activated protein kinase                            |
| Cluster -1193 | ERLEC1      | Endoplasmic reticulum lectin 1                                                              |
| Cluster -1193 | MICAL1      | Protein-methionine sulfoxide oxidase MICAL1                                                 |
| Cluster -1193 | ELMOD2      | ELMO domain-containing protein 2                                                            |
| Cluster -1193 | PDCD11      | Protein RRP5 homolog                                                                        |
| Cluster -1193 | SUMF2       | Sulfatase-modifying factor 2                                                                |
| Cluster -1193 | CHP1        | Calcineurin B homologous protein 1                                                          |
| Cluster -1193 | CPSF7       | Cleavage and polyadenylation specificity factor subunit 7                                   |
| Cluster -1193 | CCAR2       | Cell cycle and apoptosis regulator protein 2                                                |
| Cluster -1193 | RRAD        | GTP-binding protein RAD                                                                     |
| Cluster -1193 | NOP56       | Nucleolar protein 56                                                                        |
| Cluster -1193 | ECHS1       | Enoyl-CoA hydratase, mitochondrial                                                          |
| Cluster -1193 | SEC23IP     | SEC23-interacting protein                                                                   |
| Cluster -1193 | TM9SF3      | Transmembrane 9 superfamily member 3                                                        |
| Cluster -1193 | NUP107      | Nuclear pore complex protein Nup107                                                         |
| Cluster -1193 | H6PD        | GDH/6PGL endoplasmic bifunctional protein;Glucose 1-dehydrogenase;6-phosphogluconolactonase |
| Cluster -1193 | DKC1        | H/ACA ribonucleoprotein complex subunit 4                                                   |
| Cluster -1193 | BUB3        | Mitotic checkpoint protein BUB3                                                             |
| Cluster -1193 | TOP2B       | DNA topoisomerase 2-beta;DNA topoisomerase 2                                                |
| Cluster -1193 | CLN6        | Ceroid-lipofuscinosis neuronal protein 6                                                    |
| Cluster -1193 | TBCE        | Tubulin-specific chaperone E                                                                |
| Cluster -1193 | SRPRB       | Signal recognition particle receptor subunit beta                                           |
| Cluster -1193 | CCPG1       | Cell cycle progression protein 1                                                            |
| Cluster -1193 | ACOX1       | Peroxisomal acyl-coenzyme A oxidase 1                                                       |
| Cluster -1193 | TPBG        | Trophoblast glycoprotein                                                                    |
| Cluster -1193 | NUCB1       | Nucleobindin-1                                                                              |
| Cluster -1193 | ATP5C1      | ATP synthase subunit gamma, mitochondrial                                                   |
| Cluster -1193 | CALB2       | Calretinin                                                                                  |
| Cluster -1193 | P4HB        | Protein disulfide-isomerase                                                                 |
| Cluster -1193 | FKBP9       | Peptidyl-prolyl cis-trans isomerase FKBP9                                                   |

|               |          |                                                                                 |
|---------------|----------|---------------------------------------------------------------------------------|
| Cluster -1193 | PREB     | Prolactin regulatory element-binding protein                                    |
| Cluster -1193 | CYP20A1  | Cytochrome P450 20A1                                                            |
| Cluster -1193 | SLC12A4  | Solute carrier family 12 member 4                                               |
| Cluster -1193 | HEG1     | Protein HEG homolog 1                                                           |
| Cluster -1193 | FTSJ3    | pre-rRNA processing protein FTSJ3                                               |
| Cluster -1193 | LAMB2    | Laminin subunit beta-2                                                          |
| Cluster -1193 | SRPR     | Signal recognition particle receptor subunit alpha                              |
| Cluster -1193 | RSL1D1   | Ribosomal L1 domain-containing protein 1                                        |
| Cluster -1193 | LETM1    | LETM1 and EF-hand domain-containing protein 1, mitochondrial                    |
| Cluster -1193 | DNAJB11  | DnaJ homolog subfamily B member 11                                              |
| Cluster -1193 | ATP13A1  | Manganese-transporting ATPase 13A1                                              |
| Cluster -1193 | MIA3     | Melanoma inhibitory activity protein 3                                          |
| Cluster -1193 | HYOU1    | Hypoxia up-regulated protein 1                                                  |
| Cluster -1193 | STAT2    | Signal transducer and activator of transcription 2                              |
| Cluster -1193 | GLB1     | Beta-galactosidase                                                              |
| Cluster -1193 | ACSL3    | Long-chain-fatty-acid--CoA ligase 3                                             |
| Cluster -1193 | NSF      | Vesicle-fusing ATPase                                                           |
| Cluster -1193 | SCARB2   | Lysosome membrane protein 2                                                     |
| Cluster -1193 | GFM2     | Ribosome-releasing factor 2, mitochondrial                                      |
| Cluster -1193 | HSD17B12 | Very-long-chain 3-oxoacyl-CoA reductase                                         |
| Cluster -1193 | NNT      | NAD(P) transhydrogenase, mitochondrial                                          |
| Cluster -1193 | ATP5F1   | ATP synthase F(0) complex subunit B1, mitochondrial                             |
| Cluster -1193 | SELM     | Selenoprotein M                                                                 |
| Cluster -1193 | ARL1     | ADP-ribosylation factor-like protein 1                                          |
| Cluster -1193 | SEL1L    | Protein sel-1 homolog 1                                                         |
| Cluster -1193 | EXOC4    | Exocyst complex component 4                                                     |
| Cluster -1193 | EMC1     | ER membrane protein complex subunit 1                                           |
| Cluster -1193 | TCIRG1   | V-type proton ATPase 116 kDa subunit a isoform 3;V-type proton ATPase subunit a |
| Cluster -1193 | PON2     | Serum paraoxonase/arylesterase 2                                                |
| Cluster -1193 | MYO1D    | Unconventional myosin-Id                                                        |
| Cluster -1193 | RNF170   | E3 ubiquitin-protein ligase RNF170                                              |
| Cluster -1193 | MRPL50   | 39S ribosomal protein L50, mitochondrial                                        |
| Cluster -1193 | ETFDH    | Electron transfer flavoprotein-ubiquinone oxidoreductase, mitochondrial         |
| Cluster -1193 | LACTB    | Serine beta-lactamase-like protein LACTB, mitochondrial                         |
| Cluster -1193 | ACADVL   | Very long-chain specific acyl-CoA dehydrogenase, mitochondrial                  |
| Cluster -1193 | EPHX1    | Epoxide hydrolase 1                                                             |
| Cluster -1193 | AGPS     | Alkyldihydroxyacetonephosphate synthase, peroxisomal                            |
| Cluster -1193 | XPO7     | Exportin-7                                                                      |

|               |          |                                                                                                    |
|---------------|----------|----------------------------------------------------------------------------------------------------|
| Cluster -1193 | DHRS4    | Dehydrogenase/reductase SDR family member 4                                                        |
| Cluster -1193 | CISD1    | CDGSH iron-sulfur domain-containing protein 1                                                      |
| Cluster -1193 | NUP188   | Nucleoporin NUP188 homolog                                                                         |
| Cluster -1193 | SLC25A6  | ADP/ATP translocase 3;ADP/ATP translocase 3, N-terminally processed                                |
| Cluster -1193 | APOL2    | Apolipoprotein L2                                                                                  |
| Cluster -1193 | SLC39A14 | Zinc transporter ZIP14                                                                             |
| Cluster -1193 | MECR     | Trans-2-enoyl-CoA reductase, mitochondrial                                                         |
| Cluster -1193 | FDXR     | NADPH:adrenodoxin oxidoreductase, mitochondrial                                                    |
| Cluster -1193 | SFXN3    | Sideroflexin-3                                                                                     |
| Cluster -1193 | B2M      | Beta-2-microglobulin;Beta-2-microglobulin form pI 5.3                                              |
| Cluster -1193 | SEC63    | Translocation protein SEC63 homolog                                                                |
| Cluster -1193 | UQCR10   | Cytochrome b-c1 complex subunit 9                                                                  |
| Cluster -1193 | TMEM165  | Transmembrane protein 165                                                                          |
| Cluster -1193 | OXCT1    | Succinyl-CoA:3-ketoacid coenzyme A transferase 1, mitochondrial                                    |
| Cluster -1193 | ATP5B    | ATP synthase subunit beta, mitochondrial;ATP synthase subunit beta                                 |
| Cluster -1193 | MT-ND5   | NADH-ubiquinone oxidoreductase chain 5                                                             |
| Cluster -1193 | C21orf33 | N/A                                                                                                |
| Cluster -1193 | SFXN1    | Sideroflexin-1                                                                                     |
| Cluster -1193 | APMAP    | Adipocyte plasma membrane-associated protein                                                       |
| Cluster -1193 | SPNS1    | Protein spinster homolog 1                                                                         |
| Cluster -1193 | TRAM1    | Translocating chain-associated membrane protein 1                                                  |
| Cluster -1193 | DLD      | Dihydrolipoyl dehydrogenase, mitochondrial;Dihydrolipoyl dehydrogenase                             |
| Cluster -1193 | ATP6V0D1 | V-type proton ATPase subunit d 1                                                                   |
| Cluster -1193 | NDUFAF4  | NADH dehydrogenase [ubiquinone] 1 alpha subcomplex assembly factor 4                               |
| Cluster -1193 | SLC25A24 | Calcium-binding mitochondrial carrier protein SCaMC-1                                              |
| Cluster -1193 | NFU1     | NFU1 iron-sulfur cluster scaffold homolog, mitochondrial                                           |
| Cluster -1193 | ATP2A2   | Sarcoplasmic/endoplasmic reticulum calcium ATPase 2                                                |
| Cluster -1193 | HSD17B10 | 3-hydroxyacyl-CoA dehydrogenase type-2                                                             |
| Cluster -1193 | TMX3     | Protein disulfide-isomerase TMX3                                                                   |
| Cluster -1193 | STT3B    | Dolichyl-diphosphooligosaccharide--protein glycosyltransferase subunit STT3B                       |
| Cluster -1193 | MGAT1    | Alpha-1,3-mannosyl-glycoprotein 2-beta-N-acetylglucosaminyltransferase                             |
| Cluster -1193 | ATP5A1   | ATP synthase subunit alpha, mitochondrial                                                          |
| Cluster -1193 | GNPAT    | Dihydroxyacetone phosphate acyltransferase                                                         |
| Cluster -1193 | SEC11A   | Signal peptidase complex catalytic subunit SEC11A;Signal peptidase complex catalytic subunit SEC11 |
| Cluster -1193 | GPSM1    | G-protein-signaling modulator 1                                                                    |

|               |                      |                                                                                                                                              |
|---------------|----------------------|----------------------------------------------------------------------------------------------------------------------------------------------|
| Cluster -1193 | HADHA                | Trifunctional enzyme subunit alpha, mitochondrial;Long-chain enoyl-CoA hydratase;Long chain 3-hydroxyacyl-CoA dehydrogenase                  |
| Cluster -1193 | NXN                  | Nucleoredoxin                                                                                                                                |
| Cluster -1193 | ANXA11               | Annexin A11                                                                                                                                  |
| Cluster -1193 | CD276                | CD276 antigen                                                                                                                                |
| Cluster -1193 | M6PR                 | Cation-dependent mannose-6-phosphate receptor                                                                                                |
| Cluster -1193 | DECR1                | 2,4-dienoyl-CoA reductase, mitochondrial                                                                                                     |
| Cluster -1193 | MRPS9                | 28S ribosomal protein S9, mitochondrial                                                                                                      |
| Cluster -1193 | PHB                  | Prohibitin                                                                                                                                   |
| Cluster -1193 | UQCRC1               | Cytochrome b-c1 complex subunit 1, mitochondrial                                                                                             |
| Cluster -1193 | UQCRC2               | Cytochrome b-c1 complex subunit 2, mitochondrial                                                                                             |
| Cluster -1193 | LONP1                | Lon protease homolog, mitochondrial                                                                                                          |
| Cluster -1193 | SDHA                 | Succinate dehydrogenase [ubiquinone] flavoprotein subunit, mitochondrial                                                                     |
| Cluster -1193 | ECI1;DCI             | Enoyl-CoA delta isomerase 1, mitochondrial                                                                                                   |
| Cluster -1193 | DICER1               | Endoribonuclease Dicer                                                                                                                       |
| Cluster -1193 | ERP44                | Endoplasmic reticulum resident protein 44                                                                                                    |
| Cluster -1193 | ADPGK                | ADP-dependent glucokinase                                                                                                                    |
| Cluster -1193 | TMED4                | Transmembrane emp24 domain-containing protein 4                                                                                              |
| Cluster -1193 | MOGS                 | Mannosyl-oligosaccharide glucosidase                                                                                                         |
| Cluster -1193 | RPN2                 | Dolichyl-diphosphooligosaccharide--protein glycosyltransferase subunit 2                                                                     |
| Cluster -1193 | RPN1                 | Dolichyl-diphosphooligosaccharide--protein glycosyltransferase subunit 1                                                                     |
| Cluster -1193 | MMP2                 | 72 kDa type IV collagenase;PEX                                                                                                               |
| Cluster -1193 | TAPBP                | Tapasin                                                                                                                                      |
| Cluster -1193 | DDX11;DDX11L8;DDX12P | Probable ATP-dependent RNA helicase DDX11;Putative ATP-dependent RNA helicase DDX11-like protein 8;Putative ATP-dependent RNA helicase DDX12 |
| Cluster -1193 | GSTK1                | Glutathione S-transferase kappa 1                                                                                                            |
| Cluster -1193 | TMED9                | Transmembrane emp24 domain-containing protein 9                                                                                              |
| Cluster -1193 | CYB5B                | Cytochrome b5 type B                                                                                                                         |
| Cluster -1193 | LMAN2                | Vesicular integral-membrane protein VIP36                                                                                                    |
| Cluster -1193 | IKBIP                | Inhibitor of nuclear factor kappa-B kinase-interacting protein                                                                               |
| Cluster -1193 | PRPF8                | Pre-mRNA-processing-splicing factor 8                                                                                                        |
| Cluster -1193 | OS9                  | Protein OS-9                                                                                                                                 |
| Cluster -1193 | CPOX                 | Oxygen-dependent coproporphyrinogen-III oxidase, mitochondrial                                                                               |
| Cluster -1193 | COX4I1               | Cytochrome c oxidase subunit 4 isoform 1, mitochondrial                                                                                      |
| Cluster -1193 | CS                   | Citrate synthase, mitochondrial;Citrate synthase                                                                                             |
| Cluster -1193 | TARDBP               | TAR DNA-binding protein 43                                                                                                                   |
| Cluster -1193 | TMED7;TMED7-         | Transmembrane emp24 domain-containing protein 7                                                                                              |

|               |             |                                                                                                      |
|---------------|-------------|------------------------------------------------------------------------------------------------------|
|               | TICAM2      |                                                                                                      |
| Cluster -1193 | SUN2        | SUN domain-containing protein 2                                                                      |
| Cluster -1193 | PIGS        | GPI transamidase component PIG-S                                                                     |
| Cluster -1193 | PITRM1      | Presequence protease, mitochondrial                                                                  |
| Cluster -1193 | CANX        | Calnexin                                                                                             |
| Cluster -1193 | SPTLC1      | Serine palmitoyltransferase 1                                                                        |
| Cluster -1193 | NOMO2;NOMO3 | Nodal modulator 2;Nodal modulator 3                                                                  |
| Cluster -1193 | OGDH        | 2-oxoglutarate dehydrogenase, mitochondrial                                                          |
| Cluster -1193 | CISD2       | CDGSH iron-sulfur domain-containing protein 2                                                        |
| Cluster -1193 | MTX2        | Metaxin-2                                                                                            |
| Cluster -1193 | EIF4G2      | Eukaryotic translation initiation factor 4 gamma 2                                                   |
| Cluster -1193 | UGGT1       | UDP-glucose:glycoprotein glucosyltransferase 1                                                       |
| Cluster -1193 | EXOC2       | Exocyst complex component 2                                                                          |
| Cluster -1193 | NCLN        | Nicalin                                                                                              |
| Cluster -1193 | GANAB       | Neutral alpha-glucosidase AB                                                                         |
| Cluster -1193 | CALU        | Calumenin                                                                                            |
| Cluster -1193 | TOR1B       | Torsin-1B                                                                                            |
| Cluster -1193 | PIGT        | GPI transamidase component PIG-T                                                                     |
| Cluster -1193 | MSRB3       | Methionine-R-sulfoxide reductase B3                                                                  |
| Cluster -1193 | NDUFA13     | NADH dehydrogenase [ubiquinone] 1 alpha subcomplex subunit 13                                        |
| Cluster -1193 | IARS2       | Isoleucine--tRNA ligase, mitochondrial                                                               |
| Cluster -1193 | TMEM43      | Transmembrane protein 43                                                                             |
| Cluster -1193 | IMMT        | MICOS complex subunit MIC60                                                                          |
| Cluster -1193 | NDUFA9      | NADH dehydrogenase [ubiquinone] 1 alpha subcomplex subunit 9, mitochondrial                          |
| Cluster -1193 | TMED1       | Transmembrane emp24 domain-containing protein 1                                                      |
| Cluster -1193 | ALDH18A1    | Delta-1-pyrroline-5-carboxylate synthase;Glutamate 5-kinase;Gamma-glutamyl phosphate reductase       |
| Cluster -1193 | GLS         | Glutaminase kidney isoform, mitochondrial                                                            |
| Cluster -1193 | NUP85       | Nuclear pore complex protein Nup85                                                                   |
| Cluster -1193 | ABCD3       | ATP-binding cassette sub-family D member 3                                                           |
| Cluster -1193 | PHB2        | Prohibitin-2                                                                                         |
| Cluster -1193 | ALG2        | Alpha-1,3/1,6-mannosyltransferase ALG2                                                               |
| Cluster -1193 | MMGT1       | Membrane magnesium transporter 1                                                                     |
| Cluster -1193 | AGTRAP      | Type-1 angiotensin II receptor-associated protein                                                    |
| Cluster -1193 | COPB1       | Coatomer subunit beta                                                                                |
| Cluster -1193 | CYC1        | Cytochrome c1, heme protein, mitochondrial                                                           |
| Cluster -1193 | P4HA1       | Prolyl 4-hydroxylase subunit alpha-1                                                                 |
| Cluster -1193 | CPQ         | Carboxypeptidase Q                                                                                   |
| Cluster -1193 | CYB5R3      | NADH-cytochrome b5 reductase 3;NADH-cytochrome b5 reductase 3 membrane-bound form;NADH-cytochrome b5 |

|               |           |                                                                                                 |
|---------------|-----------|-------------------------------------------------------------------------------------------------|
|               |           | reductase 3 soluble form                                                                        |
| Cluster -1193 | CYB5R1    | NADH-cytochrome b5 reductase 1                                                                  |
| Cluster -1193 | RAB9A     | Ras-related protein Rab-9A                                                                      |
| Cluster -1193 | PXDN      | Peroxidasin homolog                                                                             |
| Cluster -1193 | GOLGA5    | Golgin subfamily A member 5                                                                     |
| Cluster -1193 | OXR1      | Oxidation resistance protein 1                                                                  |
| Cluster -1193 | SOAT1     | Sterol O-acyltransferase 1                                                                      |
| Cluster -1193 | RAB2A     | Ras-related protein Rab-2A                                                                      |
| Cluster -1193 | PSMC5     | 26S protease regulatory subunit 8                                                               |
| Cluster -1193 | MARS      | Methionine--tRNA ligase, cytoplasmic                                                            |
| Cluster -1193 | AP2A2     | AP-2 complex subunit alpha-2                                                                    |
| Cluster -1193 | SNX6      | Sorting nexin-6;Sorting nexin-6, N-terminally processed                                         |
| Cluster -1193 | AP2S1     | AP-2 complex subunit sigma                                                                      |
| Cluster -1193 | AP3M1     | AP-3 complex subunit mu-1                                                                       |
| Cluster -1193 | RBPJ      | Recombining binding protein suppressor of hairless                                              |
| Cluster -1193 | CASC4     | Protein CASC4                                                                                   |
| Cluster -1193 | ITGA11    | Integrin alpha-11                                                                               |
| Cluster -1193 | SNX18     | Sorting nexin-18                                                                                |
| Cluster -1193 | LPCAT2    | Lysophosphatidylcholine acyltransferase 2                                                       |
| Cluster -1193 | ANGPT1    | Angiopoietin-1                                                                                  |
| Cluster -1193 | RAB10     | Ras-related protein Rab-10                                                                      |
| Cluster -1193 | BZW2      | Basic leucine zipper and W2 domain-containing protein 2                                         |
| Cluster -1193 | TGFB1I1   | Transforming growth factor beta-1-induced transcript 1 protein                                  |
| Cluster -1193 | NIPSNAP3A | Protein NipSnap homolog 3A                                                                      |
| Cluster -1193 | SLC39A7   | Zinc transporter SLC39A7                                                                        |
| Cluster -1193 | KDELC1    | KDEL motif-containing protein 1                                                                 |
| Cluster -1193 | ITGB5     | Integrin beta-5;Integrin beta                                                                   |
| Cluster -1193 | N/A       | N/A                                                                                             |
| Cluster -1193 | PTPN1     | Tyrosine-protein phosphatase non-receptor type 1;Tyrosine-protein phosphatase non-receptor type |
| Cluster -1193 | NCKAP1    | Nck-associated protein 1                                                                        |
| Cluster -1193 | VPS35     | Vacuolar protein sorting-associated protein 35                                                  |
| Cluster -1193 | ATL3      | Atlastin-3                                                                                      |
| Cluster -1193 | PFKM      | ATP-dependent 6-phosphofructokinase, muscle type                                                |
| Cluster -1193 | ITGB1     | Integrin beta-1                                                                                 |
| Cluster -1193 | FAM162A   | Protein FAM162A                                                                                 |
| Cluster -1193 | GNAI2     | Guanine nucleotide-binding protein G(i) subunit alpha-2                                         |
| Cluster -1193 | MYOF      | Myoferlin                                                                                       |
| Cluster -1193 | HIBCH     | 3-hydroxyisobutyryl-CoA hydrolase, mitochondrial                                                |
| Cluster -1193 | SPCS3     | Signal peptidase complex subunit 3                                                              |

|               |                                 |                                                                                                                                                                  |
|---------------|---------------------------------|------------------------------------------------------------------------------------------------------------------------------------------------------------------|
| Cluster -1193 | MANF                            | Mesencephalic astrocyte-derived neurotrophic factor                                                                                                              |
| Cluster -1193 | HSP90B1                         | Endoplasmic                                                                                                                                                      |
| Cluster -1193 | GLS                             | Glutaminase kidney isoform, mitochondrial                                                                                                                        |
| Cluster -1193 | ACOX3                           | Peroxisomal acyl-coenzyme A oxidase 3                                                                                                                            |
| Cluster -1193 | ATP5J2;ATP5J2-PTCD1             | ATP synthase subunit f, mitochondrial                                                                                                                            |
| Cluster -1193 | PTRH2                           | Peptidyl-tRNA hydrolase 2, mitochondrial                                                                                                                         |
| Cluster -1193 | ATP6V1D                         | V-type proton ATPase subunit D                                                                                                                                   |
| Cluster -1193 | RRAGC                           | Ras-related GTP-binding protein C                                                                                                                                |
| Cluster -1193 | DNAJC13                         | DnaJ homolog subfamily C member 13                                                                                                                               |
| Cluster -1193 | SACM1L                          | Phosphatidylinositide phosphatase SAC1                                                                                                                           |
| Cluster -1193 | FLOT2                           | Flotillin-2                                                                                                                                                      |
| Cluster -1193 | MTDH                            | Protein LYRIC                                                                                                                                                    |
| Cluster -1193 | FLOT1                           | Flotillin-1                                                                                                                                                      |
| Cluster -1193 | MPDU1                           | Mannose-P-dolichol utilization defect 1 protein                                                                                                                  |
| Cluster -1193 | CLPTM1L                         | N/A                                                                                                                                                              |
| Cluster -1193 | CNPY4                           | Protein canopy homolog 4                                                                                                                                         |
| Cluster -1193 | HM13                            | Minor histocompatibility antigen H13                                                                                                                             |
| Cluster -1193 | ESYT1                           | Extended synaptotagmin-1                                                                                                                                         |
| Cluster -1193 | ERO1L                           | ERO1-like protein alpha                                                                                                                                          |
| Cluster -1193 | PRCP                            | Lysosomal Pro-X carboxypeptidase                                                                                                                                 |
| Cluster -1193 | CD97                            | CD97 antigen;CD97 antigen subunit alpha;CD97 antigen subunit beta                                                                                                |
| Cluster -1193 | MTCH2                           | Mitochondrial carrier homolog 2                                                                                                                                  |
| Cluster -1193 | ANO10                           | Anoctamin-10                                                                                                                                                     |
| Cluster -1193 | MBOAT2                          | Lysophospholipid acyltransferase 2                                                                                                                               |
| Cluster -1193 | IDH2                            | Isocitrate dehydrogenase [NADP], mitochondrial                                                                                                                   |
| Cluster -1193 | NCEH1                           | Neutral cholesterol ester hydrolase 1                                                                                                                            |
| Cluster -1193 | ALDH3A2;ALDH3A1;ALDH3B2;ALDH3B1 | Fatty aldehyde dehydrogenase;Aldehyde dehydrogenase, dimeric NADP-preferring;Aldehyde dehydrogenase family 3 member B1;Aldehyde dehydrogenase family 3 member B2 |
| Cluster -1193 | PCYOX1                          | Prenylcysteine oxidase 1                                                                                                                                         |
| Cluster -1193 | PRKRA                           | Interferon-inducible double-stranded RNA-dependent protein kinase activator A                                                                                    |
| Cluster -1193 | DRG2                            | Developmentally-regulated GTP-binding protein 2                                                                                                                  |
| Cluster -1193 | TNPO2                           | Transportin-2                                                                                                                                                    |
| Cluster -1193 | ERGIC1                          | Endoplasmic reticulum-Golgi intermediate compartment protein 1                                                                                                   |
| Cluster -1193 | RRAS2                           | Ras-related protein R-Ras2                                                                                                                                       |
| Cluster -1193 | BCAP29                          | B-cell receptor-associated protein 29                                                                                                                            |
| Cluster -1193 | DOCK5                           | Dedicator of cytokinesis protein 5                                                                                                                               |
| Cluster -1193 | SESN2                           | Sestrin-2                                                                                                                                                        |
| Cluster -1193 | CCDC50                          | Coiled-coil domain-containing protein 50                                                                                                                         |

|               |           |                                                                                                                                                                                                                                                                     |
|---------------|-----------|---------------------------------------------------------------------------------------------------------------------------------------------------------------------------------------------------------------------------------------------------------------------|
| Cluster -1193 | LZIC      | Protein LZIC                                                                                                                                                                                                                                                        |
| Cluster -1193 | APC2      | Adenomatous polyposis coli protein 2                                                                                                                                                                                                                                |
| Cluster -1193 | XXYLT1    | Xyloside xylosyltransferase 1                                                                                                                                                                                                                                       |
| Cluster -1193 | PPID      | Peptidyl-prolyl cis-trans isomerase D                                                                                                                                                                                                                               |
| Cluster -1193 | INTS4     | Integrator complex subunit 4                                                                                                                                                                                                                                        |
| Cluster -1193 | TOR1A     | Torsin-1A                                                                                                                                                                                                                                                           |
| Cluster -1193 | DNASE2    | Deoxyribonuclease-2-alpha                                                                                                                                                                                                                                           |
| Cluster -1193 | FAM149A   | Protein FAM149A                                                                                                                                                                                                                                                     |
| Cluster -1193 | GALC      | Galactocerebrosidase                                                                                                                                                                                                                                                |
| Cluster -1193 | ITM2B     | Integral membrane protein 2B;BRI2, membrane form;BRI2 intracellular domain;BRI2C, soluble form;Bri23 peptide                                                                                                                                                        |
| Cluster -1193 | ARMCX3    | Armadillo repeat-containing X-linked protein 3                                                                                                                                                                                                                      |
| Cluster -1193 | IMMT      | MICOS complex subunit MIC60                                                                                                                                                                                                                                         |
| Cluster -1193 | TRIP13    | Pachytene checkpoint protein 2 homolog                                                                                                                                                                                                                              |
| Cluster -1193 | IFIT5     | Interferon-induced protein with tetratricopeptide repeats 5                                                                                                                                                                                                         |
| Cluster -1193 | CASP7     | Caspase-7;Caspase-7 subunit p20;Caspase-7 subunit p11                                                                                                                                                                                                               |
| Cluster -1193 | TNFRSF11B | Tumor necrosis factor receptor superfamily member 11B                                                                                                                                                                                                               |
| Cluster -1193 | SDCBP     | Syntenin-1                                                                                                                                                                                                                                                          |
| Cluster -1193 | DDX3X     | ATP-dependent RNA helicase DDX3X                                                                                                                                                                                                                                    |
| Cluster -1193 | ECE1      | Endothelin-converting enzyme 1                                                                                                                                                                                                                                      |
| Cluster -1193 | APP       | Amyloid beta A4 protein;N-APP;Soluble APP-alpha;Soluble APP-beta;C99;Beta-amyloid protein 42;Beta-amyloid protein 40;C83;P3(42);P3(40);C80;Gamma-secretase C-terminal fragment 59;Gamma-secretase C-terminal fragment 57;Gamma-secretase C-terminal fragment 50;C31 |
| Cluster -1193 | SPG21     | Maspardin                                                                                                                                                                                                                                                           |
| Cluster -1193 | APIP      | Methylthioribulose-1-phosphate dehydratase                                                                                                                                                                                                                          |
| Cluster -1193 | FAF2      | FAS-associated factor 2                                                                                                                                                                                                                                             |
| Cluster -1193 | PRPF38A   | Pre-mRNA-splicing factor 38A                                                                                                                                                                                                                                        |
| Cluster -1193 | GNA13     | Guanine nucleotide-binding protein subunit alpha-13                                                                                                                                                                                                                 |
| Cluster -1193 | NUP93     | Nuclear pore complex protein Nup93                                                                                                                                                                                                                                  |
| Cluster -1193 | SLC38A2   | Sodium-coupled neutral amino acid transporter 2                                                                                                                                                                                                                     |
| Cluster -1193 | SUN1      | SUN domain-containing protein 1                                                                                                                                                                                                                                     |
| Cluster -1193 | PRPF31    | U4/U6 small nuclear ribonucleoprotein Prp31                                                                                                                                                                                                                         |
| Cluster -1193 | SCFD2     | Sec1 family domain-containing protein 2                                                                                                                                                                                                                             |
| Cluster -1193 | PIP5K2    | Inositol hexakisphosphate and diphosphoinositol-pentakisphosphate kinase 2                                                                                                                                                                                          |
| Cluster -1193 | CDC16     | Cell division cycle protein 16 homolog                                                                                                                                                                                                                              |
| Cluster -1193 | CAV1      | Caveolin-1;Caveolin                                                                                                                                                                                                                                                 |
| Cluster -1193 | RBM12     | RNA-binding protein 12                                                                                                                                                                                                                                              |
| Cluster -1193 | RNF25     | E3 ubiquitin-protein ligase RNF25                                                                                                                                                                                                                                   |
| Cluster -1193 | KLC4      | Kinesin light chain 4                                                                                                                                                                                                                                               |



|               |          |                                                                                                                                           |
|---------------|----------|-------------------------------------------------------------------------------------------------------------------------------------------|
| Cluster -1193 | ATP6V1H  | V-type proton ATPase subunit H                                                                                                            |
| Cluster -1193 | PBXIP1   | Pre-B-cell leukemia transcription factor-interacting protein 1                                                                            |
| Cluster -1193 | PPP6C    | Serine/threonine-protein phosphatase 6 catalytic subunit;Serine/threonine-protein phosphatase 6 catalytic subunit, N-terminally processed |
| Cluster -1193 | IKBIP    | Inhibitor of nuclear factor kappa-B kinase-interacting protein                                                                            |
| Cluster -1193 | FHOD1    | FH1/FH2 domain-containing protein 1                                                                                                       |
| Cluster -1193 | ZNFX1    | NFX1-type zinc finger-containing protein 1                                                                                                |
| Cluster -1193 | CMBL     | Carboxymethylenebutenolidase homolog                                                                                                      |
| Cluster -1193 | SERPINE1 | Plasminogen activator inhibitor 1                                                                                                         |
| Cluster -1193 | PLEKHO2  | Pleckstrin homology domain-containing family O member 2                                                                                   |
| Cluster -1193 | TFRC     | Transferrin receptor protein 1;Transferrin receptor protein 1, serum form                                                                 |
| Cluster -1193 | NOL6     | Nucleolar protein 6                                                                                                                       |
| Cluster -1193 | NAA35    | N-alpha-acetyltransferase 35, NatC auxiliary subunit                                                                                      |
| Cluster -1193 | OPA1     | Dynamin-like 120 kDa protein, mitochondrial;Dynamin-like 120 kDa protein, form S1                                                         |
| Cluster -1193 | ATP5D    | ATP synthase subunit delta, mitochondrial                                                                                                 |
